# Supplementary material for: Testing the Domino Theory of Gene Loss in Buchnera aphidicola: The Relevance of Epistatic Interactions
Source: MDPI journal article supplement (doi:10.3390/life8020017), 2018-05-29
Supplement: s1 [file s1]

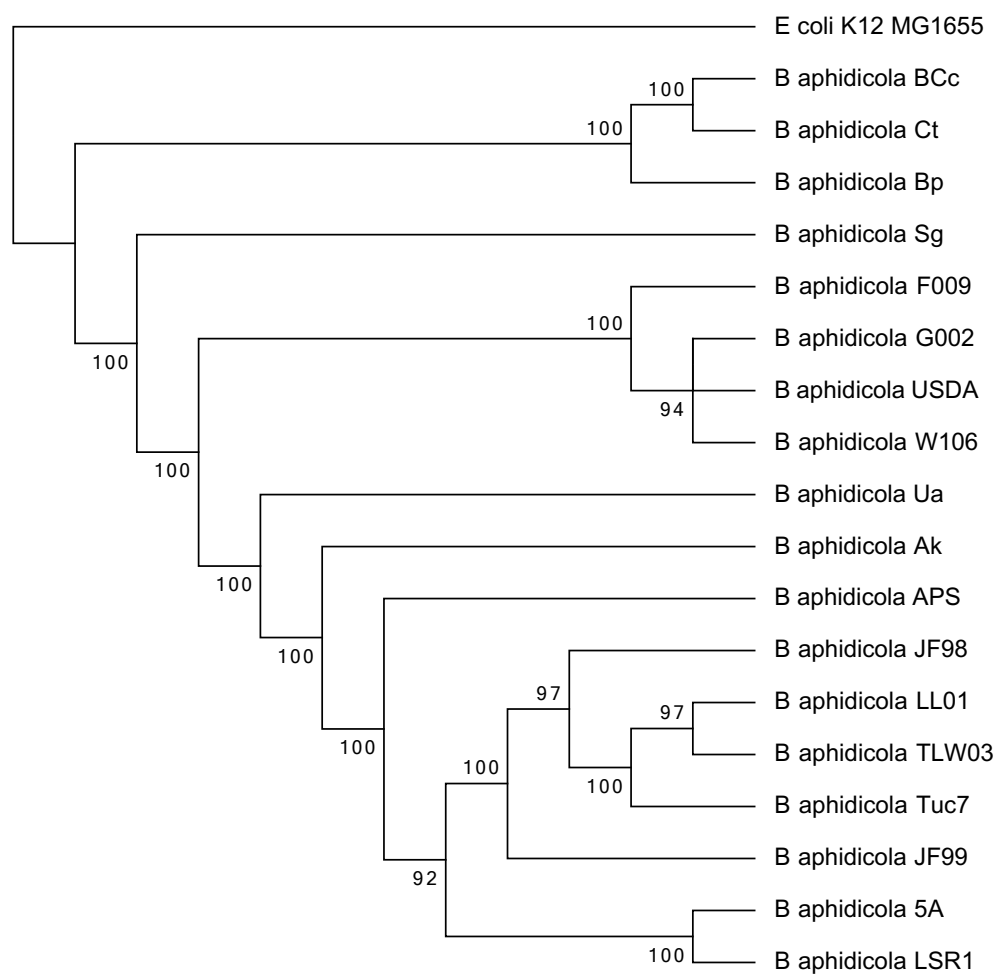

Phylogenetic tree of the *Buchnera*. The tree was reconstructed with MrBayes (see methods). Node numbers indicate posterior probabilities.

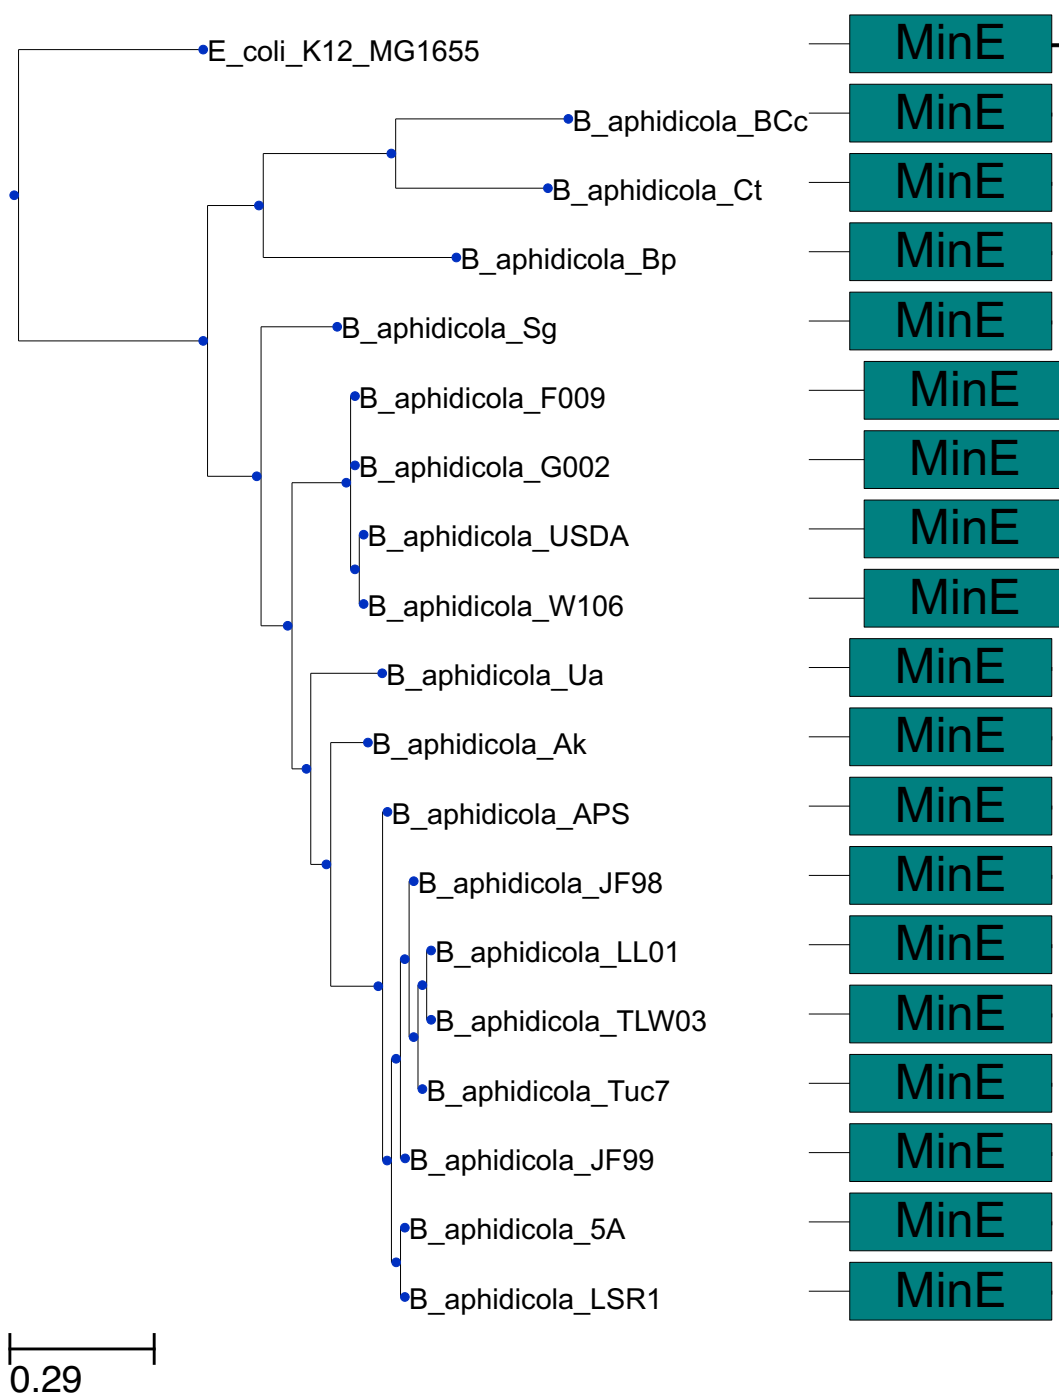

*minE*  
NP\_415692.1  
cell division topological specificity factor.

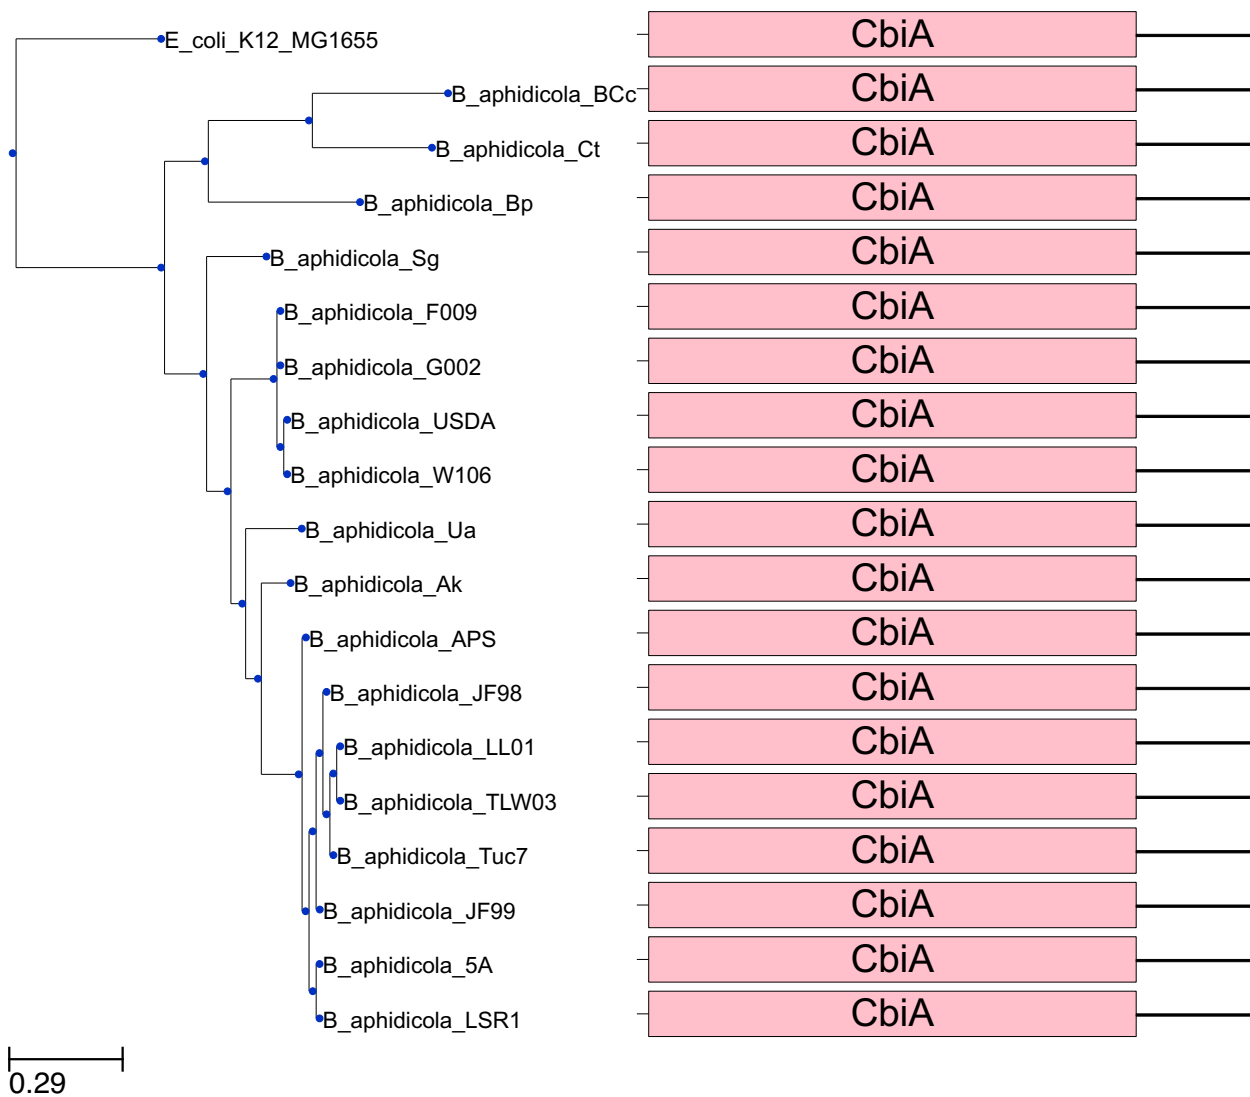

*minD*

NP\_415693.1

inhibitor of FtsZ ring polymerization; chromosome-membrane tethering protein; membrane ATPase of the MinCDEE system

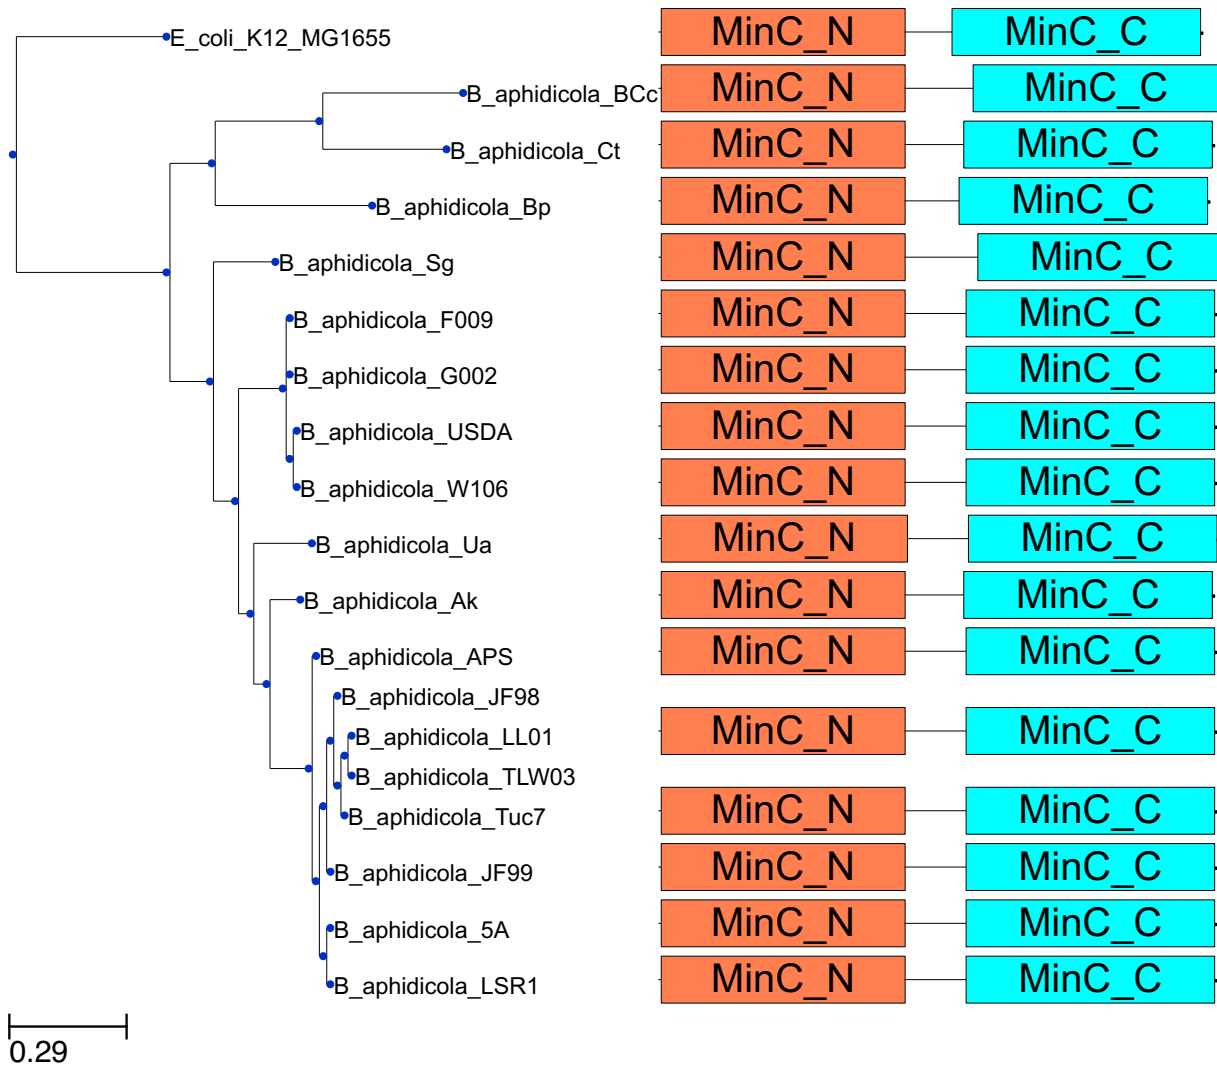

*minC*  
NP\_415694.1  
inhibitor of FtsZ ring polymerization

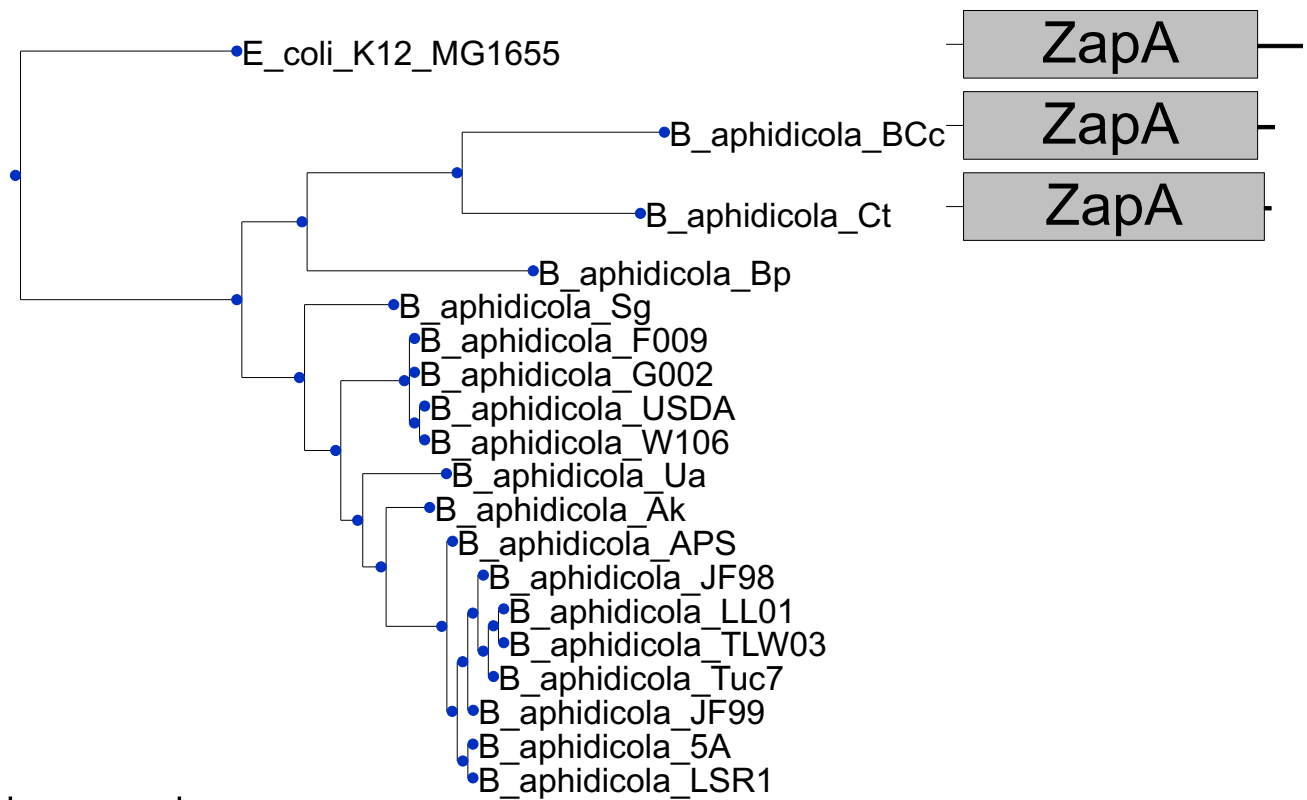

0.29

*zapA*  
NP\_417386.1  
FtsZ stabilizer

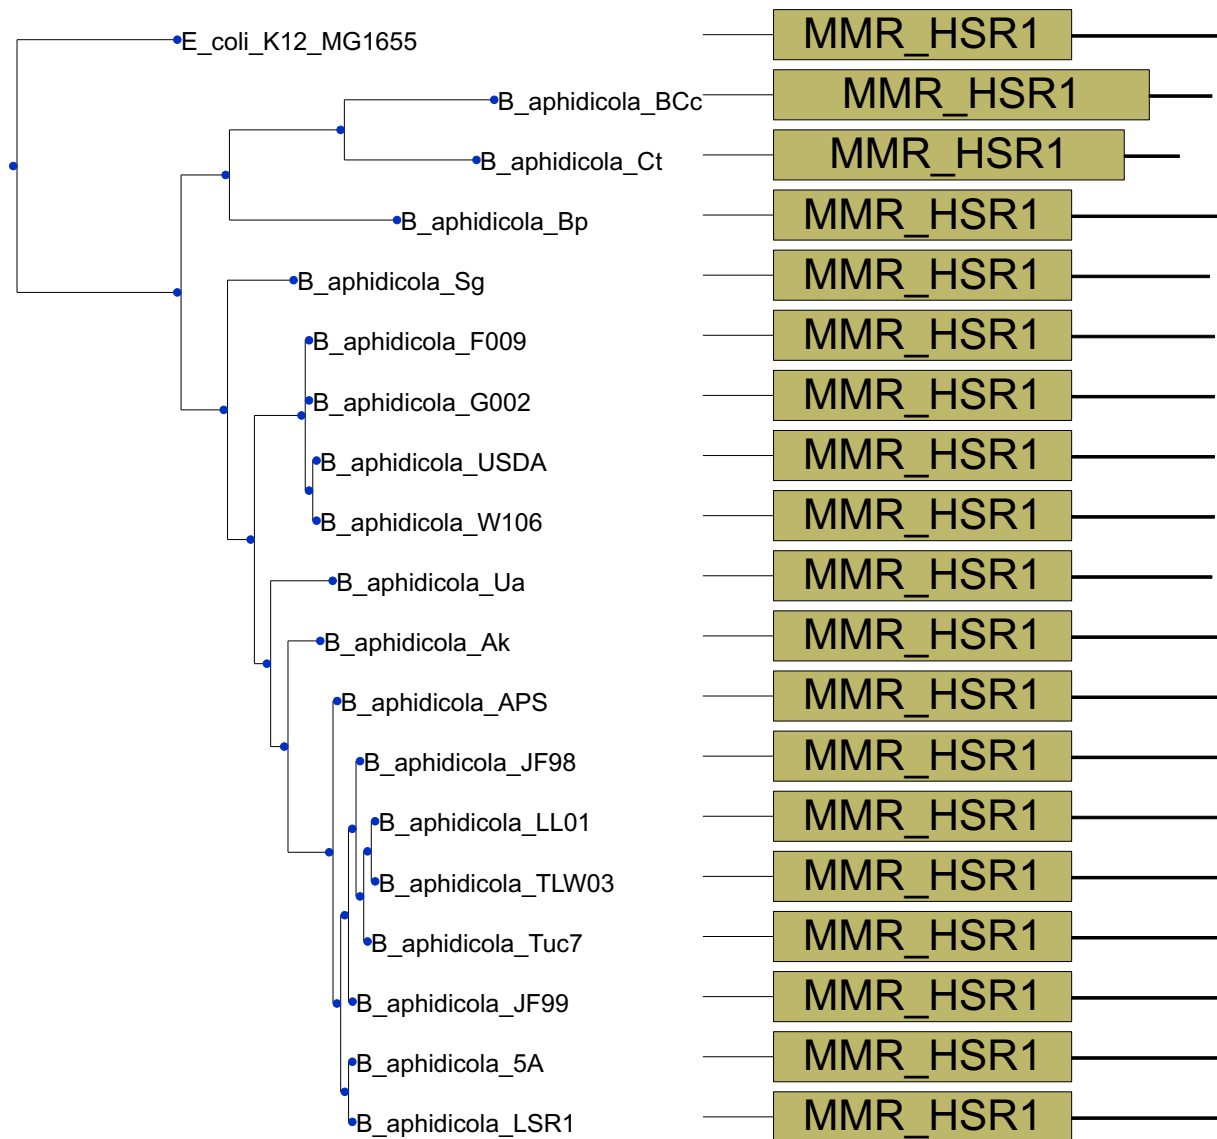

0.29

*yihA*  
NP\_418301.3  
cell division GTP-binding protein

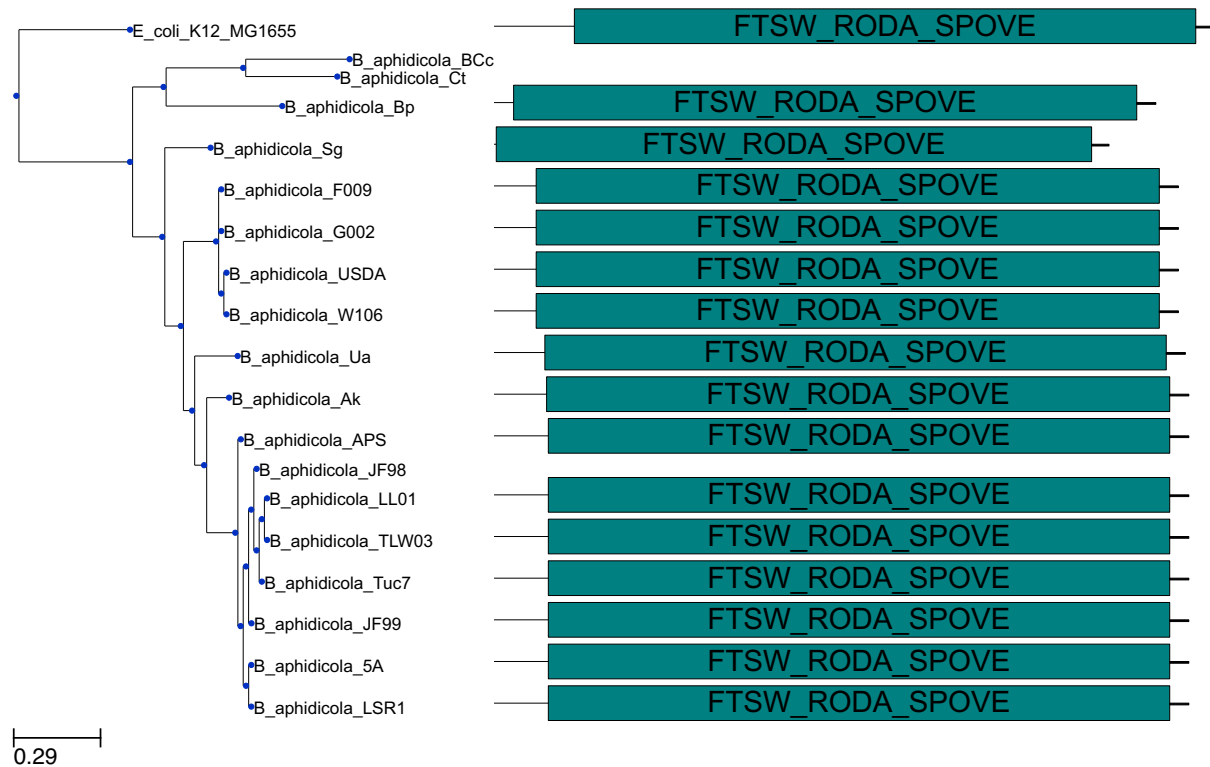

*ftsW*

NP\_414631.1

putative lipid II flippase; integral membrane protein; FtsZ ring stabilizer

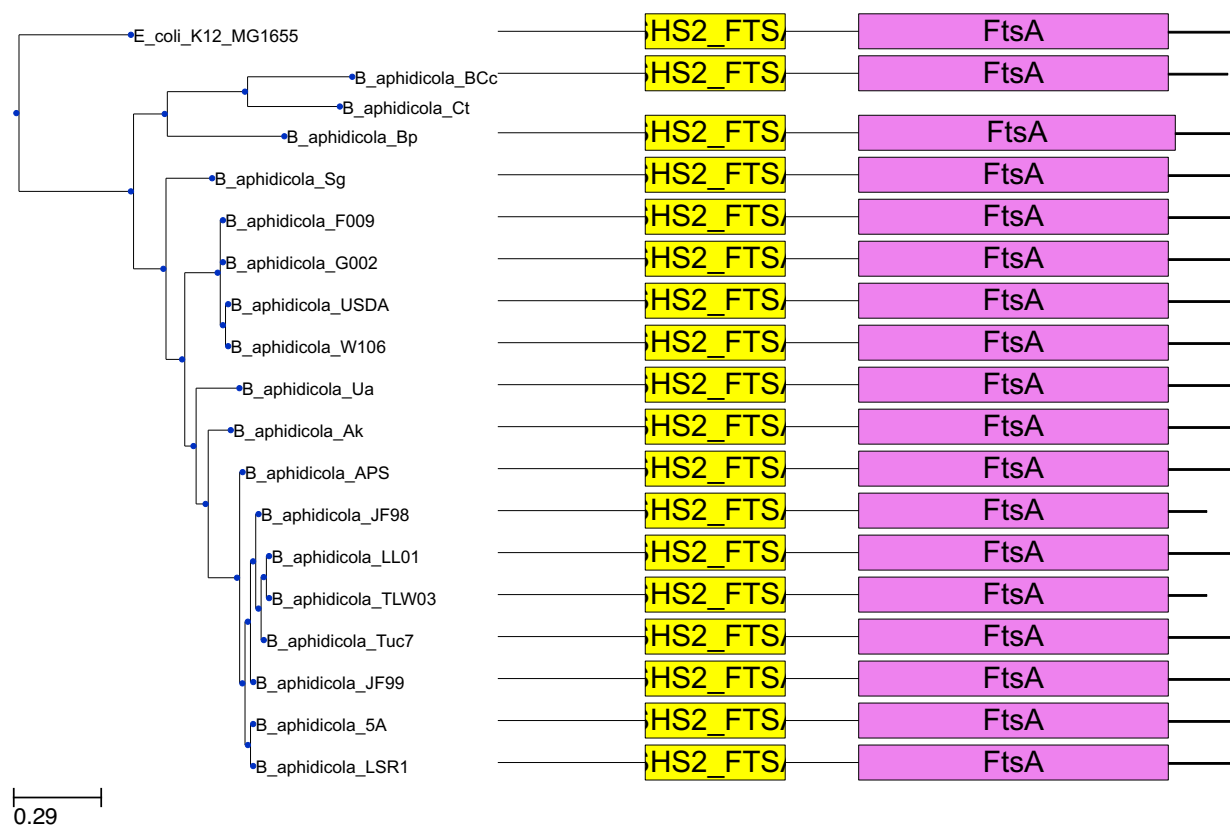

*ftsA*  
NP\_414636.1  
ATP-binding cell division FtsK recruitment protein



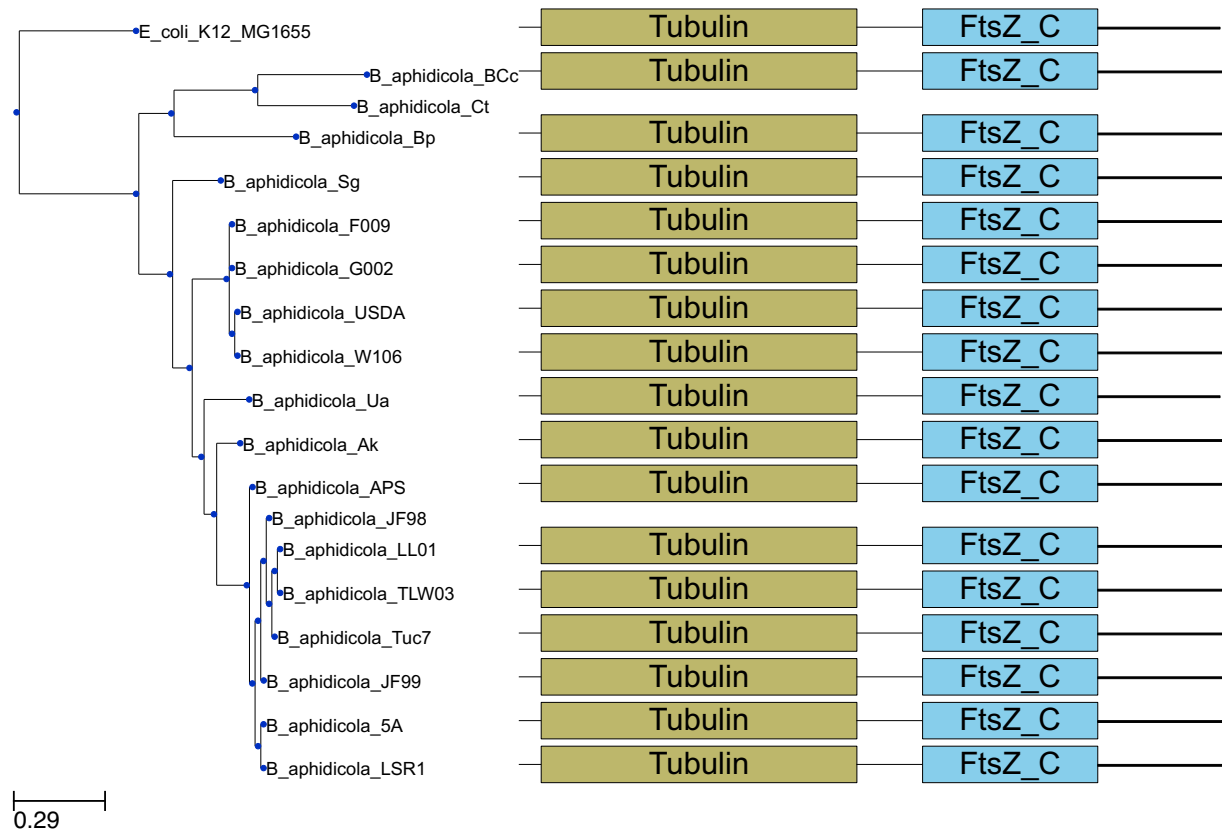

*ftsZ*  
NP\_414637.1  
GTP-binding tubulin-like cell division protein

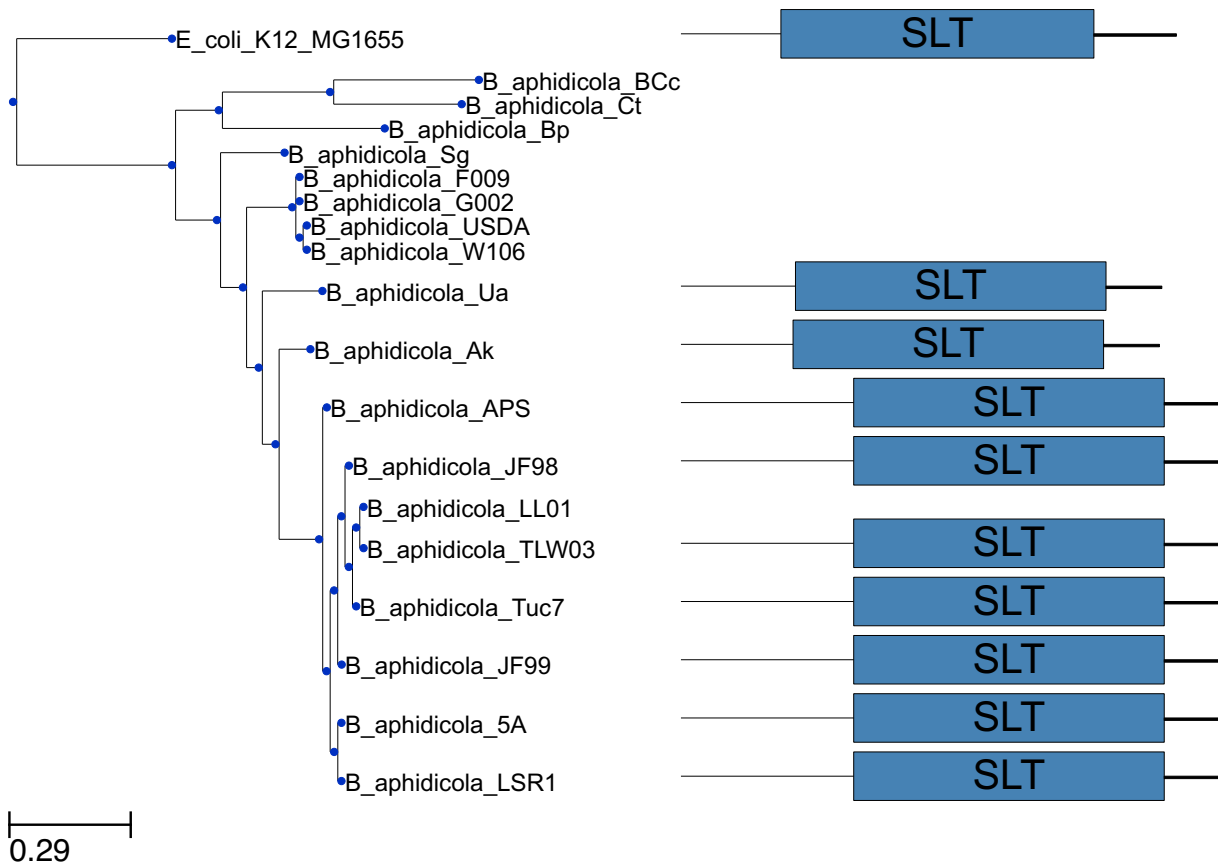

*emtA*  
NP\_415711.2  
lytic murein endotransglycosylase E

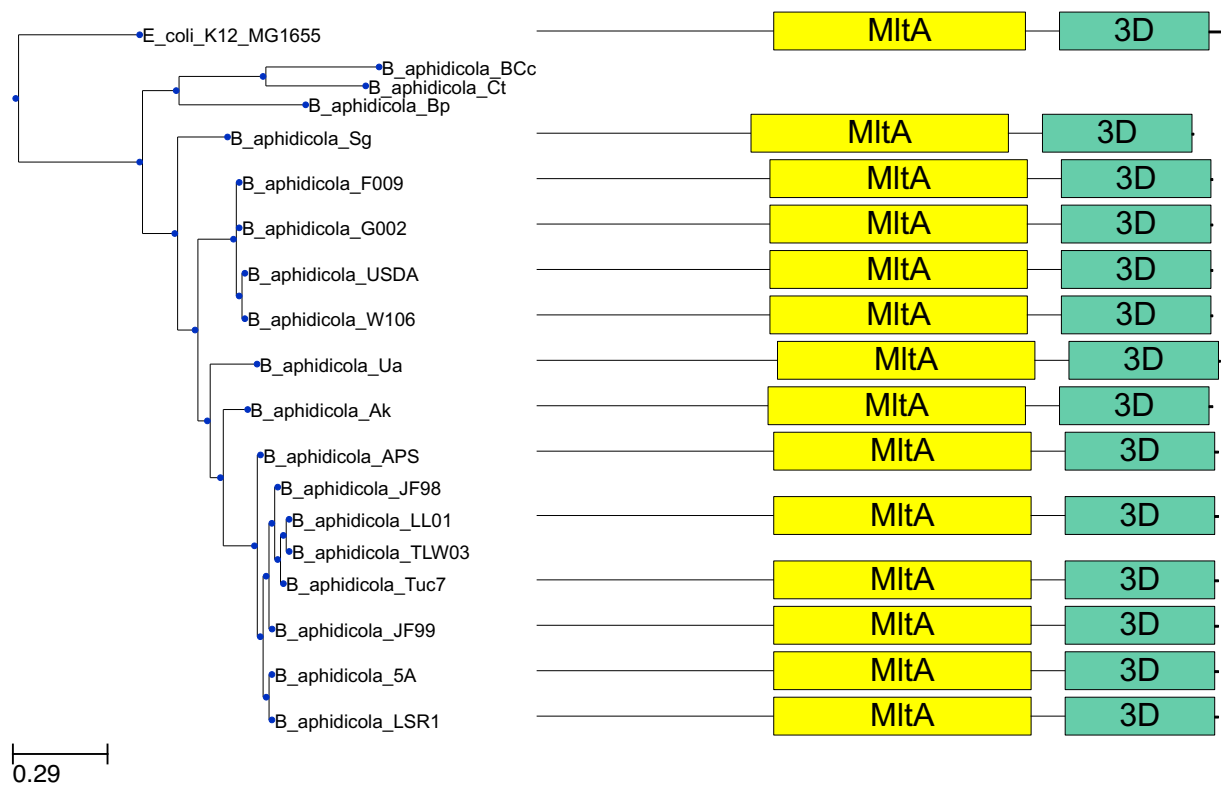

*mltA*

NP\_417293.1

membrane-bound lytic murein transglycosylase A

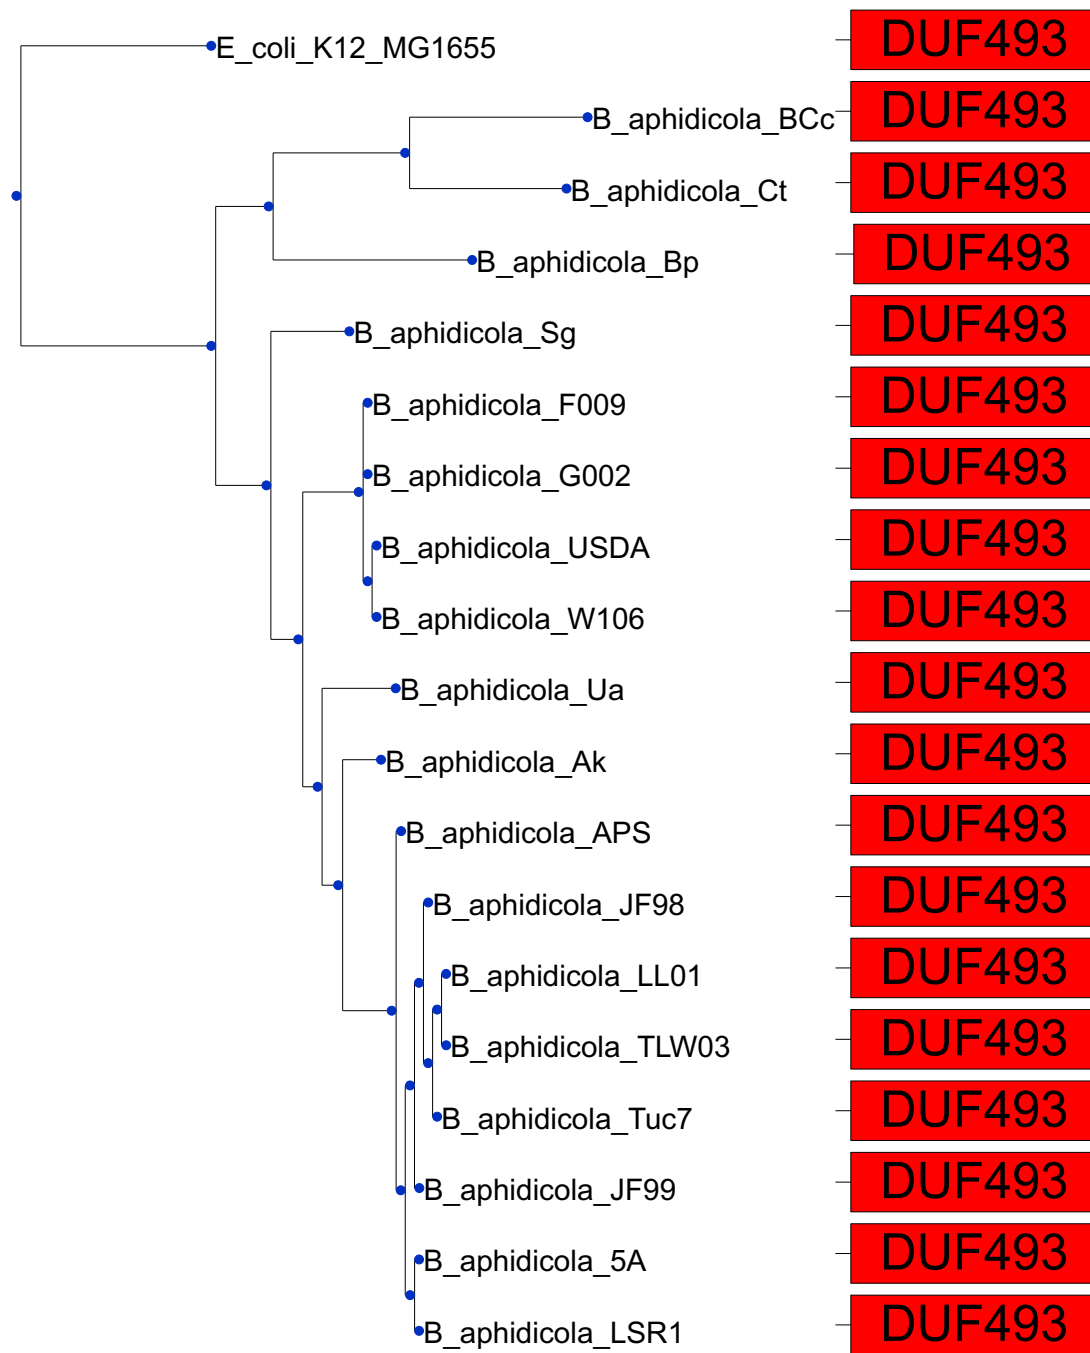

0.29

*ybeD*  
NP\_415164.1  
UPF0250 family protein

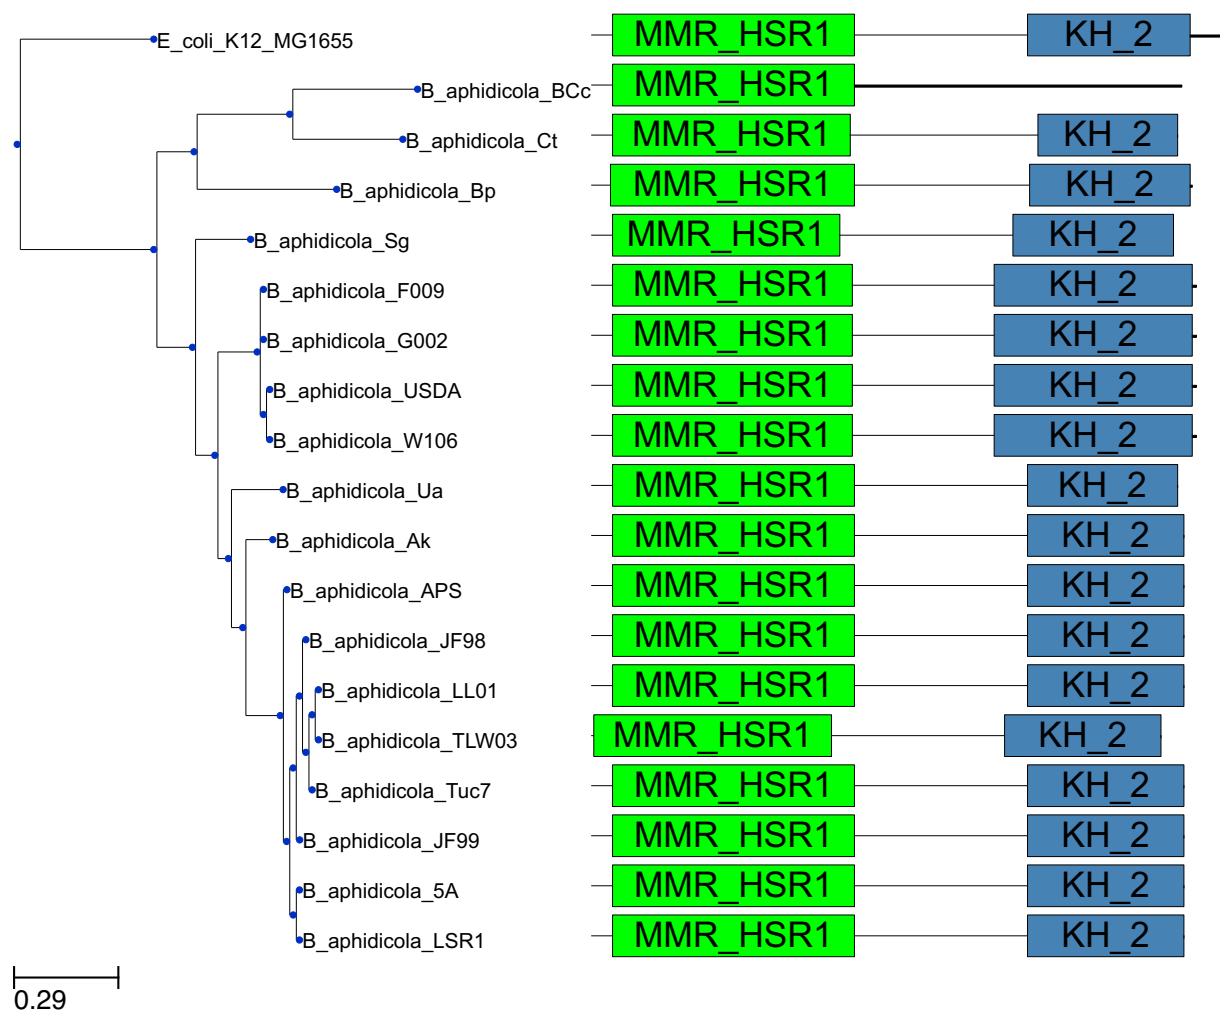

*era*  
NP\_417061.1  
membrane-associated, 16S rRNA-binding GTPase

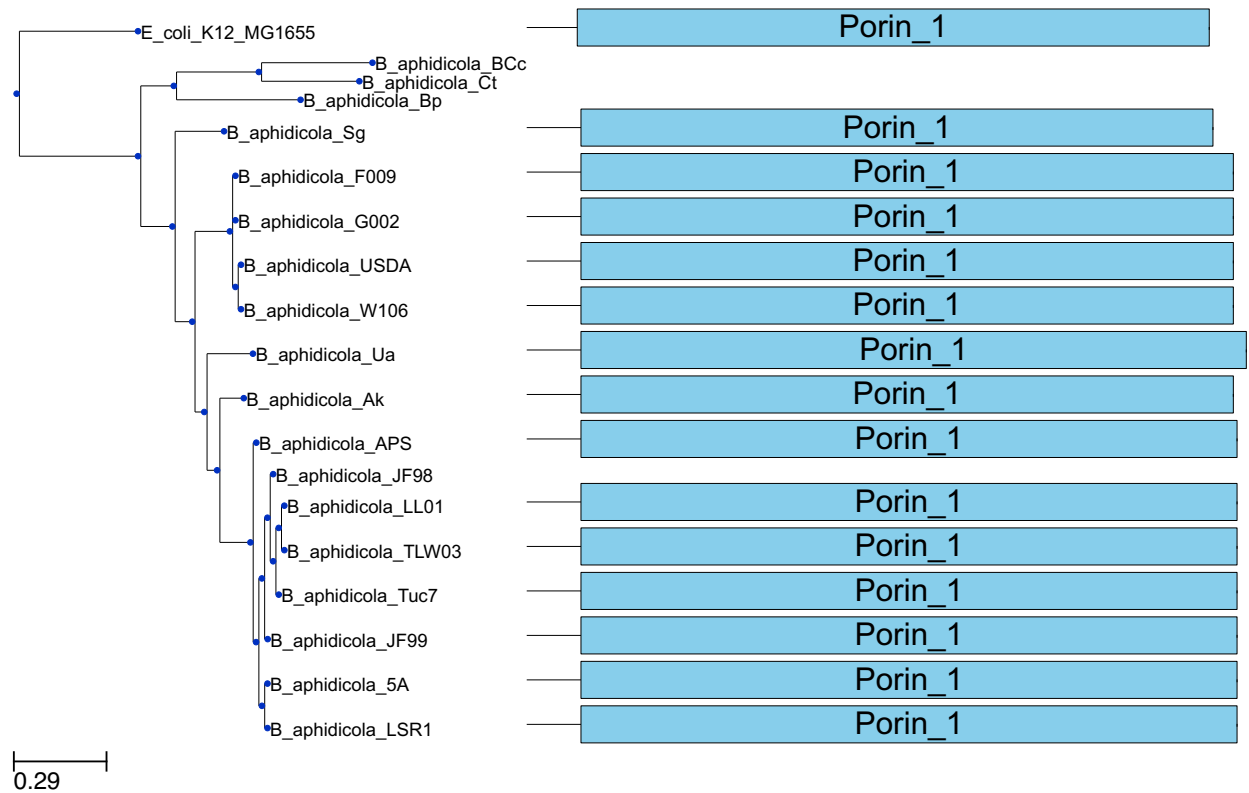

*phoE*

NP\_414776.1

outer membrane phosphoporin protein E

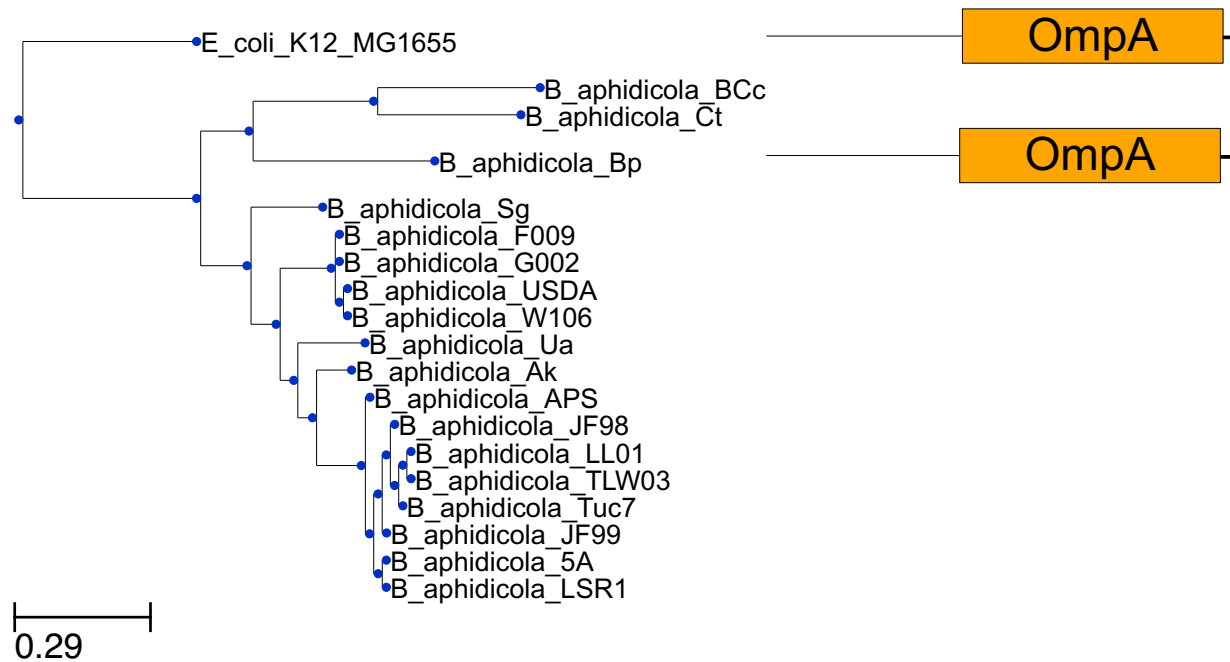

*pal*  
 NP\_415269.1  
 peptidoglycan-associated outer membrane lipoprotein

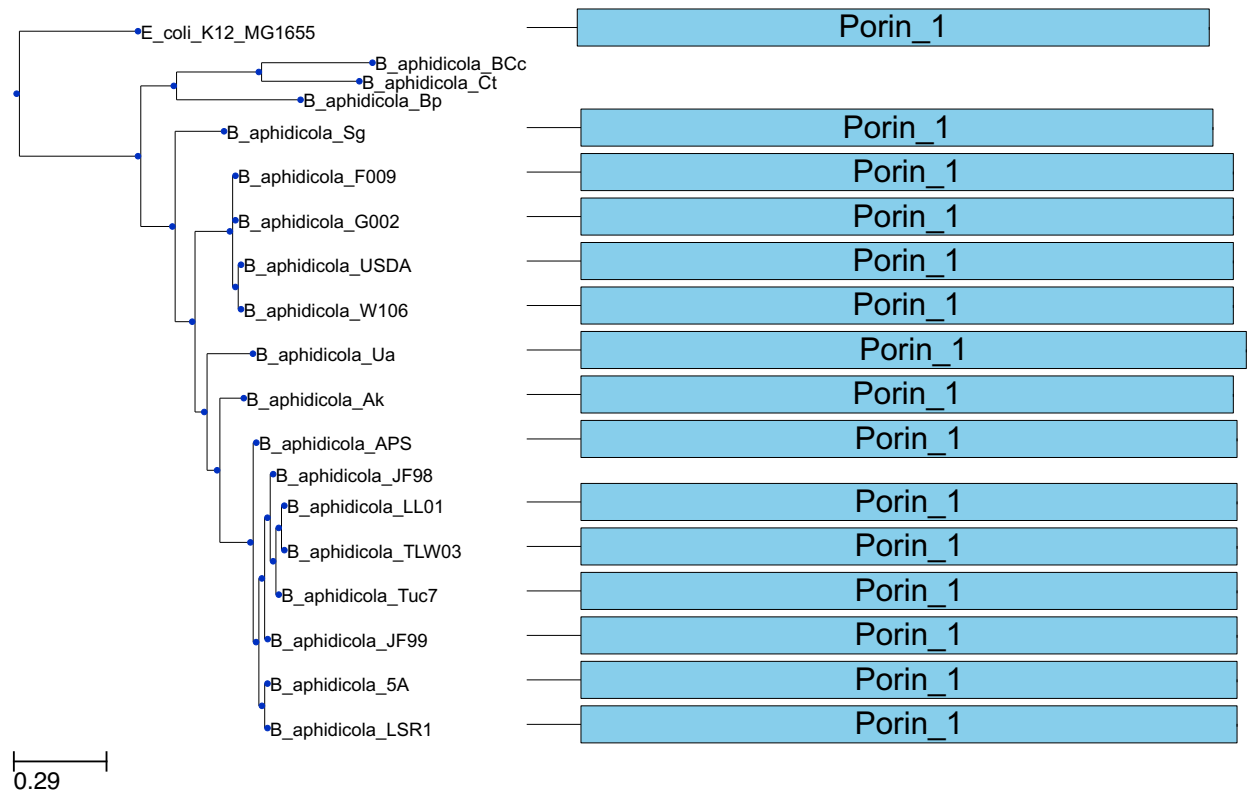

*ompF*  
 NP\_415449.1  
 outer membrane porin 1a (Ia;b;F)





*ompC*  
NP\_416719.1  
outer membrane porin protein C

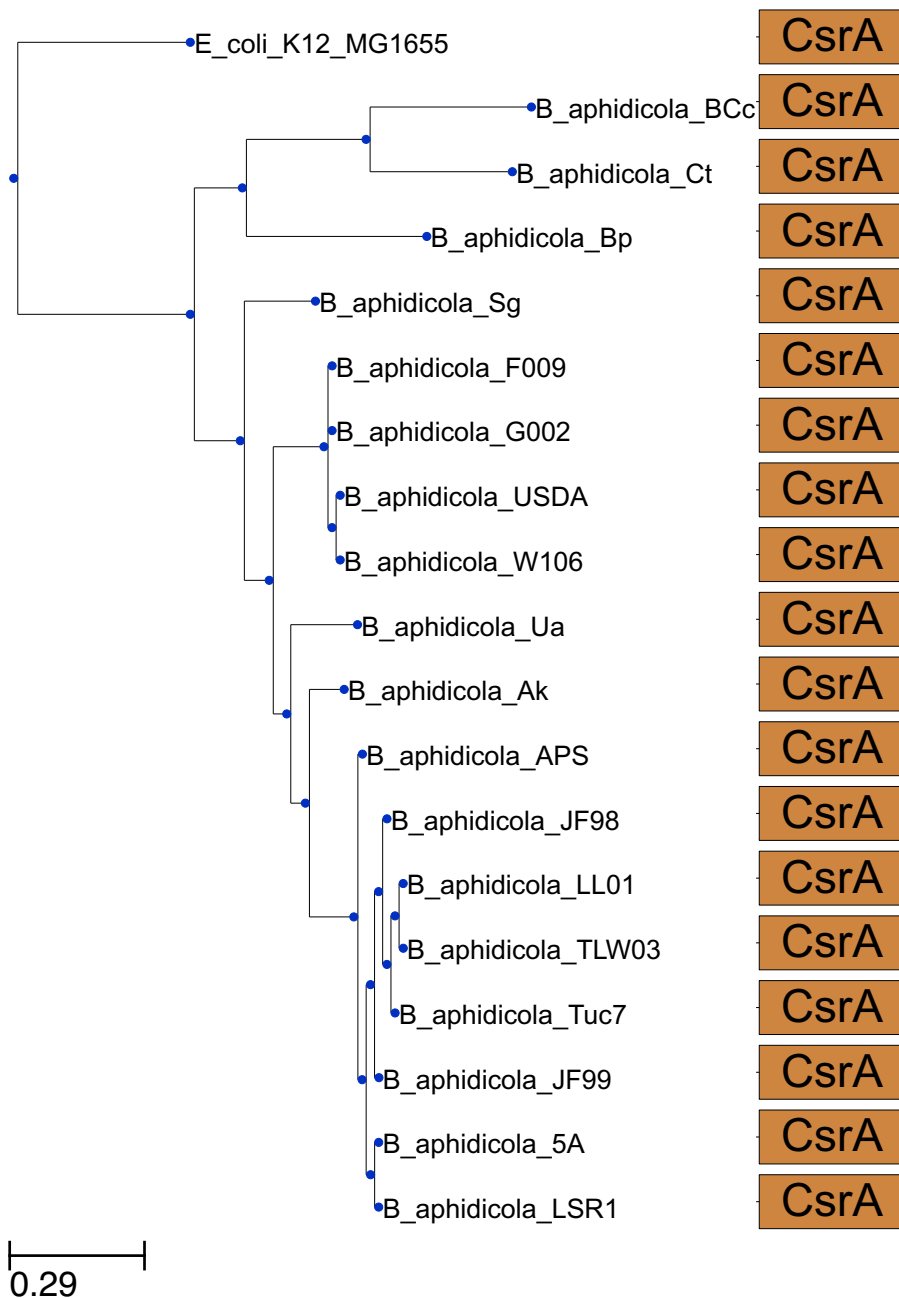

*csrA*  
NP\_417176.1  
pleiotropic regulatory protein for carbon source metabolism

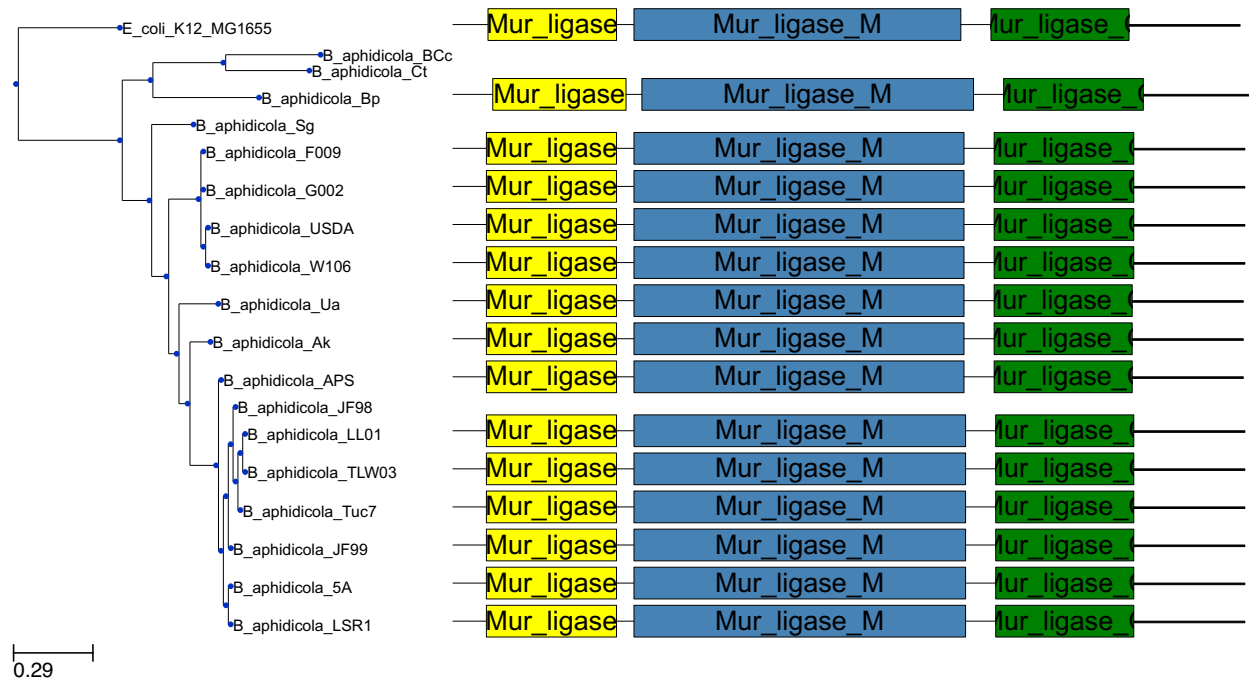

*murE*

NP\_414627.1

UDP-N-acetylmuramoyl-L-alanyl-D-glutamate:meso- diaminopimelate ligase

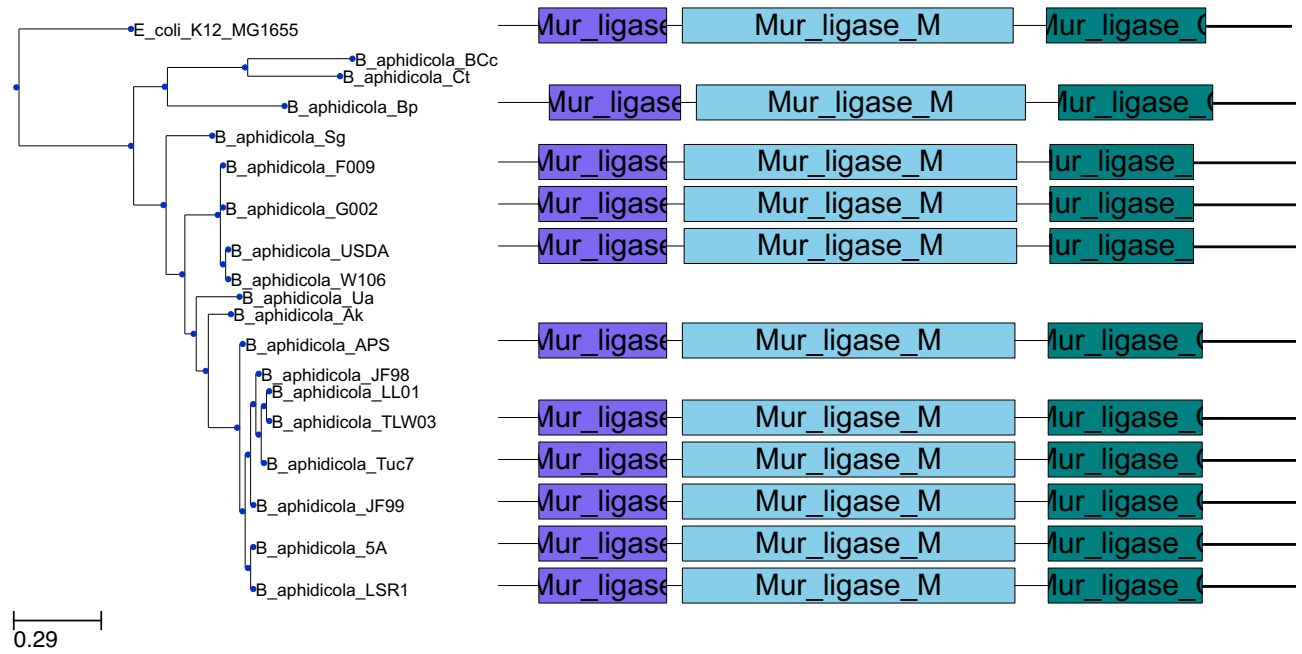

*murF*

NP\_414628.1

UDP-N-acetylmuramoyl-tripeptide:D-alanyl-D- alanine ligase

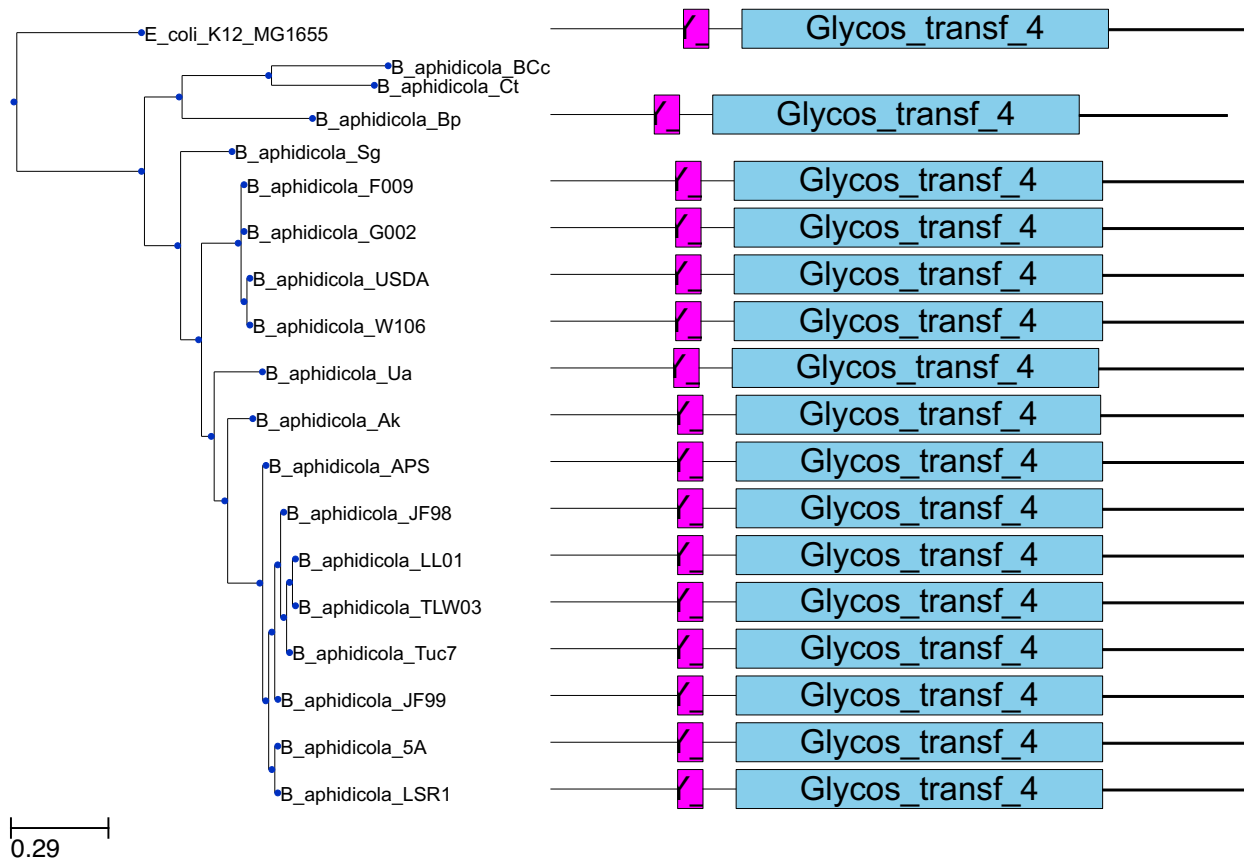

*mraY*  
NP\_414629.1  
phospho-N-acetylmuramoyl-pentapeptide transferase

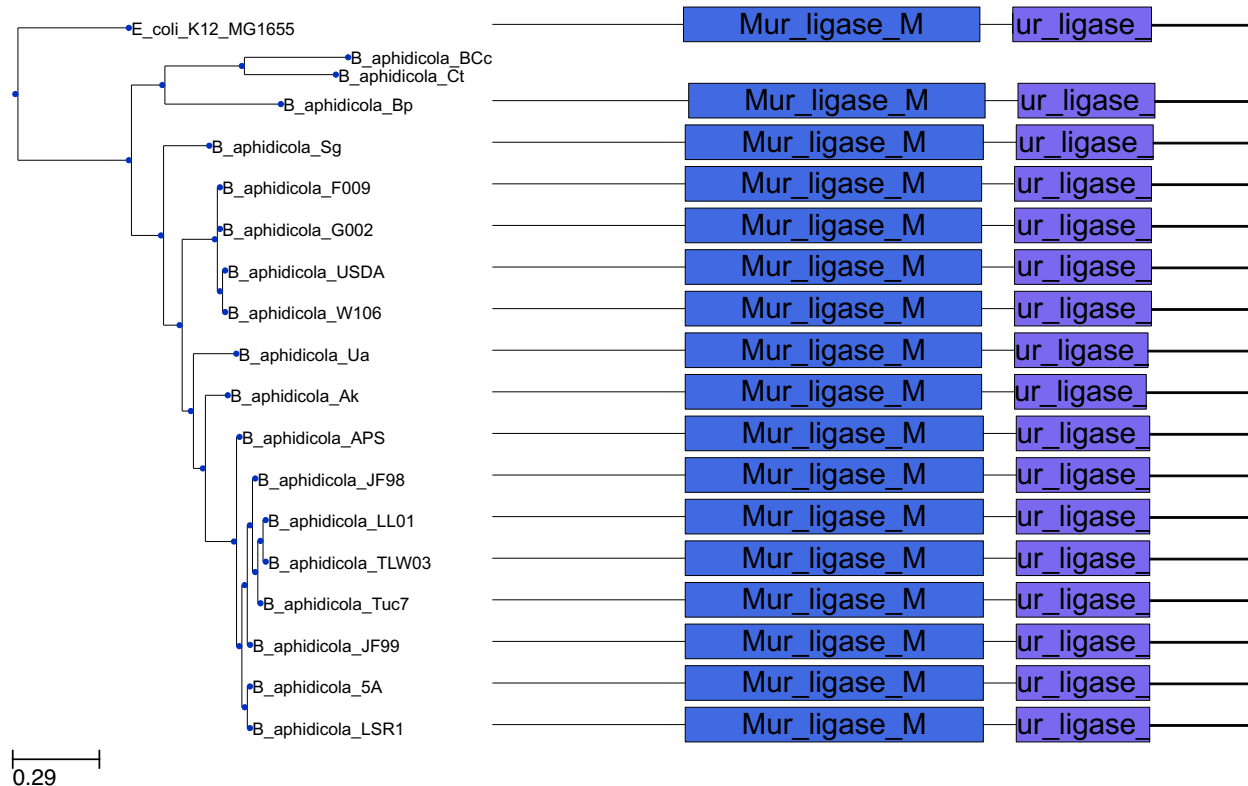

*murD*  
 NP\_414630.1  
 UDP-N-acetylmuramoyl-L-alanine:D-glutamate ligase

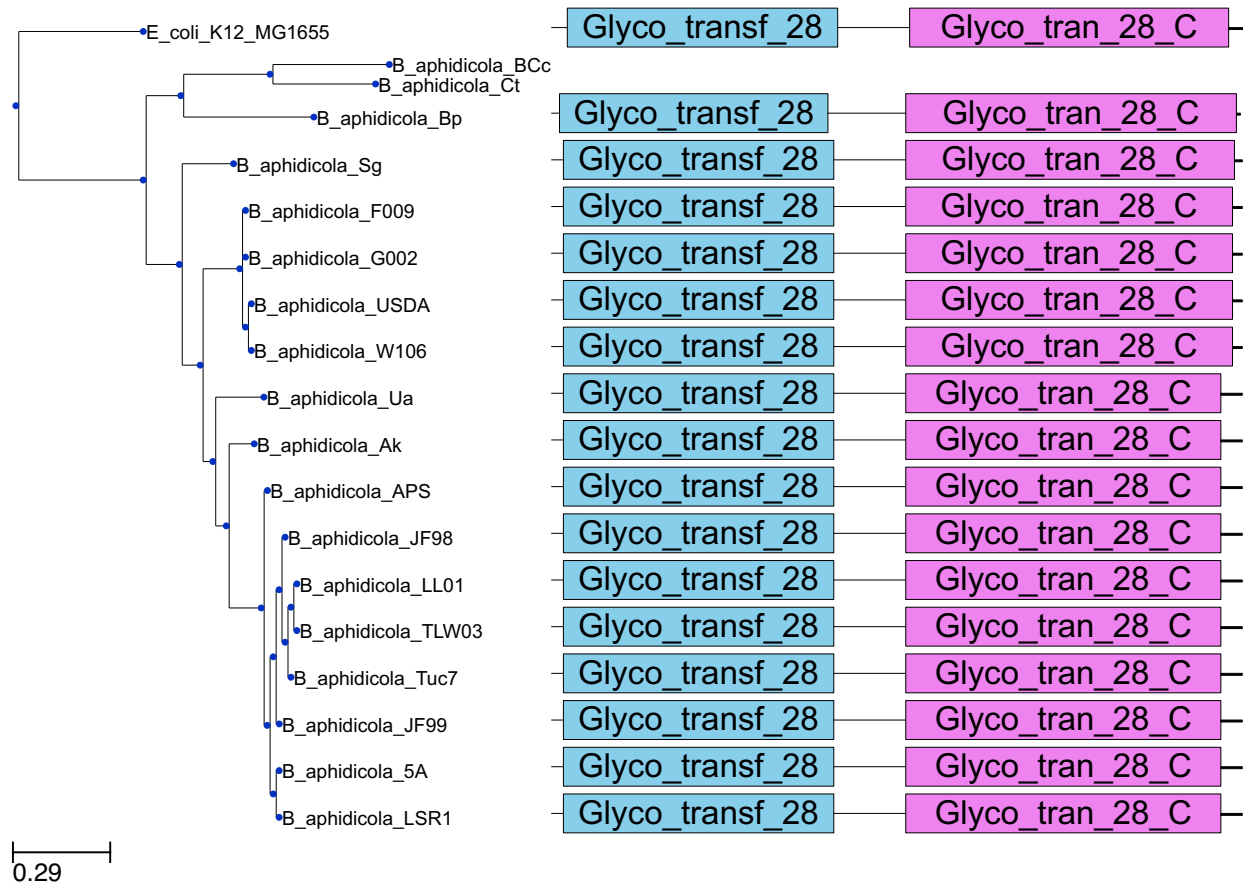

*murG*  
NP\_414632.1  
N-acetylglucosaminyl transferase

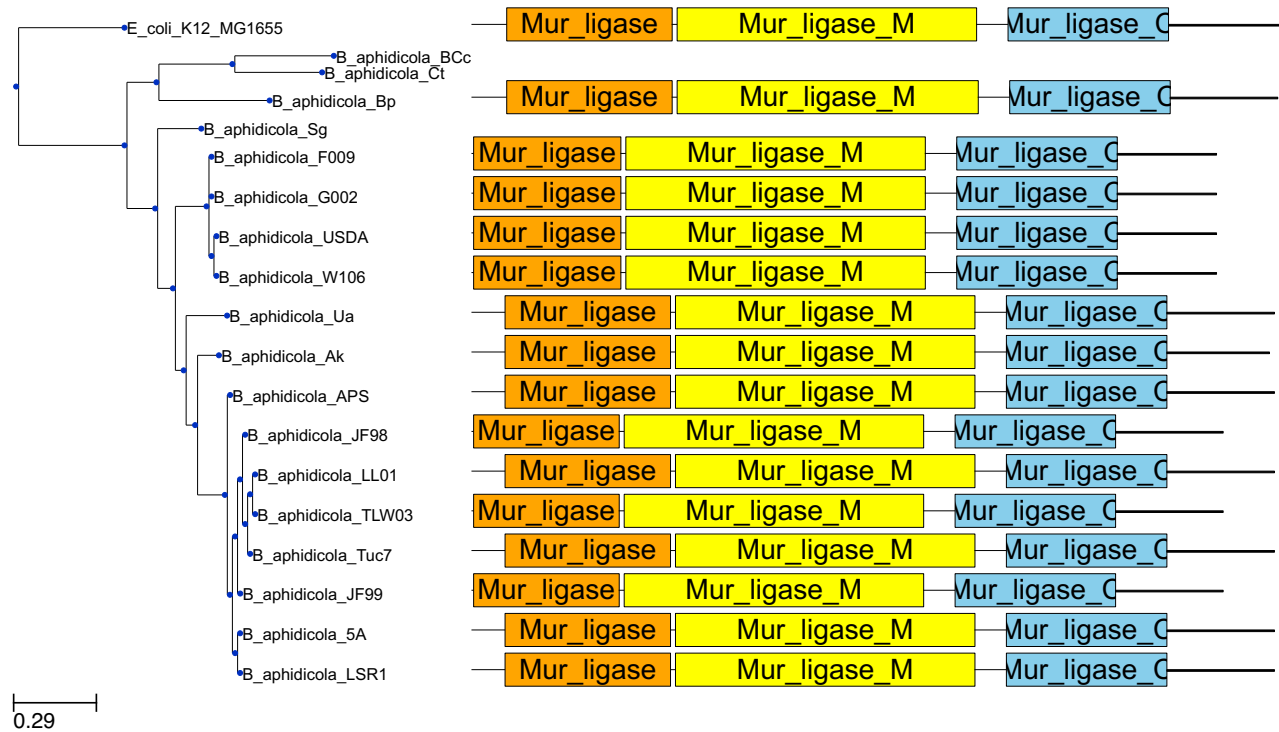

*murC*  
NP\_414633.1  
UDP-N-acetylmuramate:L-alanine ligase



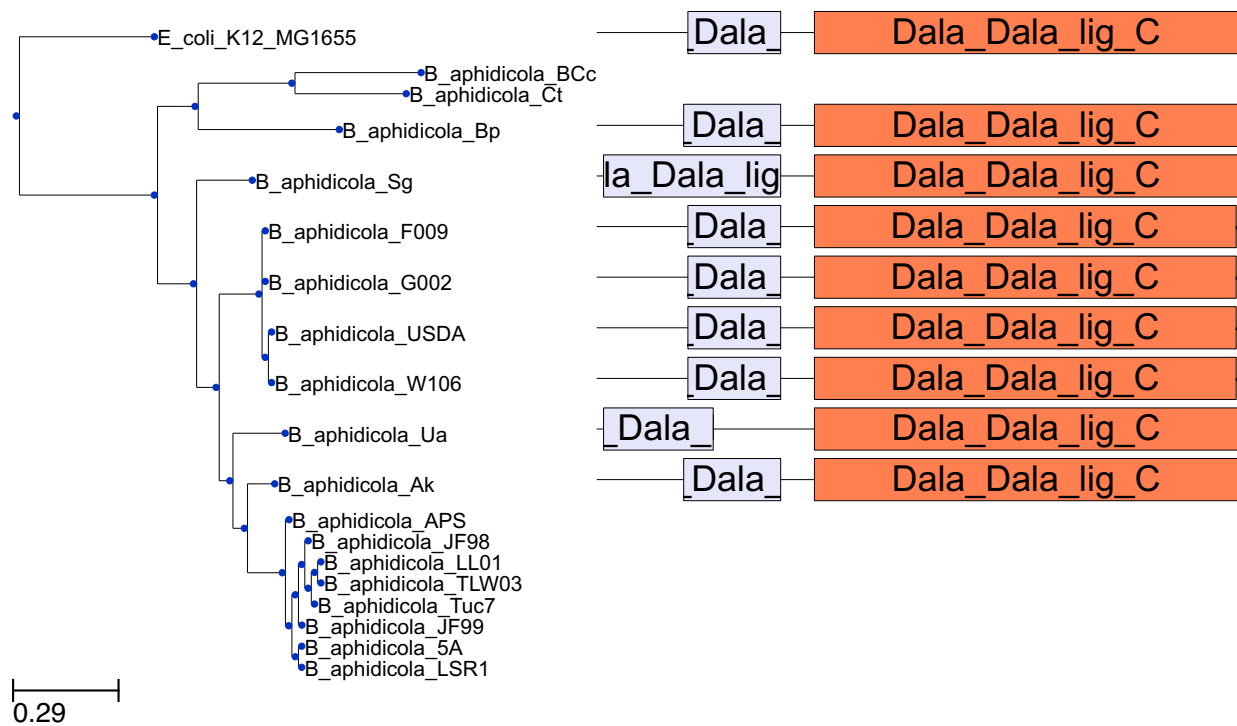

*ddlB*  
NP\_414634.1  
D-alanine:D-alanine ligase

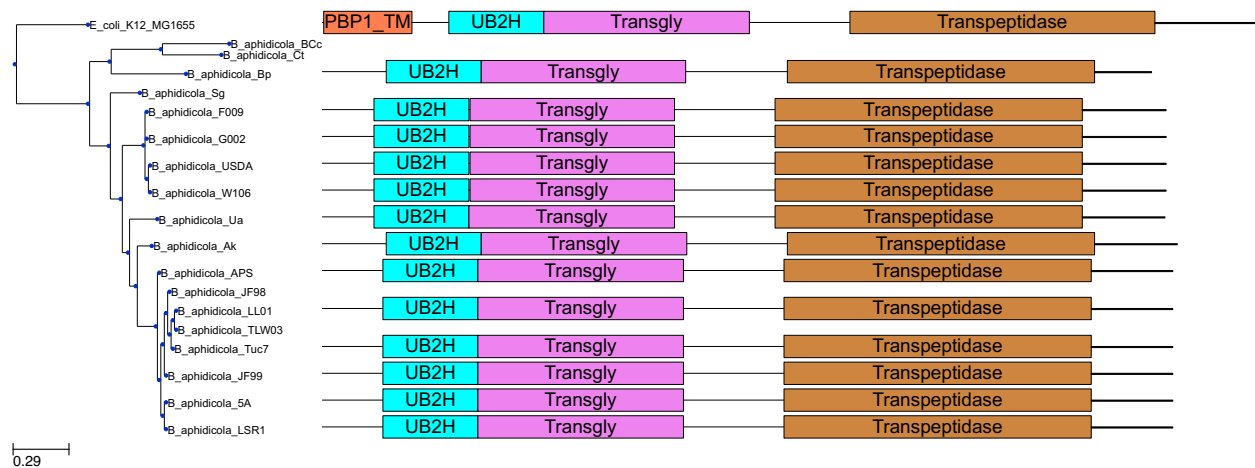

*mrcB*

NP\_414691.1

fused glycosyl transferase and transpeptidase

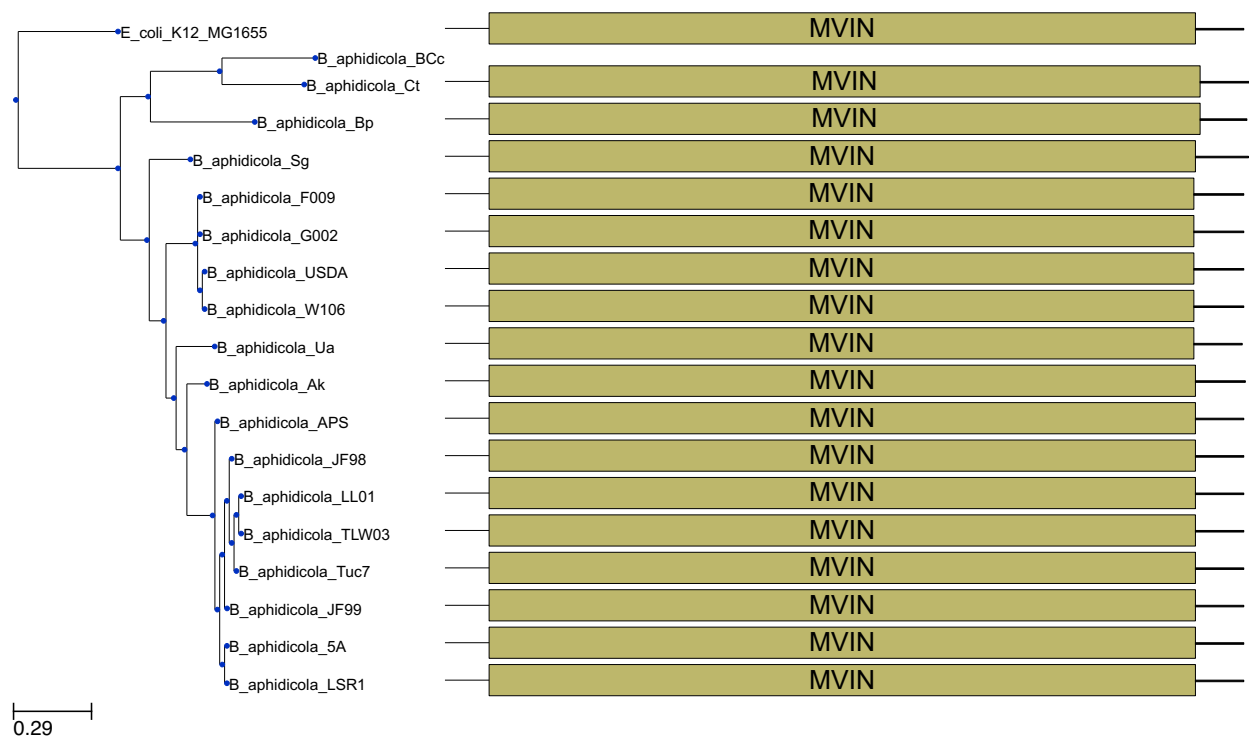

*mviN*

NP\_415587.1

putative lipid II flippase

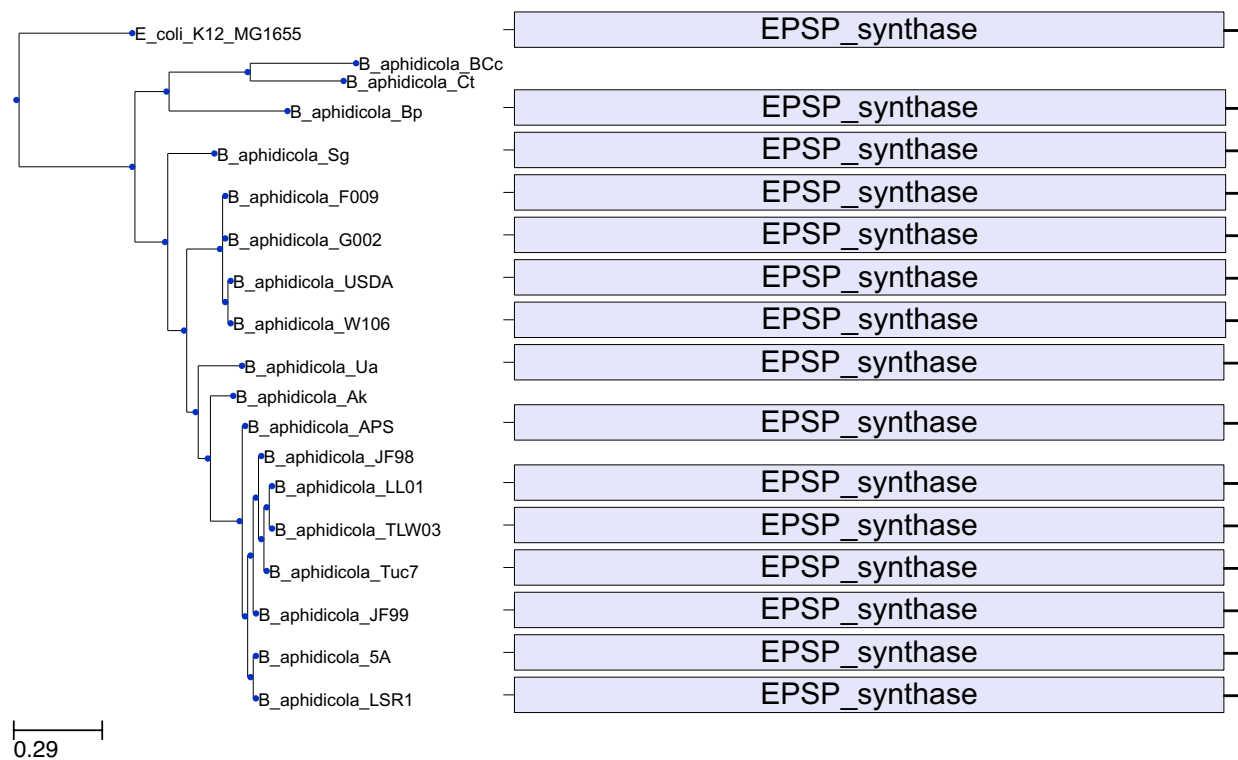

*murA*  
NP\_417656.1  
UDP-N-acetylglucosamine 1-carboxyvinyltransferase

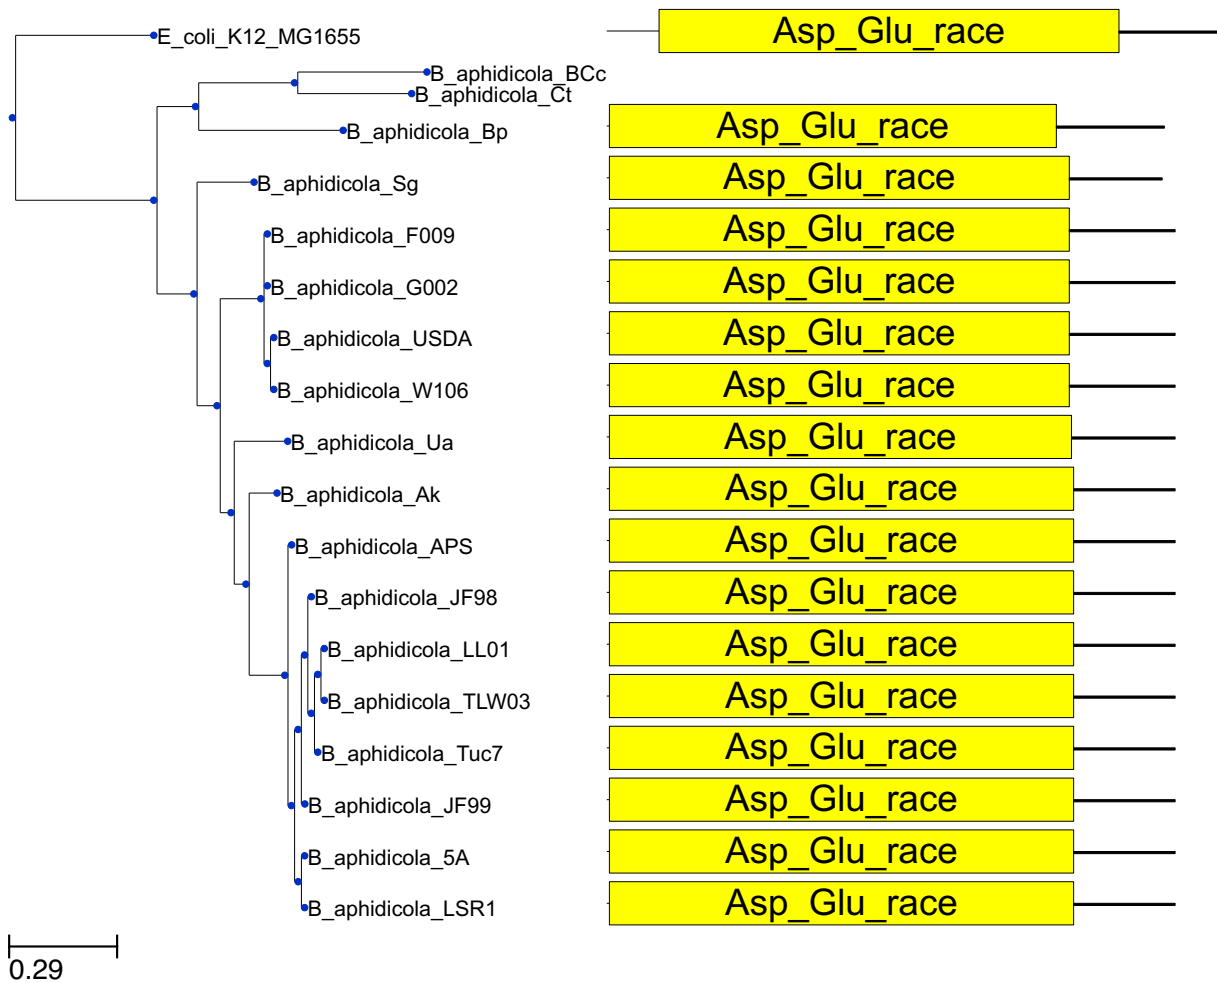

*murl*  
NP\_418402.2  
glutamate racemase

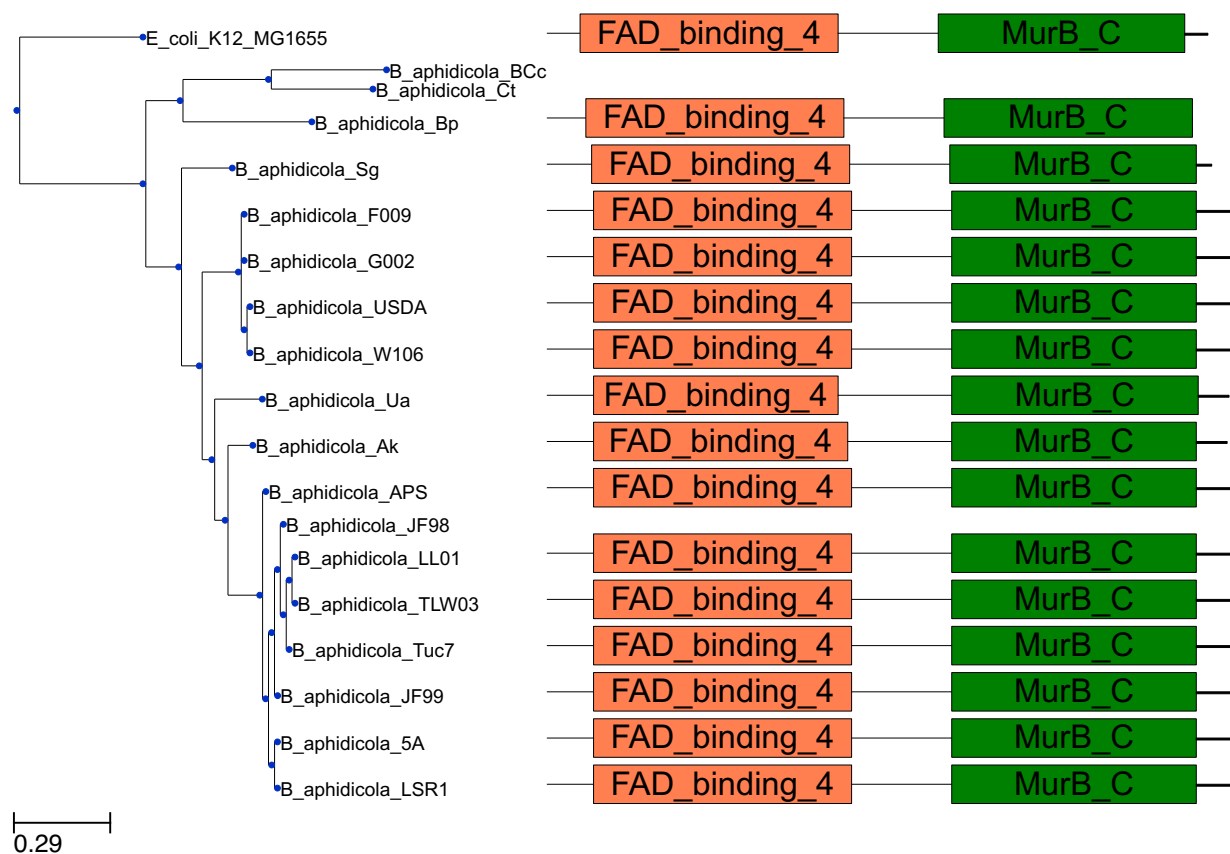

*murB*

NP\_418403.1

"UDP-N-acetylenolpyruvoylglucosamine reductase, FAD-binding"

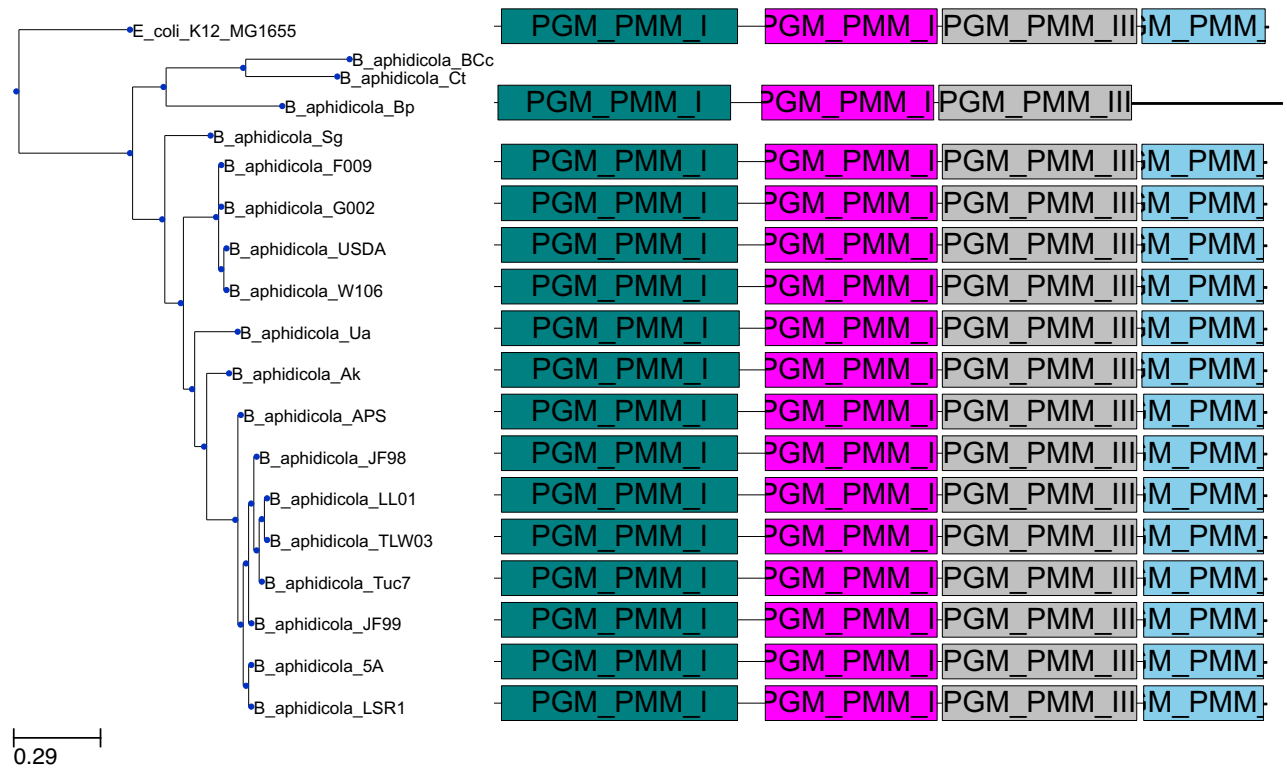

*glmM*  
NP\_417643.1  
phosphoglucosamine mutase

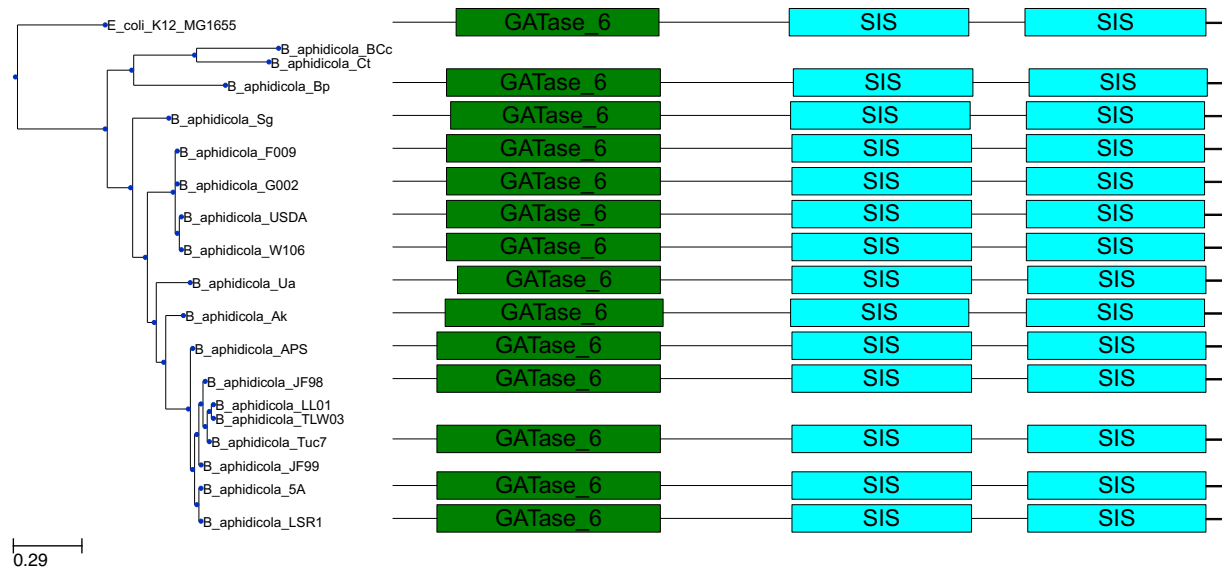

*glms*

NP\_418185.1

L-glutamine:D-fructose-6-phosphate aminotransferase



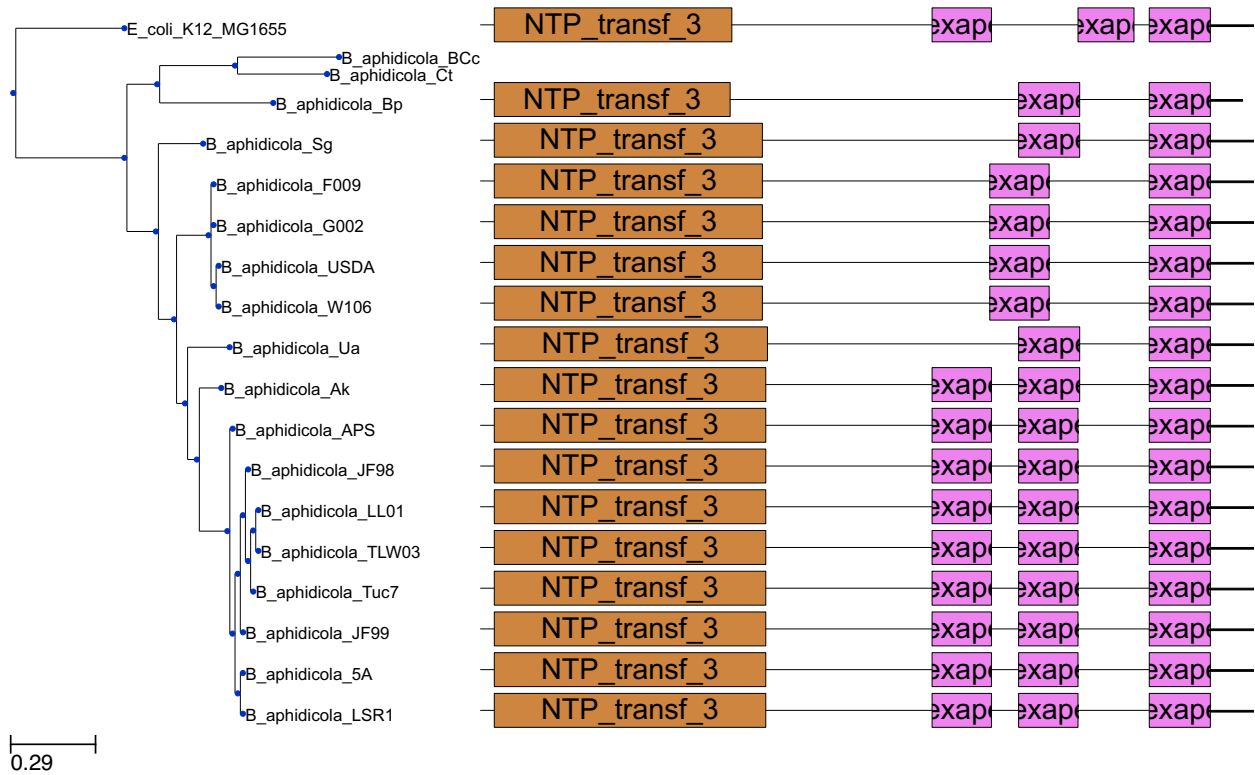

*glmU*

NP\_418186.1

fused N-acetyl glucosamine-1-phosphate uridyltransferase/glucosamine-1-phosphate acetyl transferase

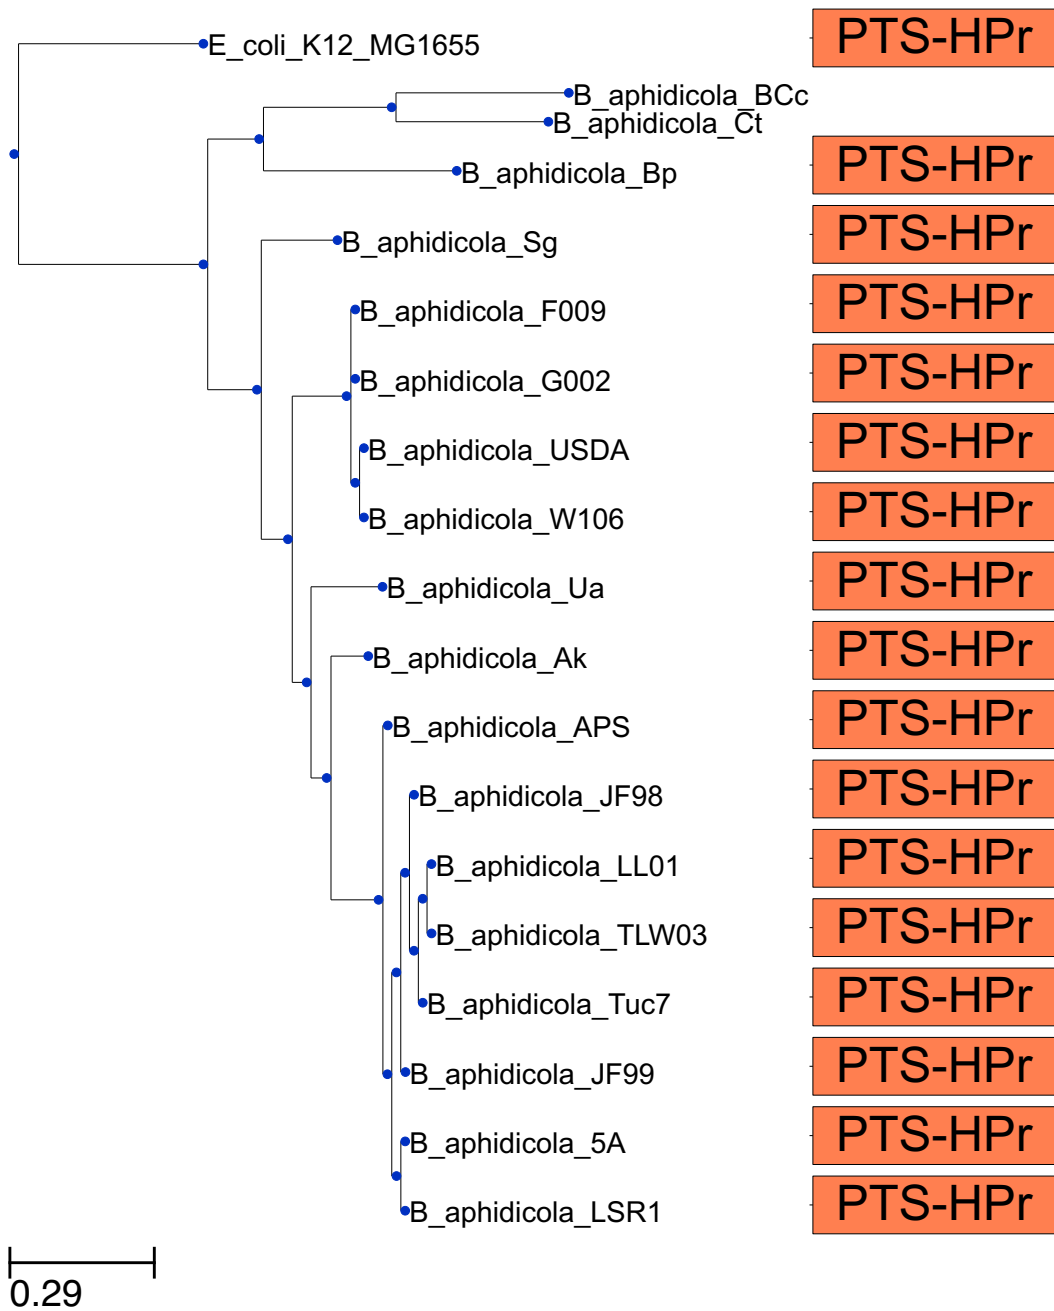

*ptsH*

NP\_416910.1

phosphohistidinoprotein-hexose phosphotransferase component of PTS system (Hpr)

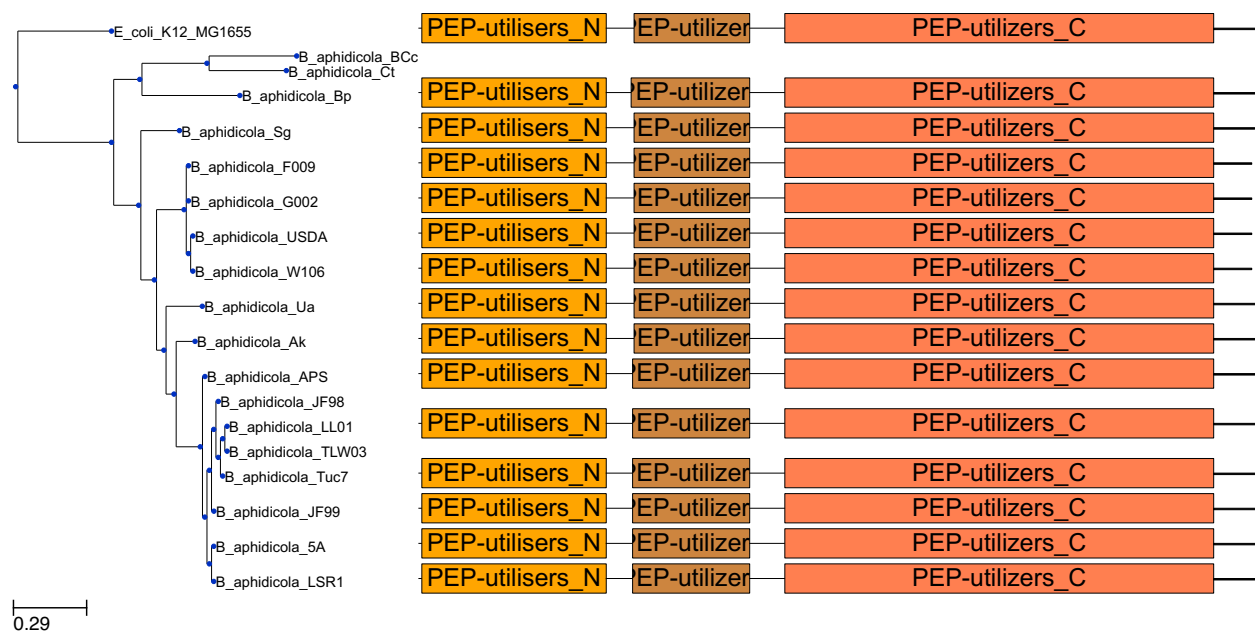

*ptsI*

NP\_416911.1

PEP-protein phosphotransferase of PTS system (enzyme I)

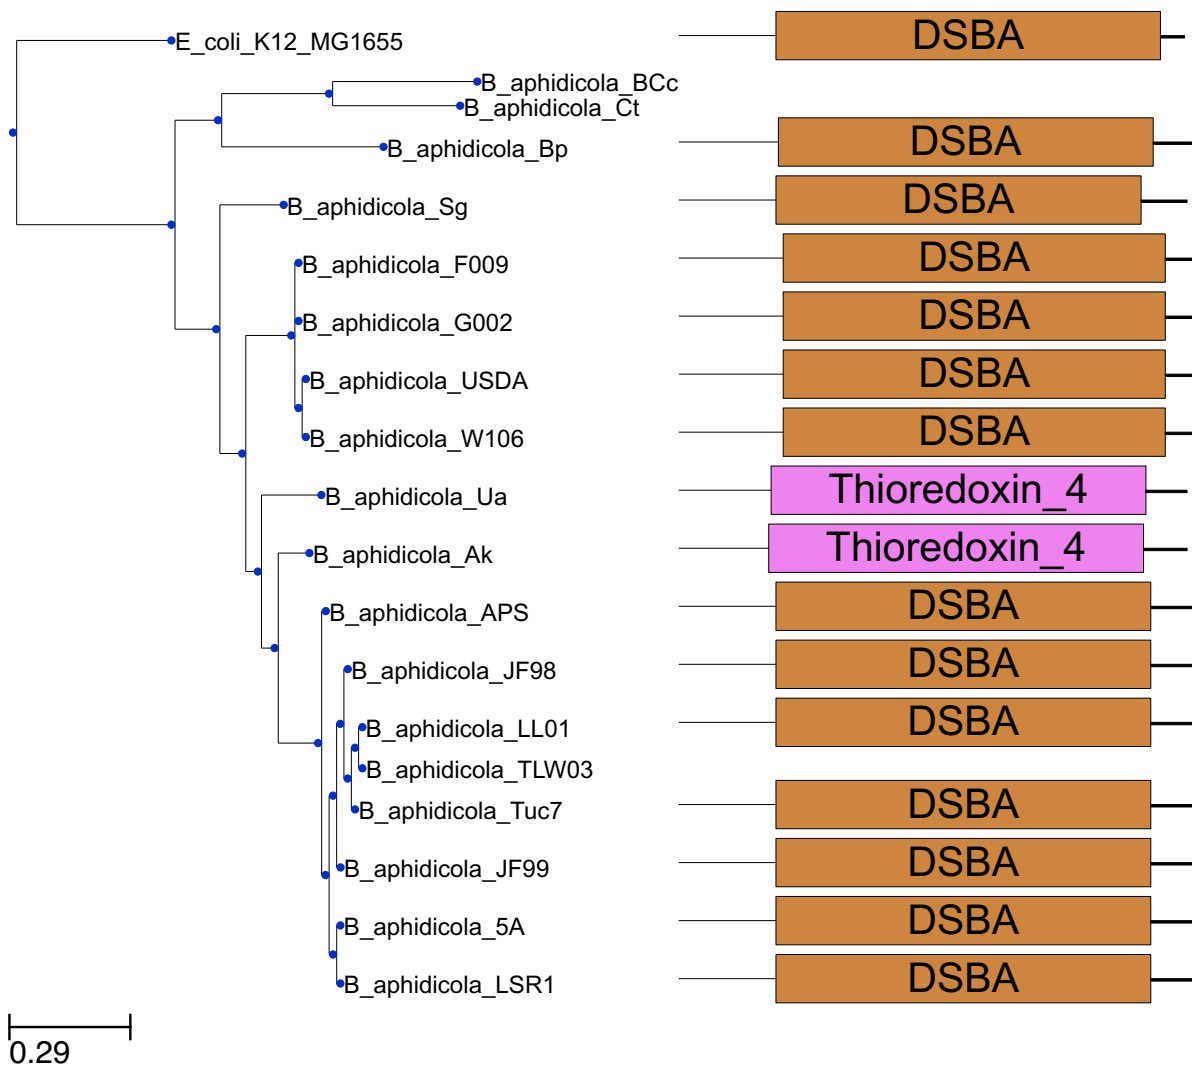

*dsbA*  
NP\_418297.1  
periplasmic protein disulfide isomerase I

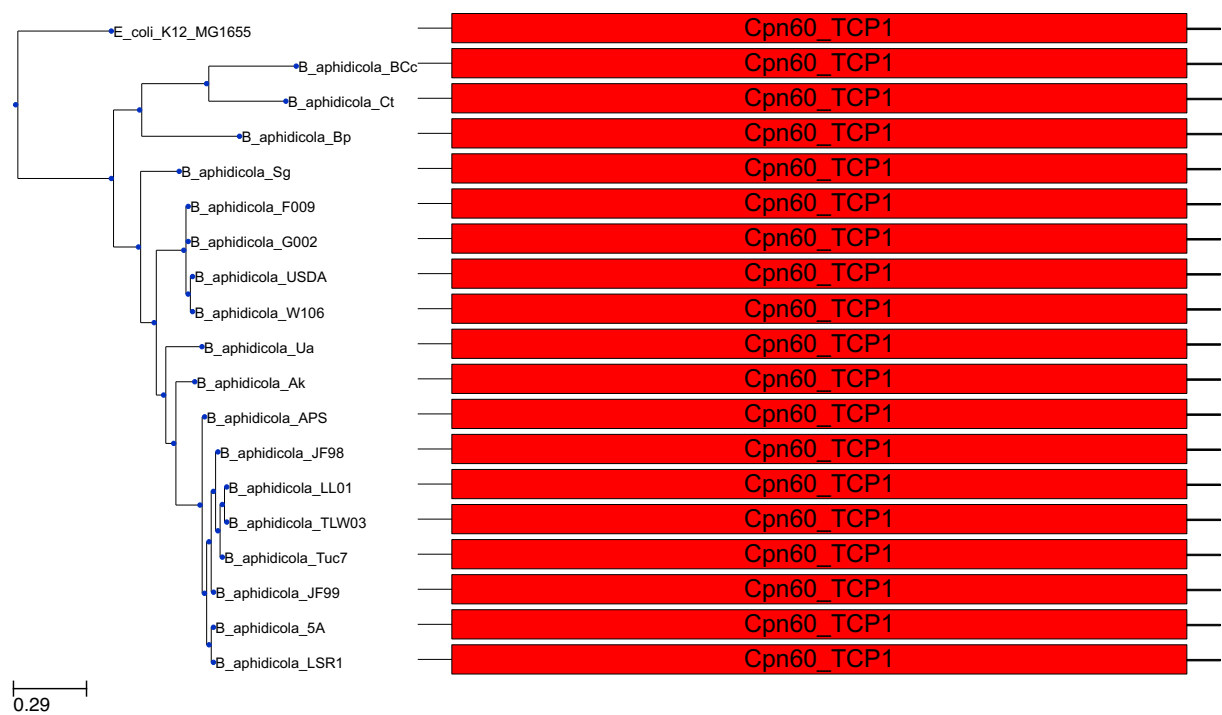

*groL*

NP\_418567.1

"Cpn60 chaperonin GroEL, large subunit of GroESL"

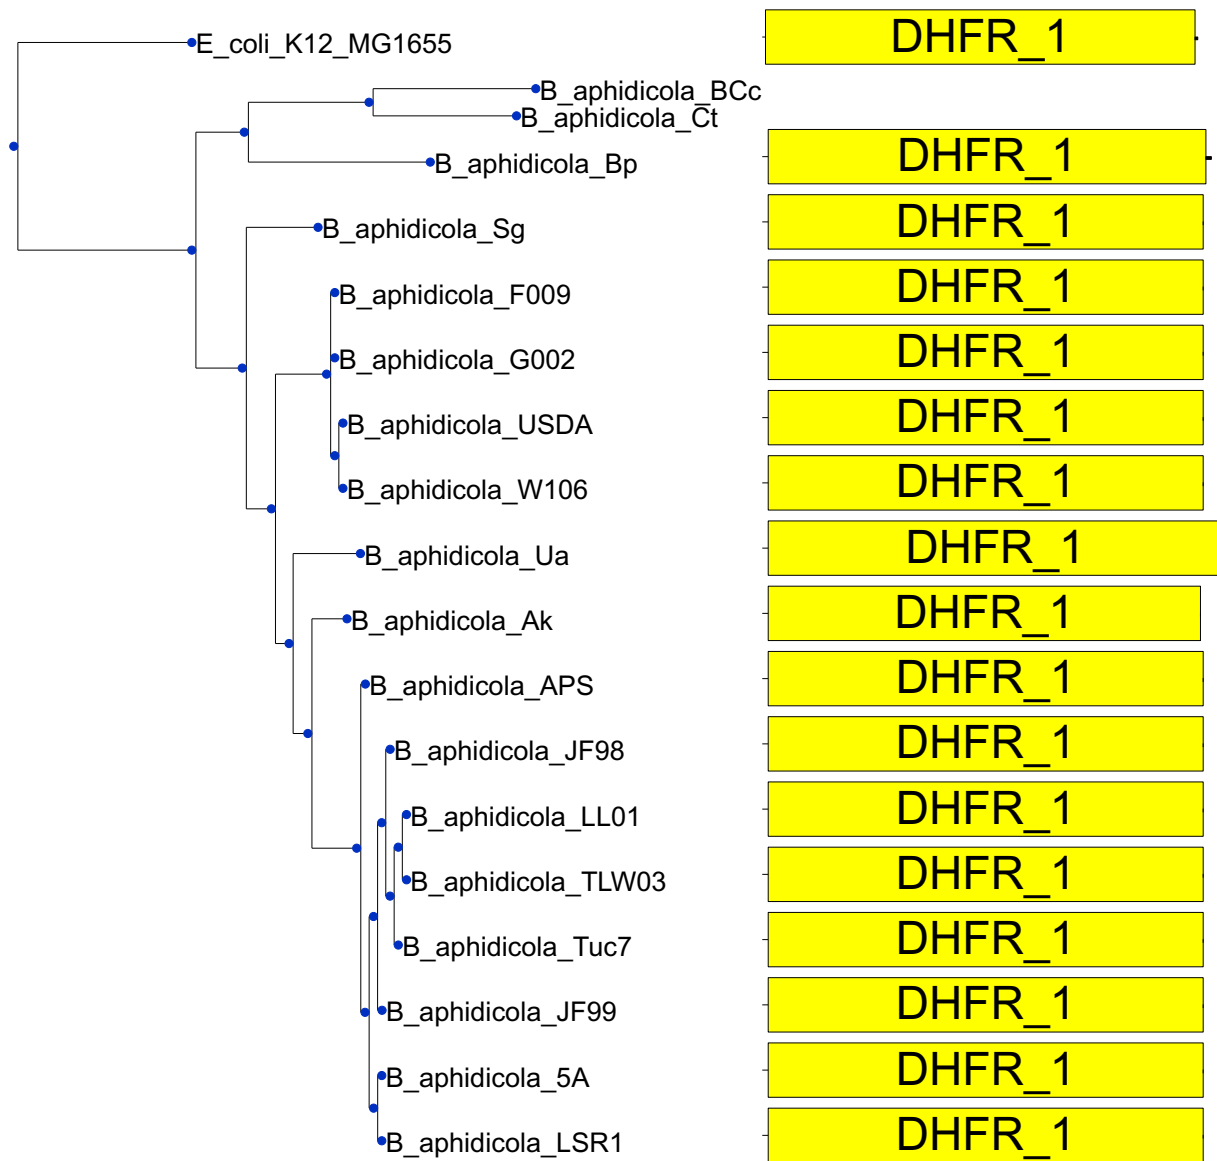

0.29

*folA*  
NP\_414590.1  
dihydrofolate reductase

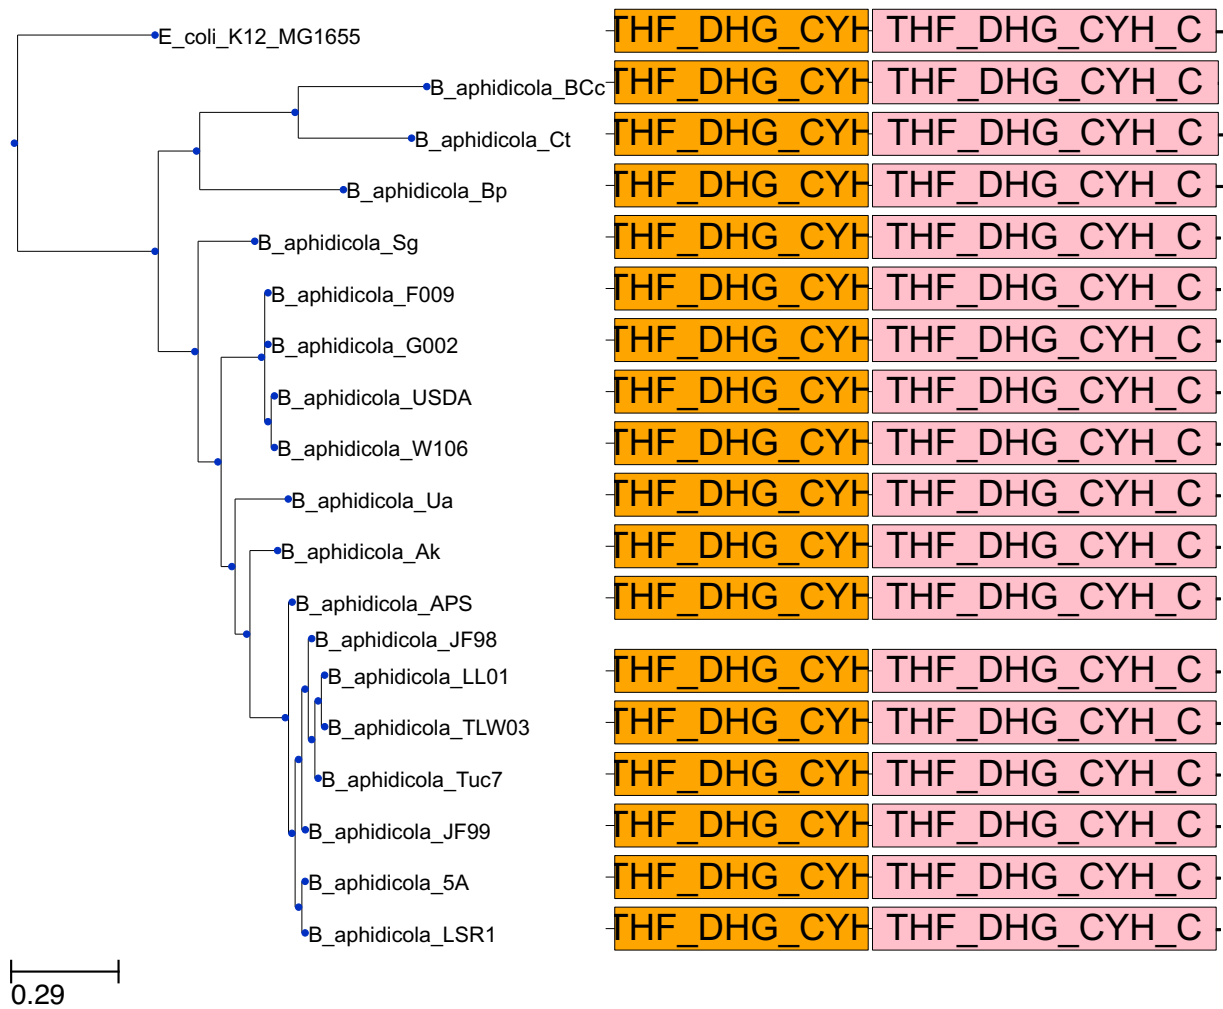

*fold*

NP\_415062.1

"bifunctional 5,10-methylene-tetrahydrofolate dehydrogenase/ 5,10-methylene-tetrahydrofolate cyclohydrolase"

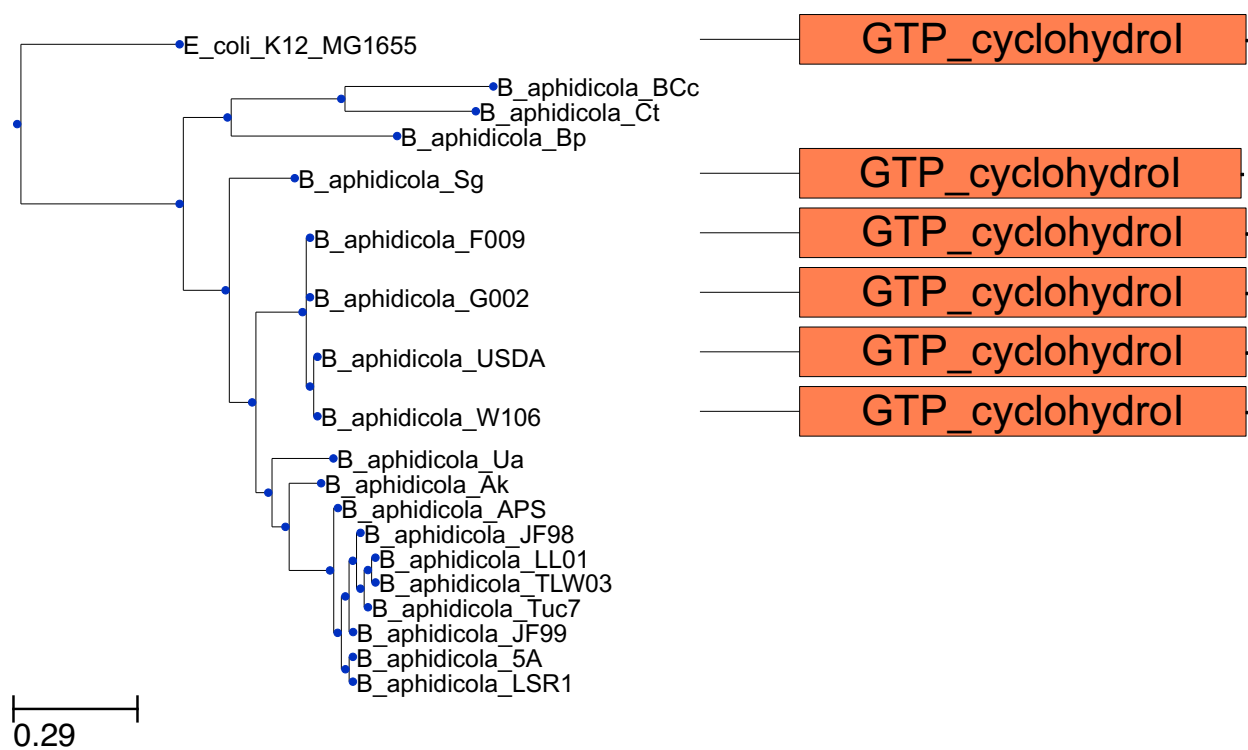

*foIE*  
 NP\_416658.1  
 GTP cyclohydrolase I



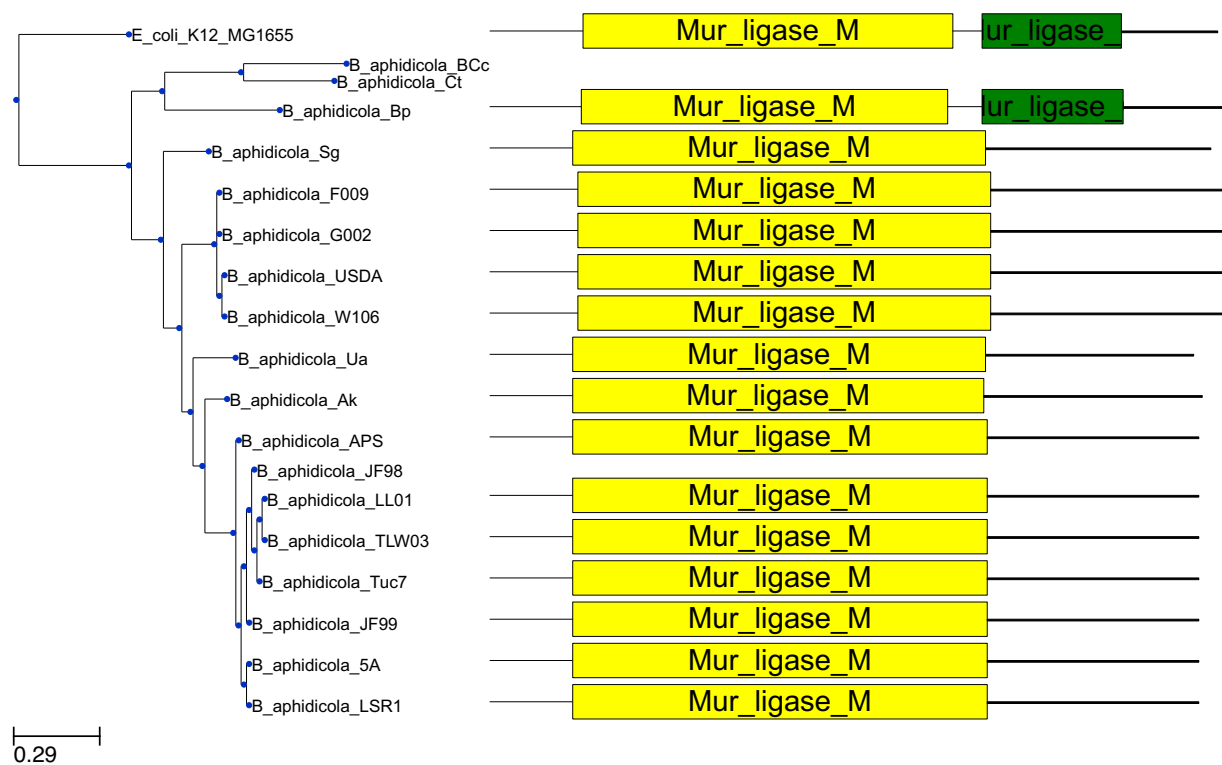

*folC*

NP\_416818.1

bifunctional folylpolyglutamate synthase/ dihydrofolate synthase

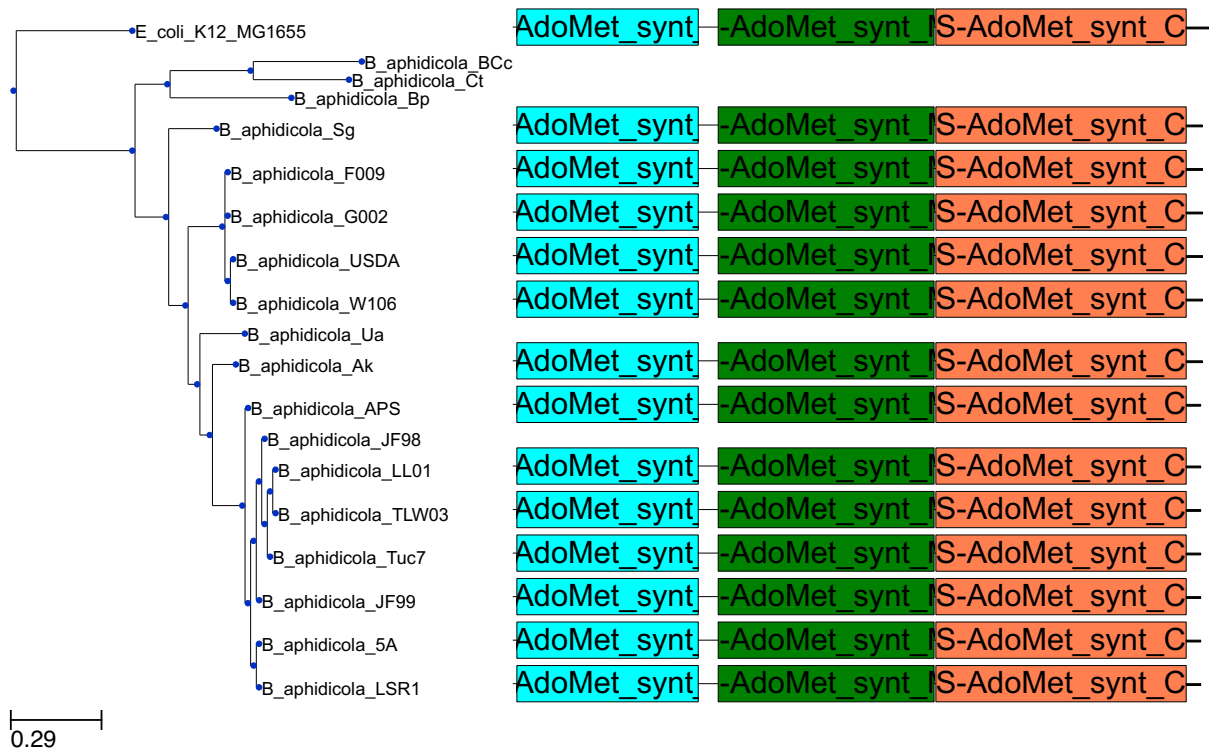

*metK*  
NP\_417417.1  
S-adenosylmethionine synthetase

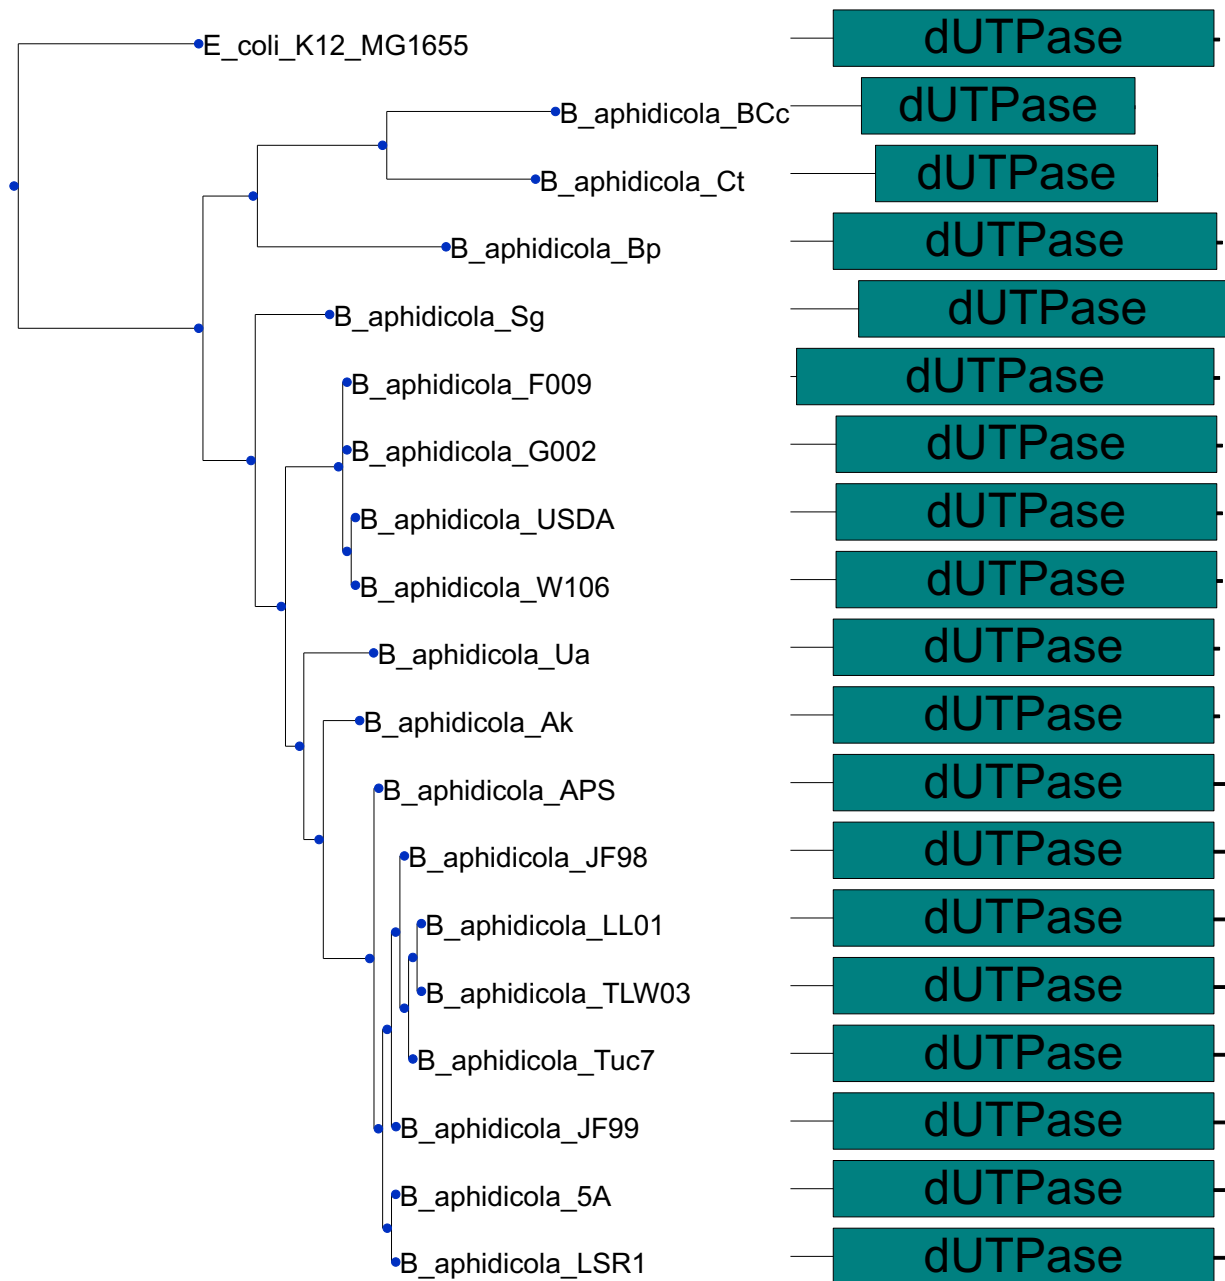

0.29

*dut*  
NP\_418097.1  
deoxyuridinetriphosphatase

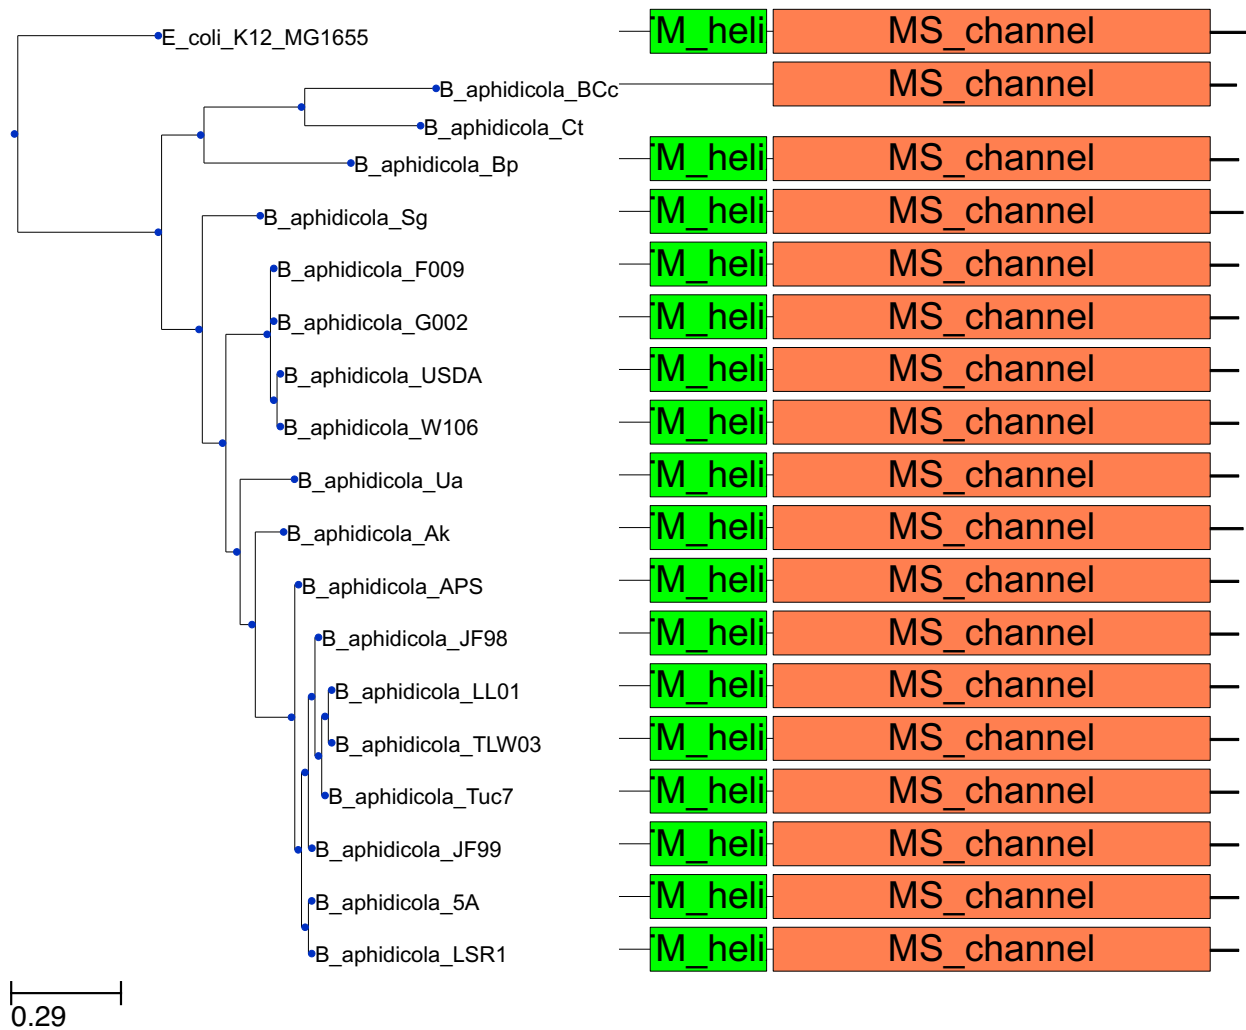

*mscS*  
NP\_417399.1  
"mechanosensitive channel protein, small conductance"

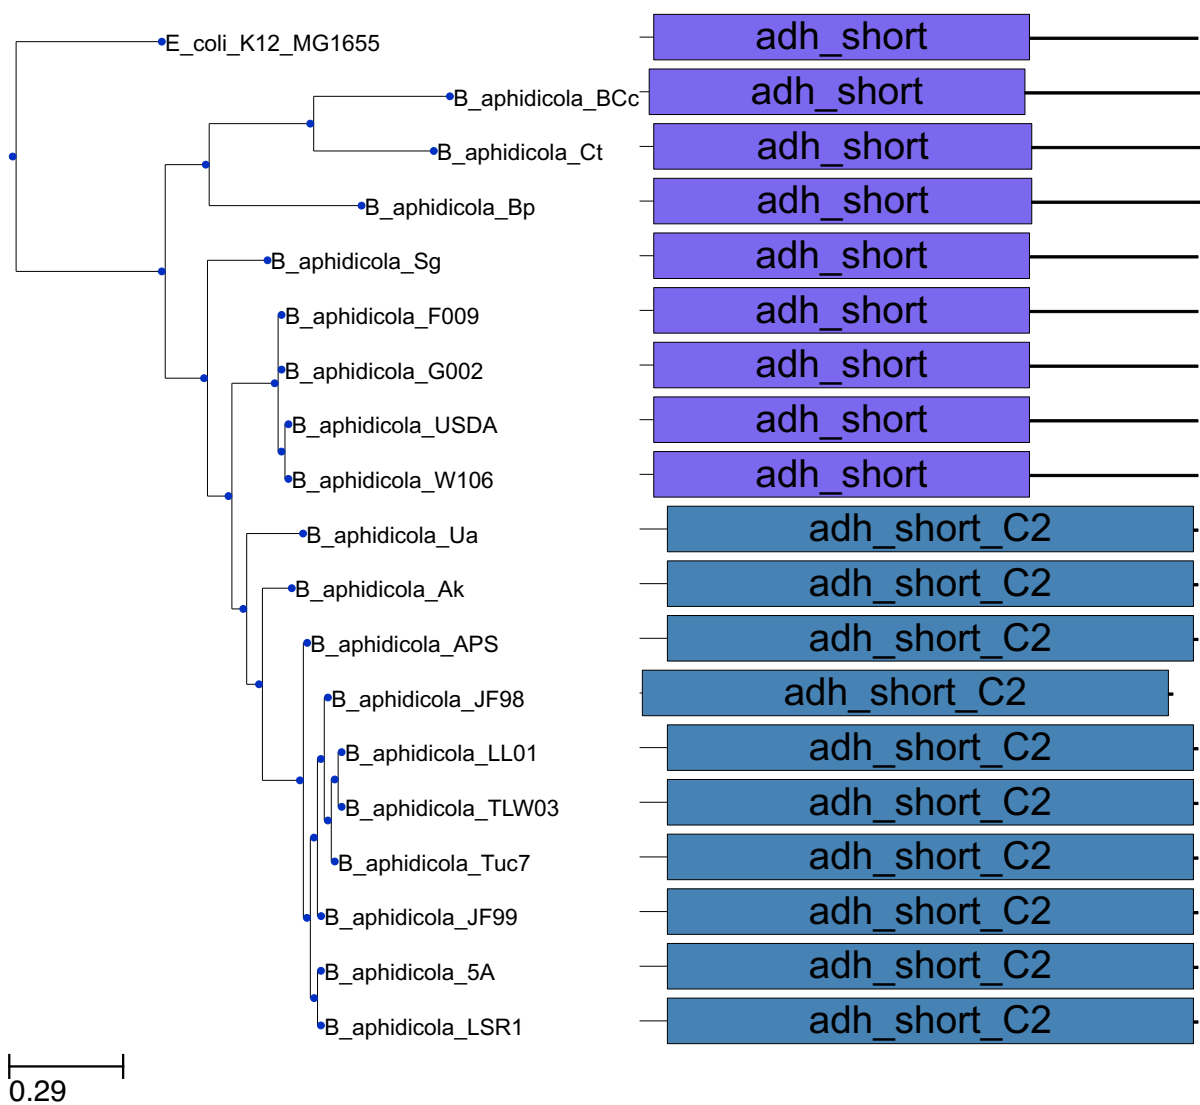

*fabG*  
NP\_415611.1  
3-oxoacyl-[acyl-carrier-protein] reductase

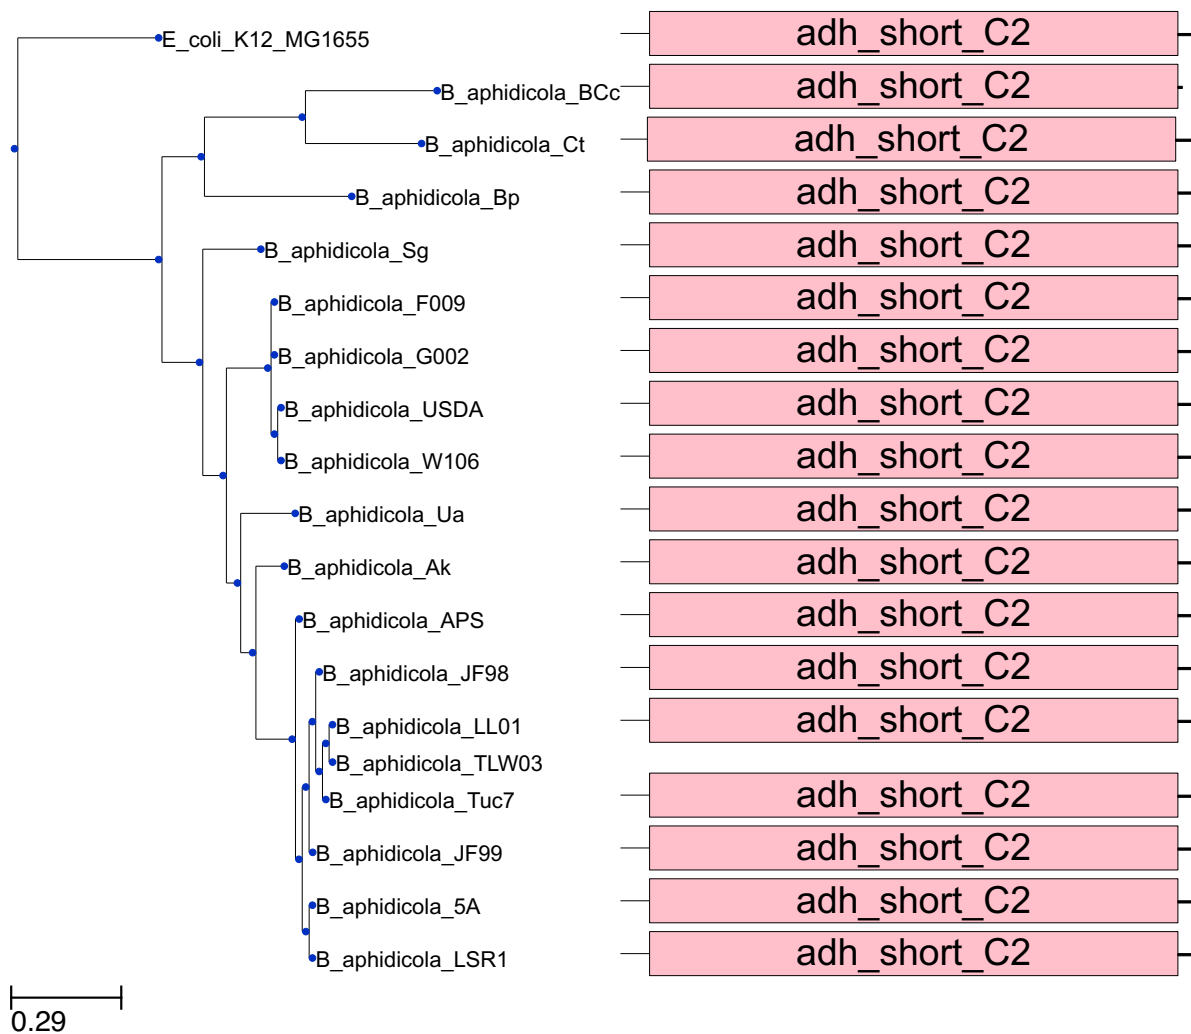

*fabI*

NP\_415804.1

"enoyl-[acyl-carrier-protein] reductase, NADH-dependent"

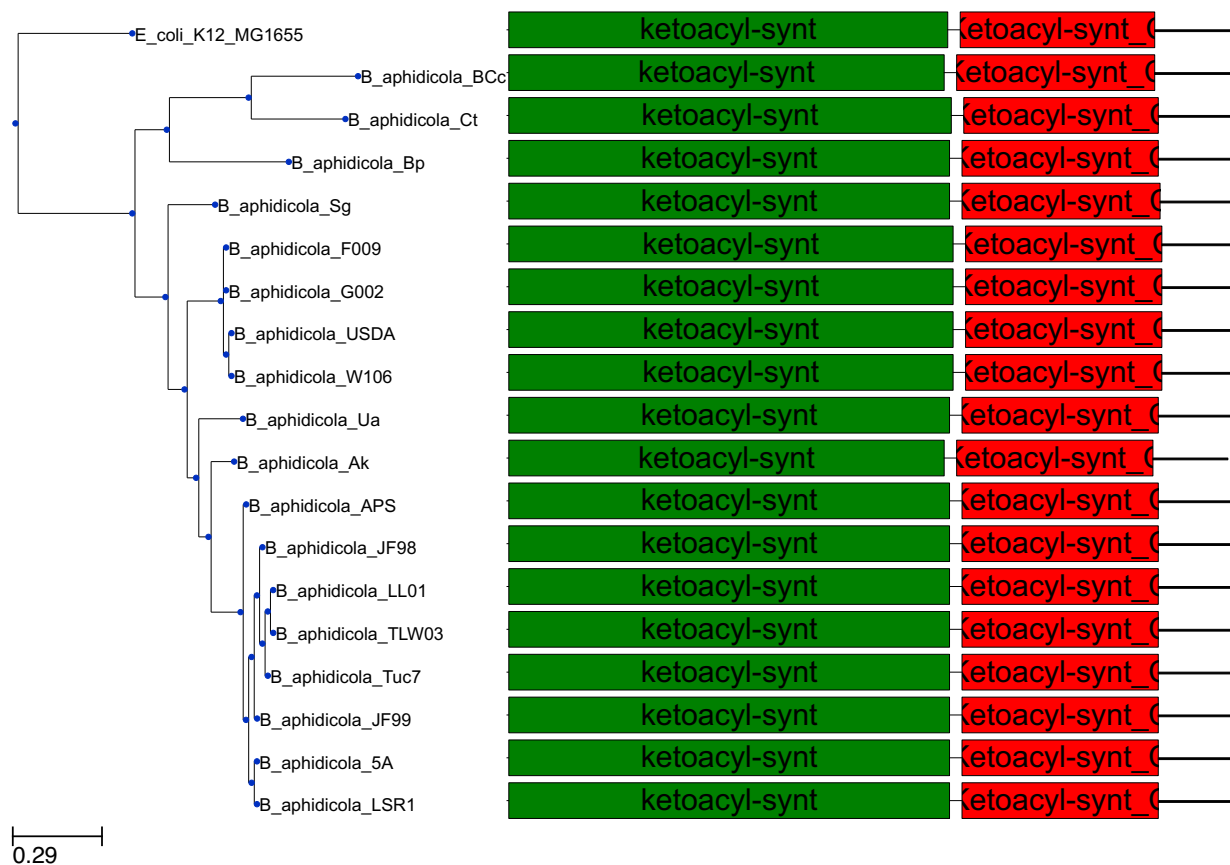

*fabB*

NP\_416826.1

3-oxoacyl-[acyl-carrier-protein] synthase I

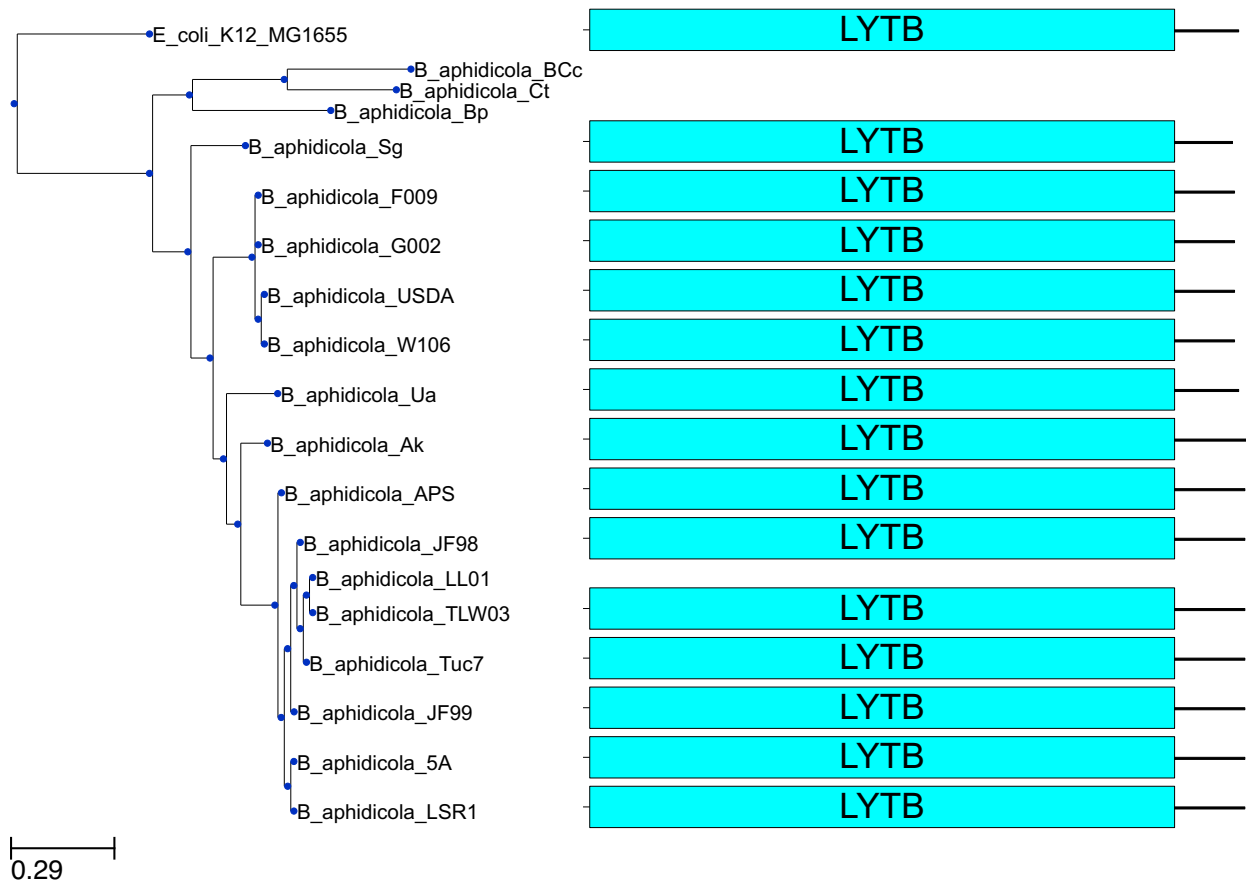

*ispH*

NP\_414570.1

"4-hydroxy-3-methylbut-2-enyl diphosphate reductase, 4Fe-4S protein"



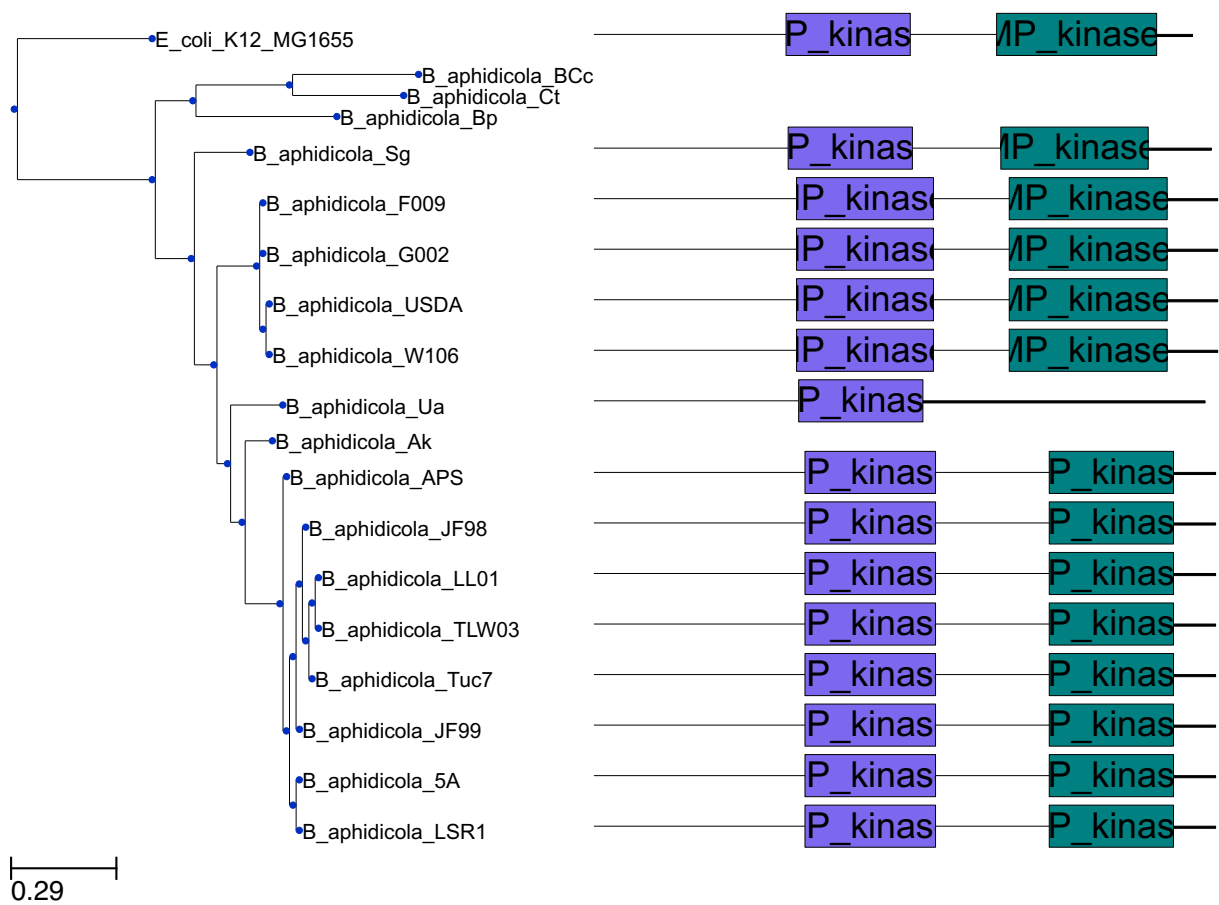

*ispE*

NP\_415726.1

4-diphosphocytidyl-2-C-methylerythritol kinase

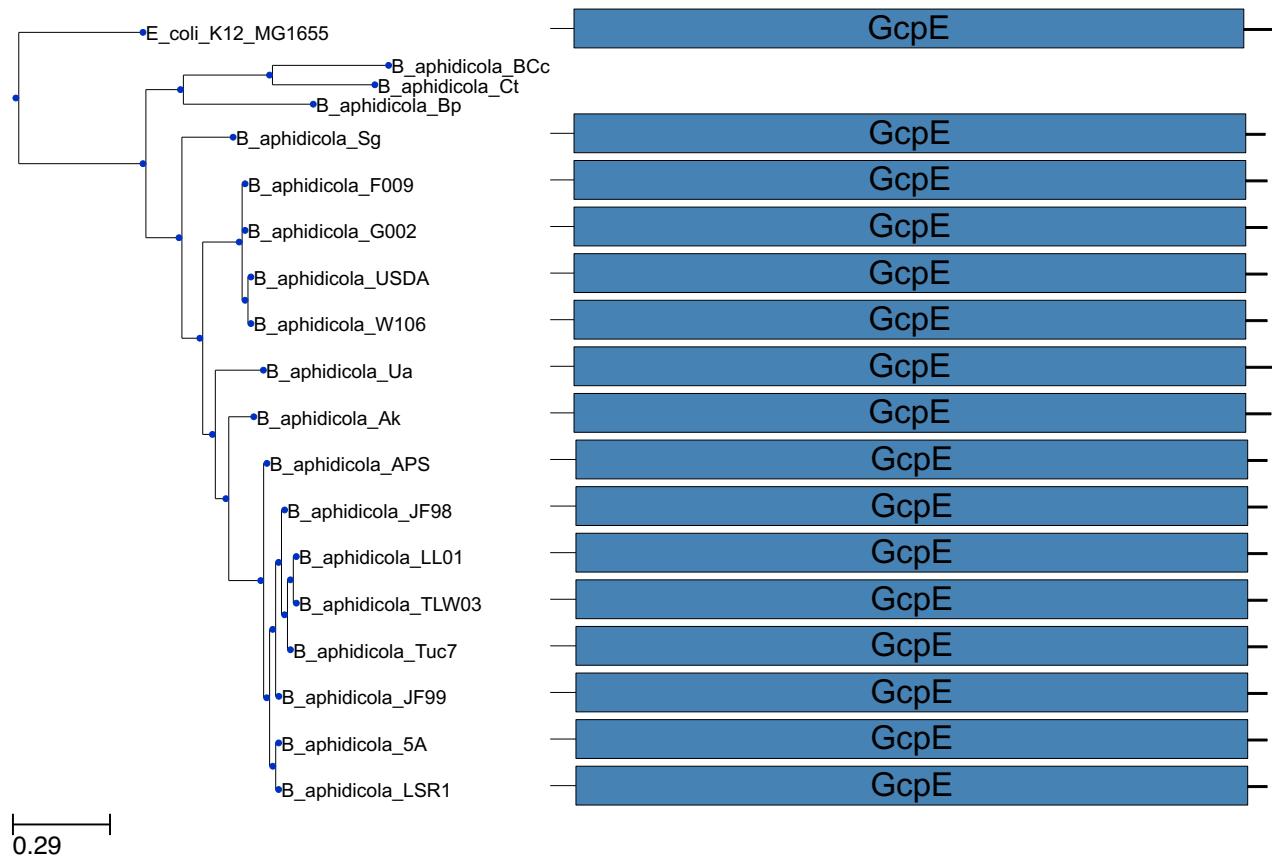

*ispG*  
NP\_417010.1  
1-hydroxy-2-methyl-2-(E)-butenyl 4-diphosphate synthase

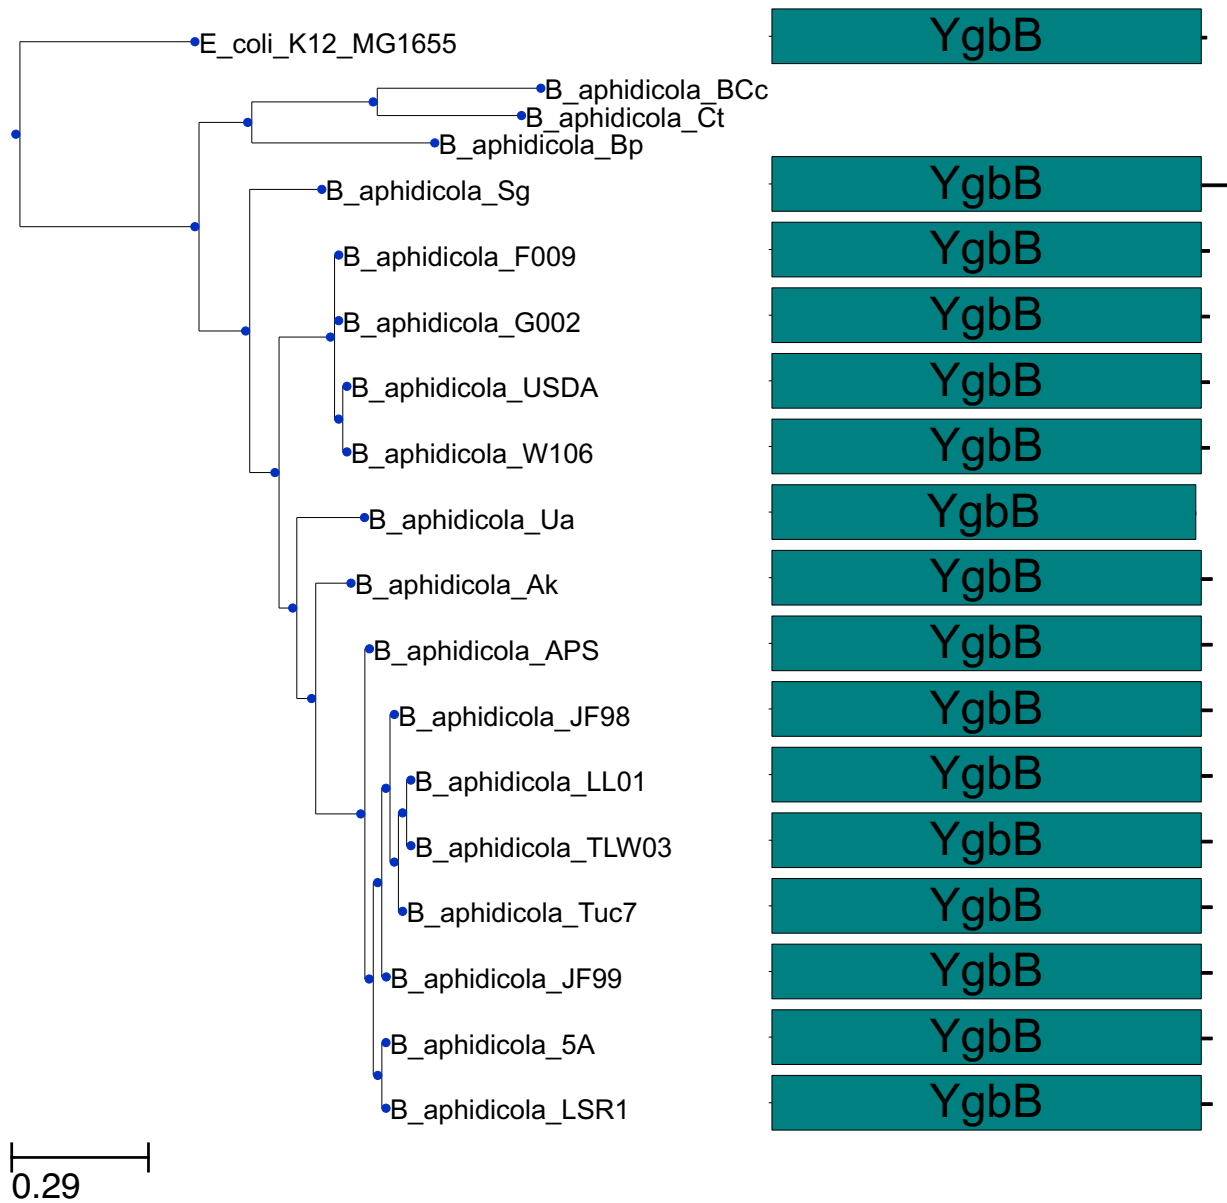

*ispF*  
NP\_417226.1  
"2C-methyl-D-erythritol 2,4-cyclodiphosphate synthase"

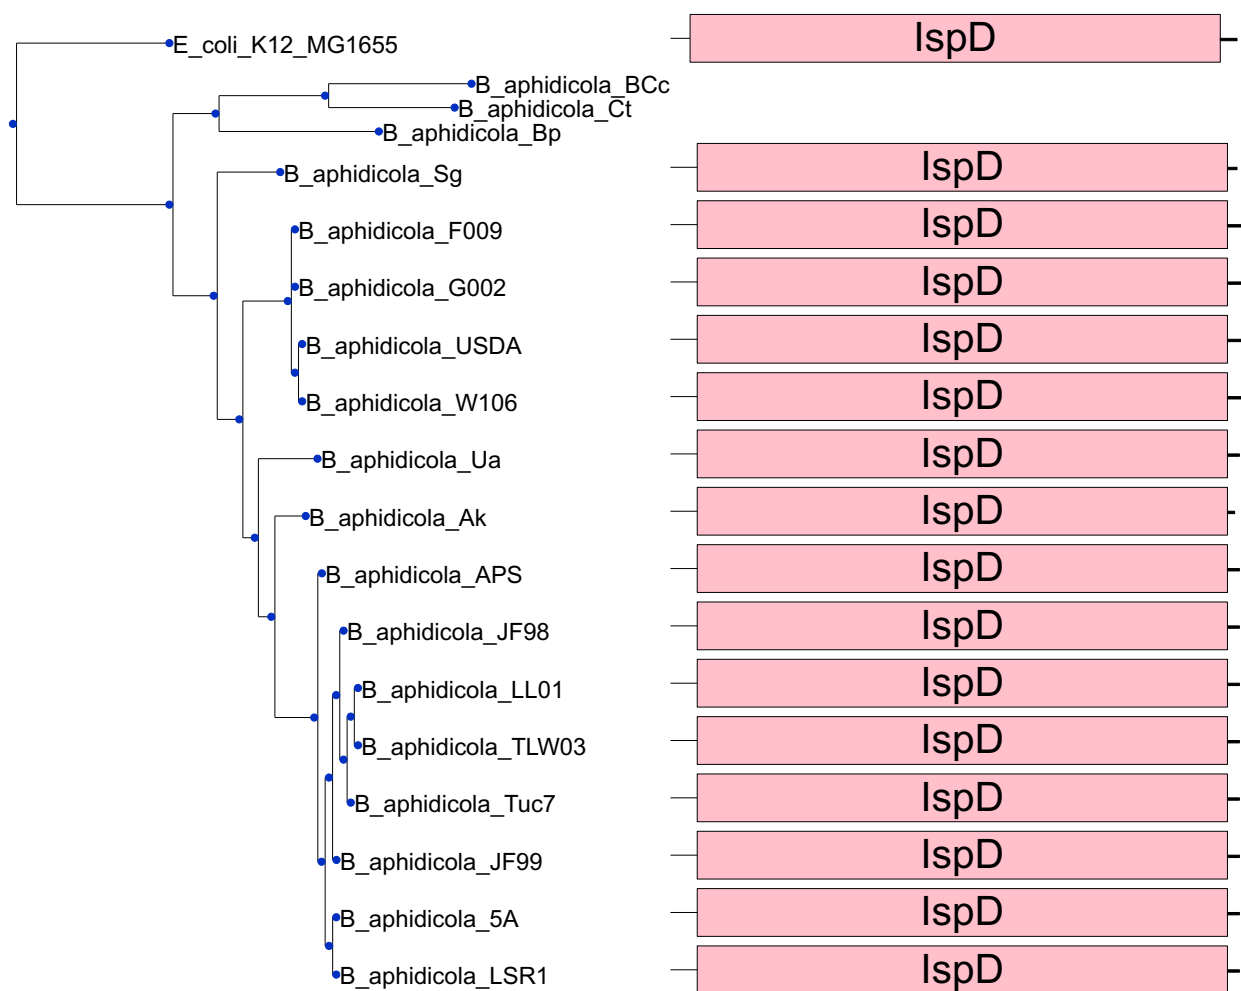

0.29

*ispD*  
NP\_417227.1  
4-diphosphocytidyl-2C-methyl-D-erythritol synthase

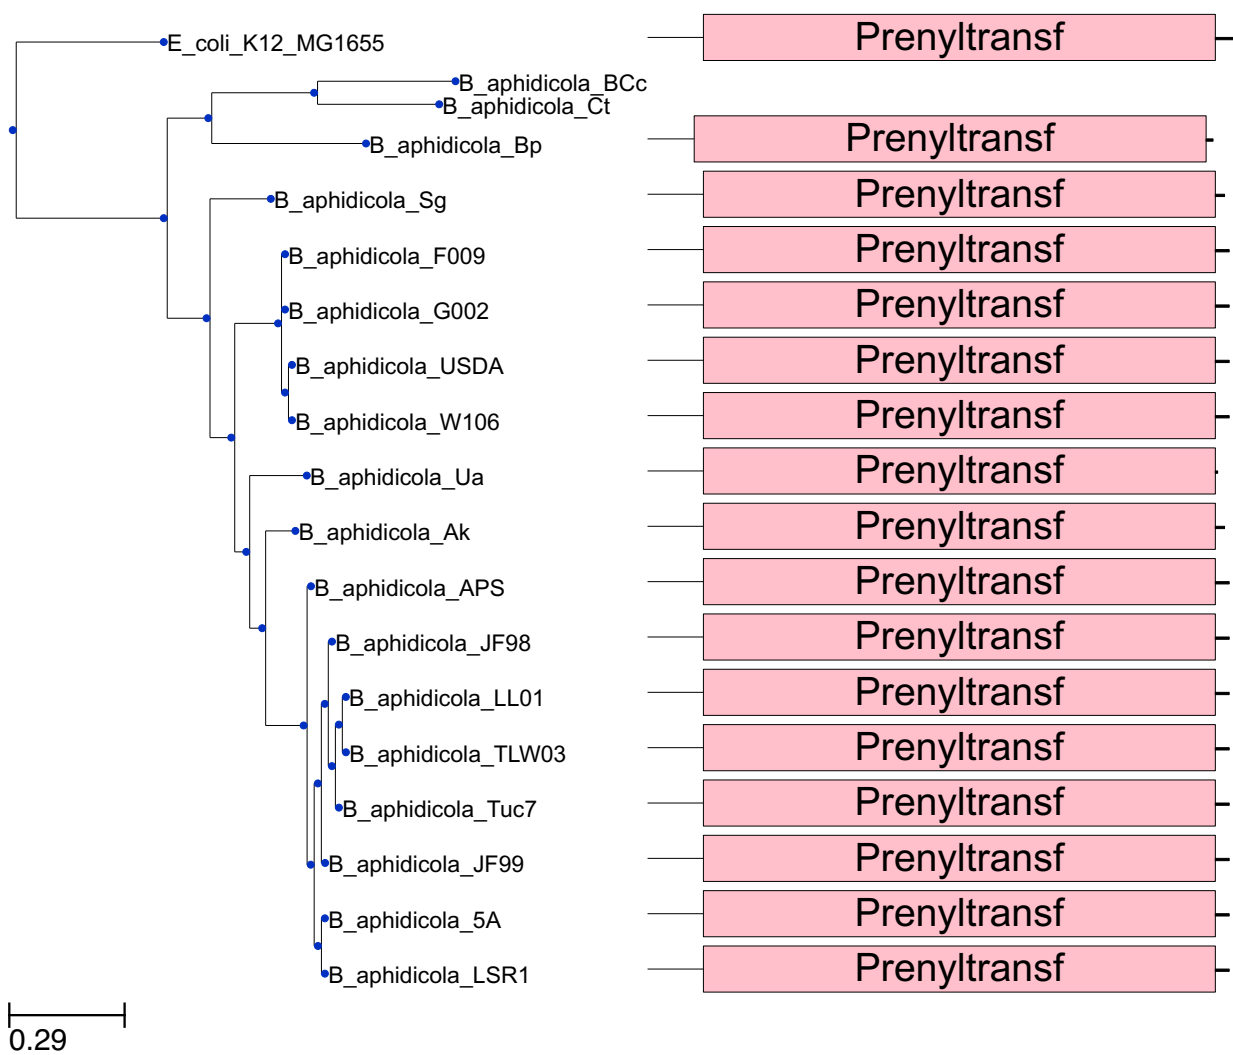

*ispU*  
NP\_414716.1  
undecaprenyl pyrophosphate synthase

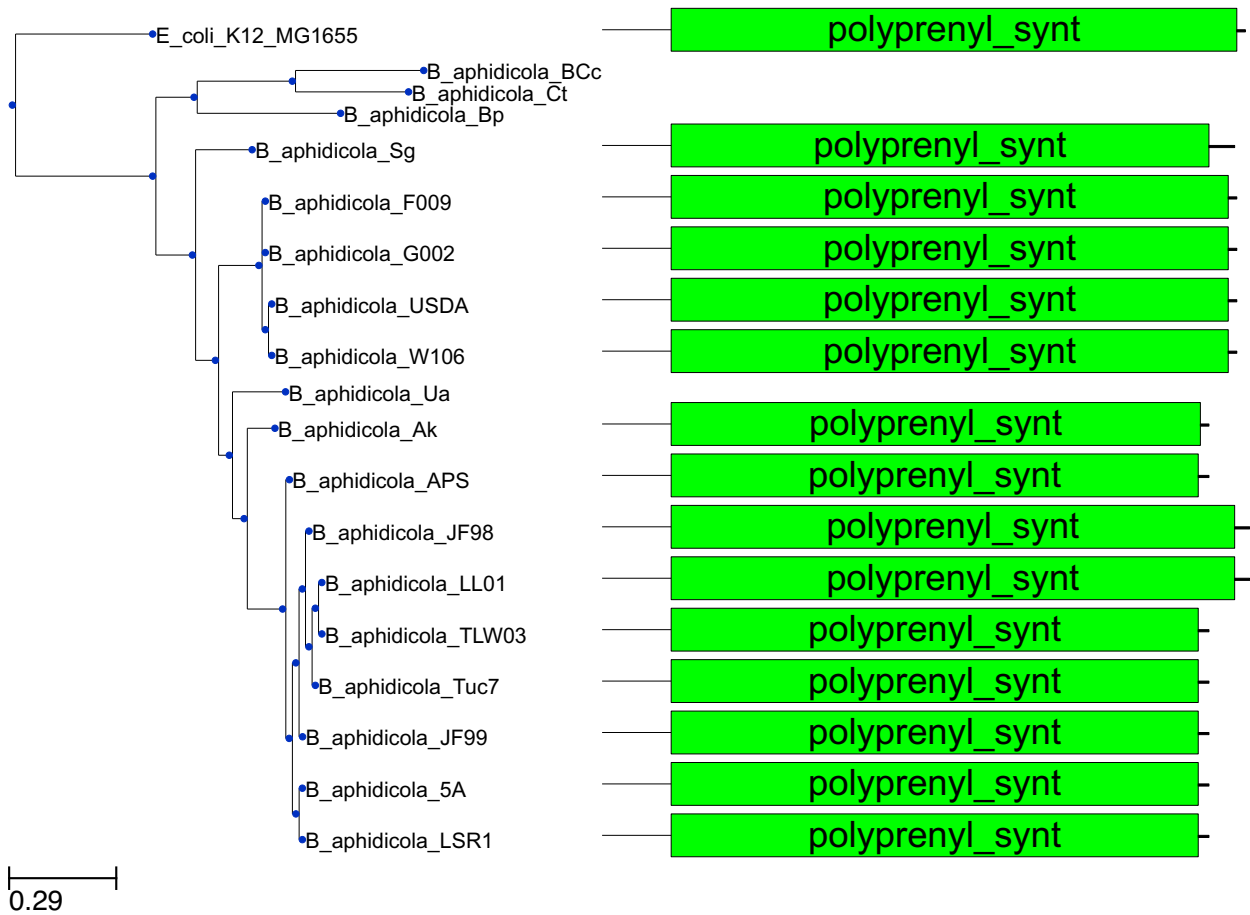

*ispA*  
NP\_414955.1  
geranyltranstransferase

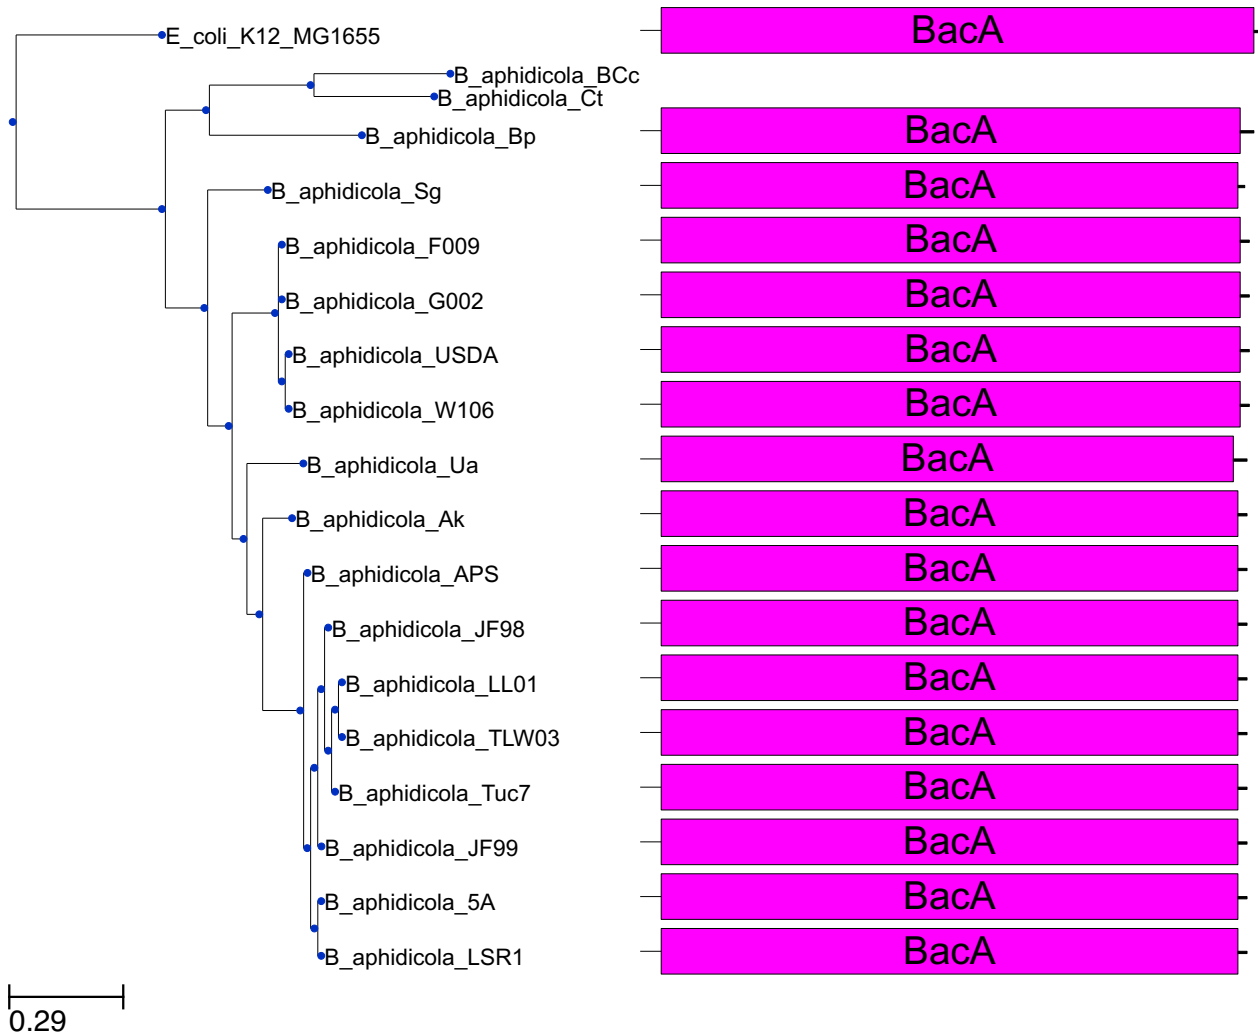

*bacA*  
NP\_417529.1  
undecaprenyl pyrophosphate phosphatase

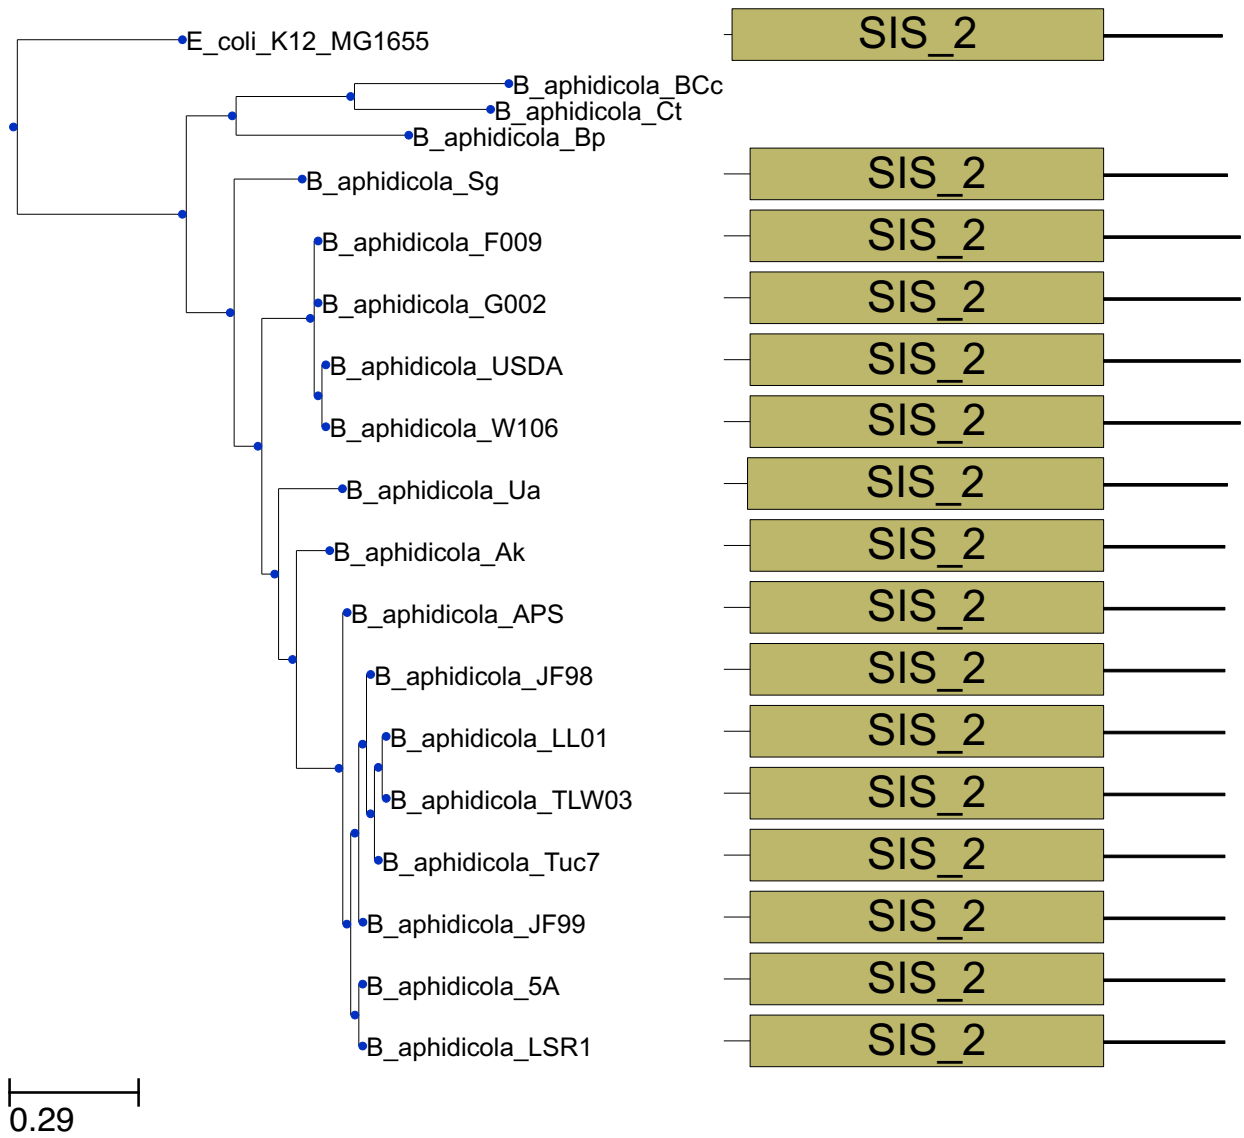

*lpcA*  
NP\_414757.1  
D-sedoheptulose 7-phosphate isomerase



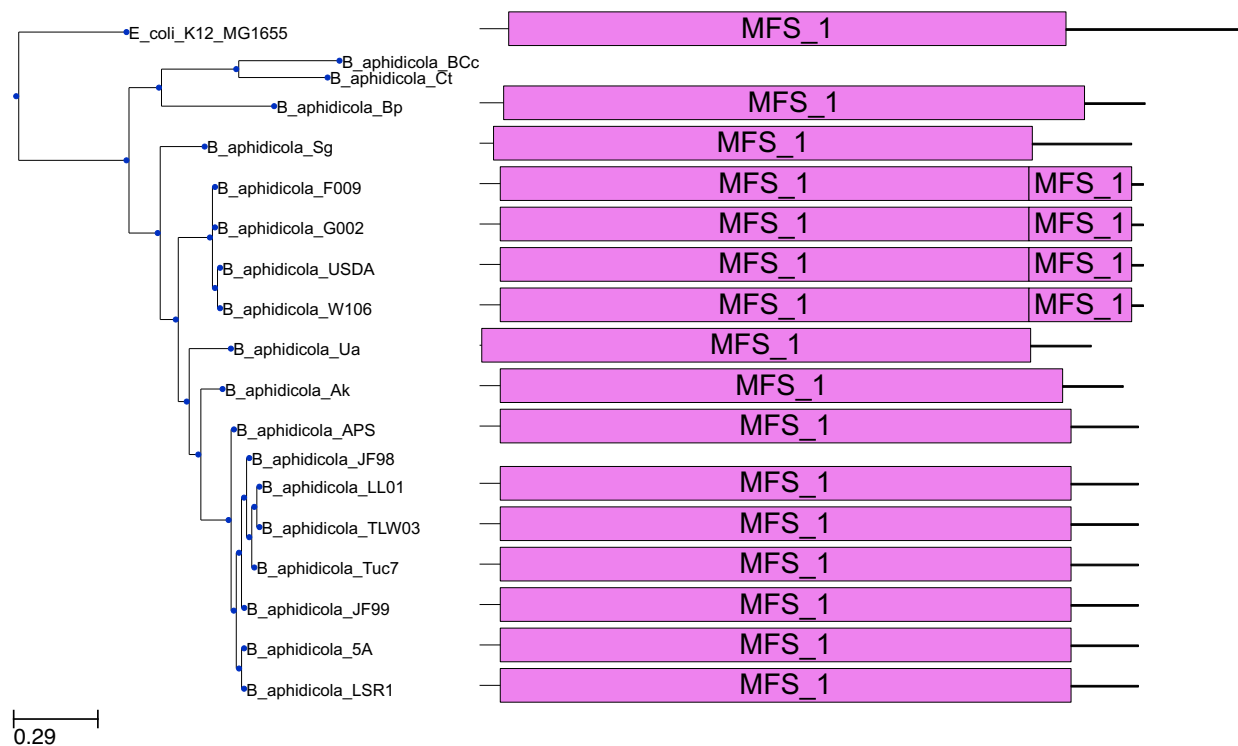

*yajR*  
NP\_414961.4  
putative transporter

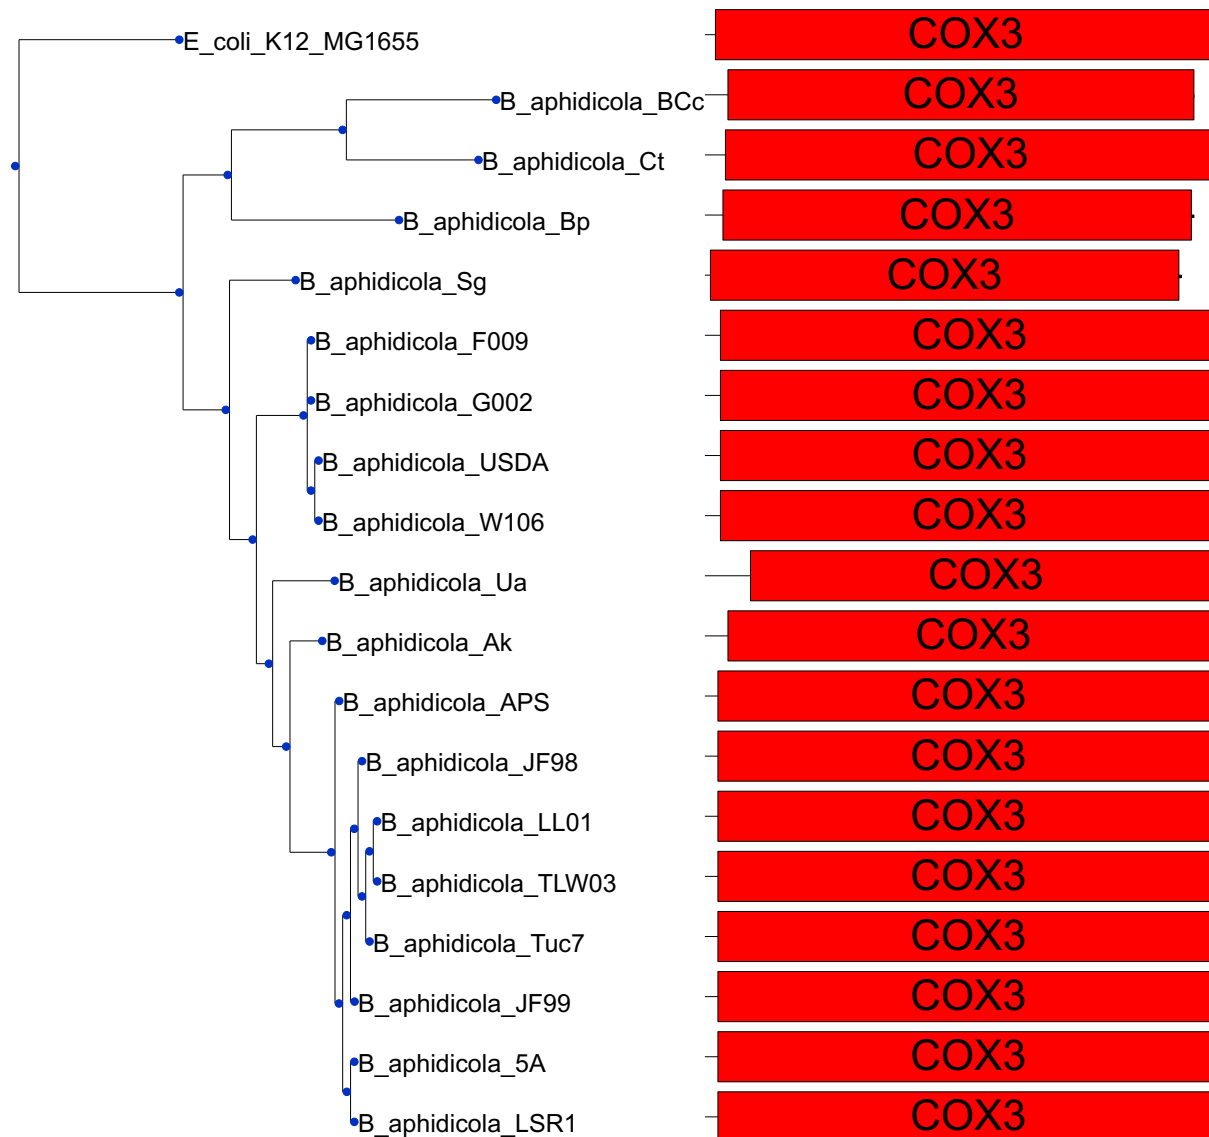

0.29

*cyoC*  
NP\_414964.1  
cytochrome o ubiquinol oxidase subunit III

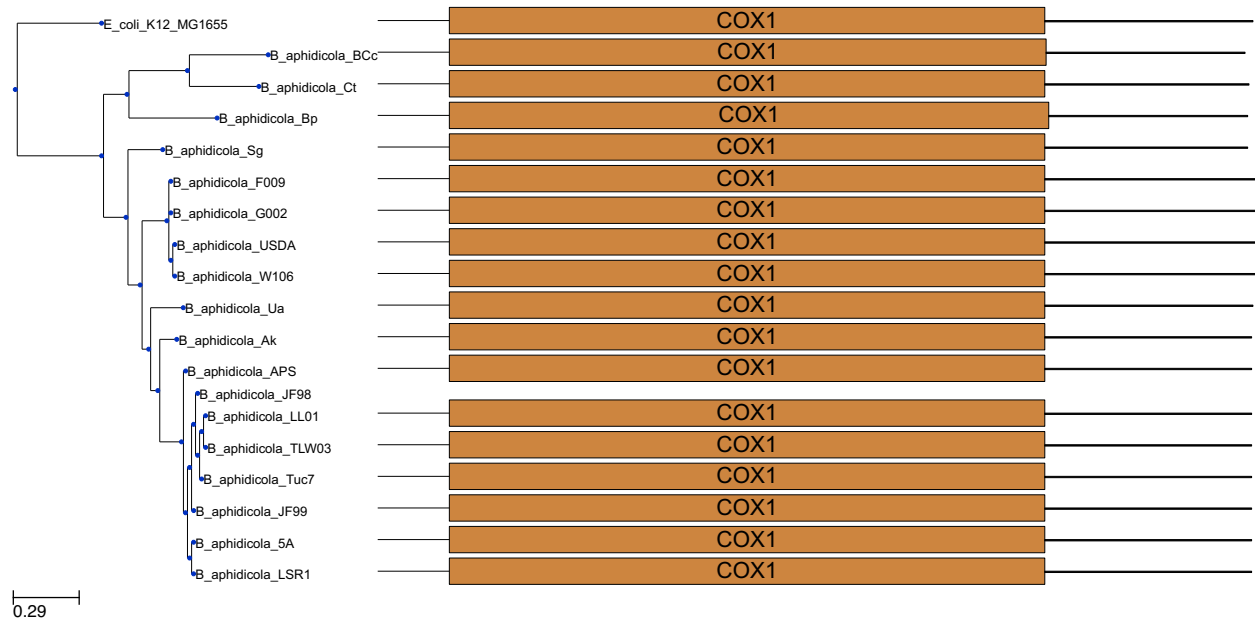

*cyoB*

NP\_414965.1

cytochrome o ubiquinol oxidase subunit I

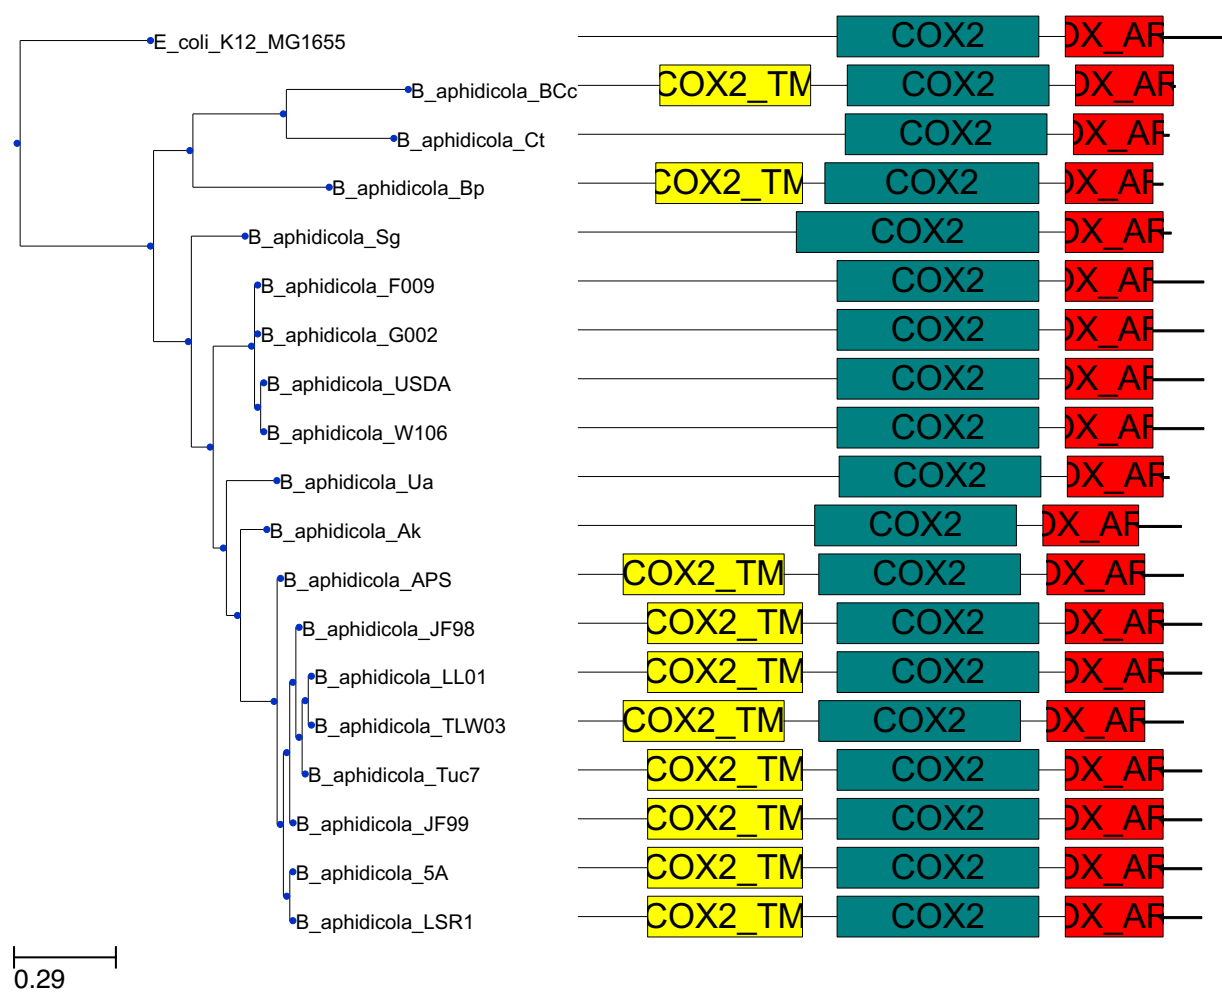

*cyoA*  
NP\_414966.1  
cytochrome o ubiquinol oxidase subunit II

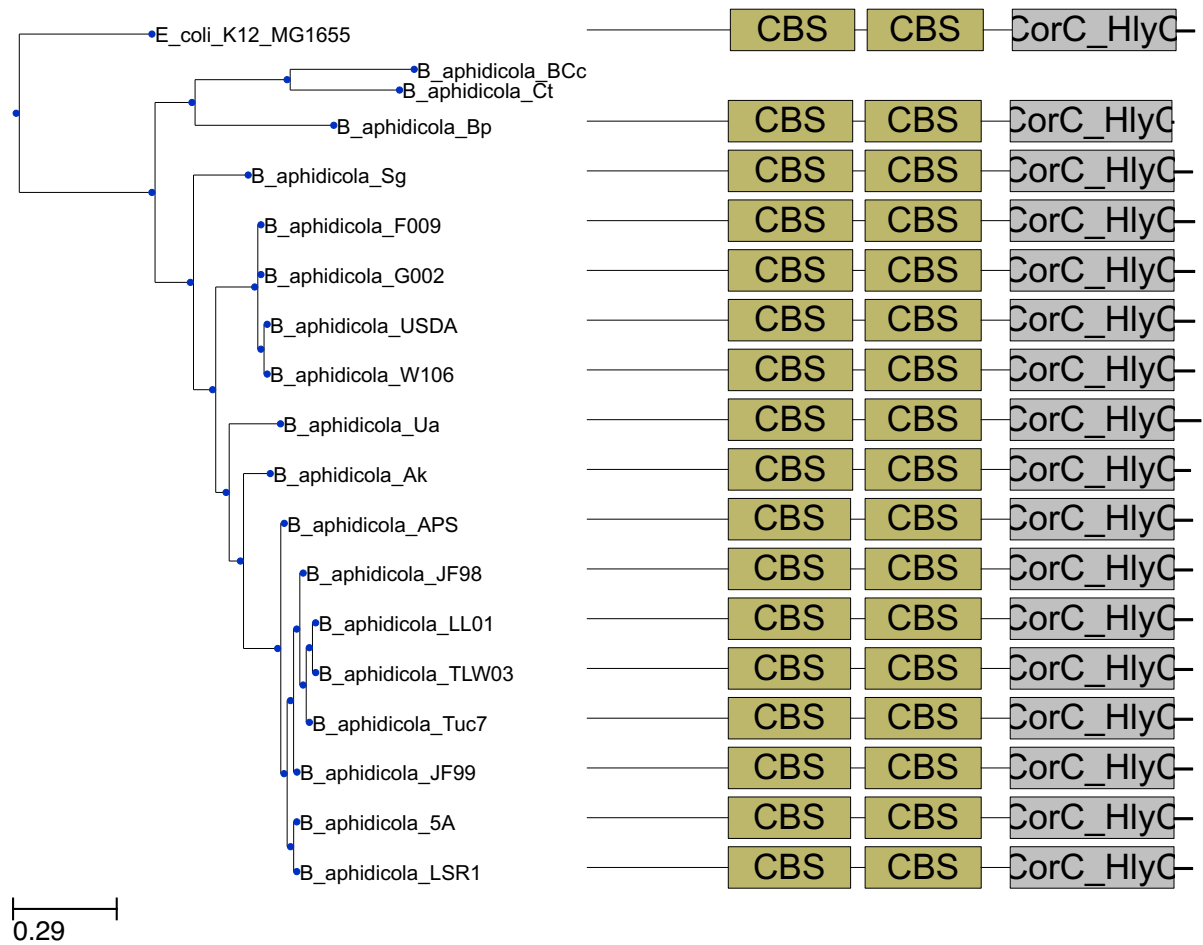

*ybeX*  
NP\_415191.1  
putative ion transport

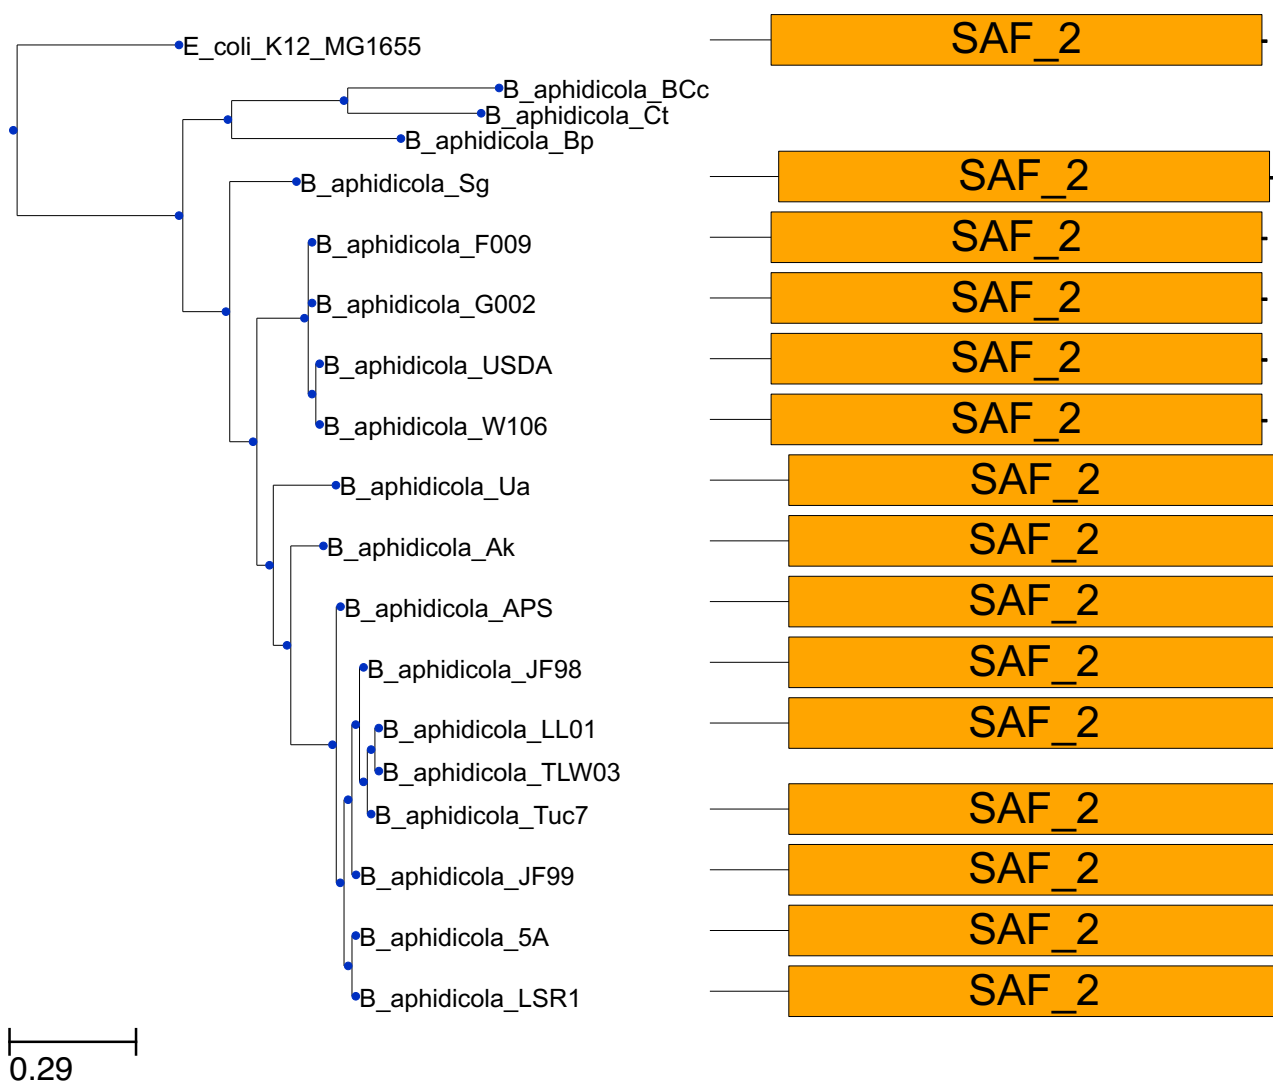

*flgA*  
NP\_415590.1  
assembly protein for flagellar basal-body periplasmic P ring

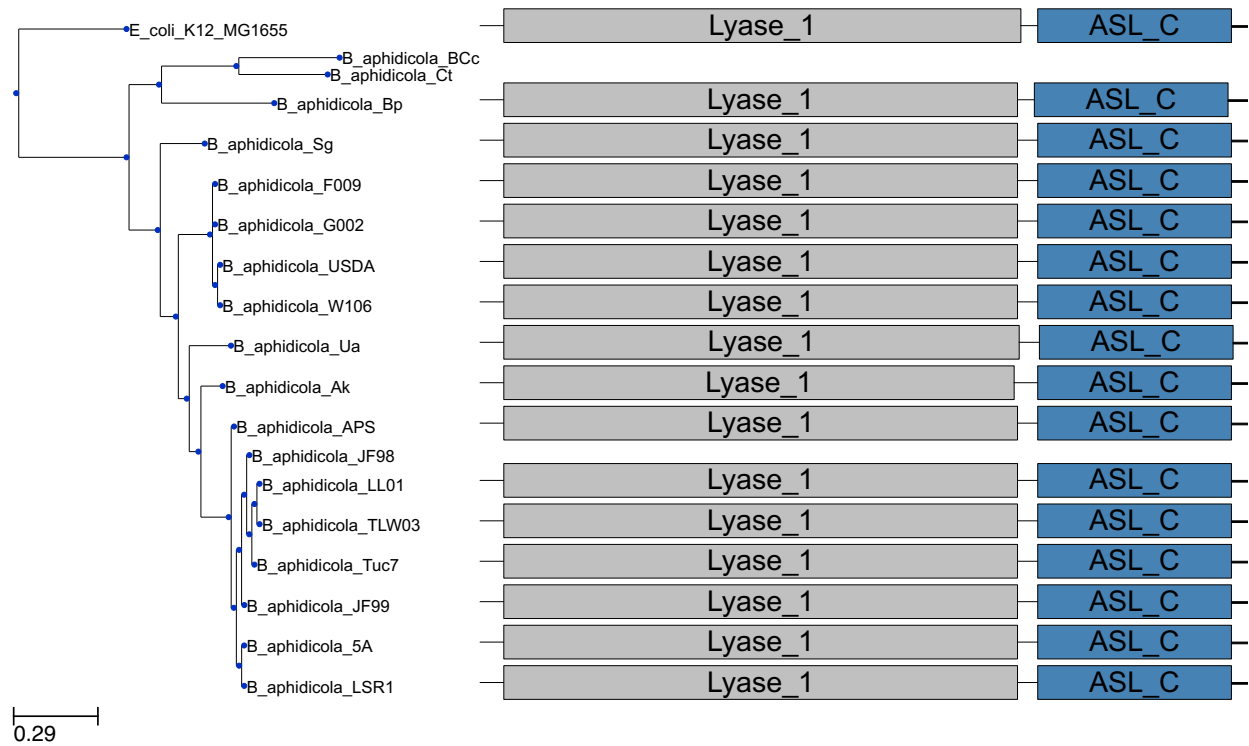

*purB*  
NP\_415649.1  
adenylosuccinate lyase

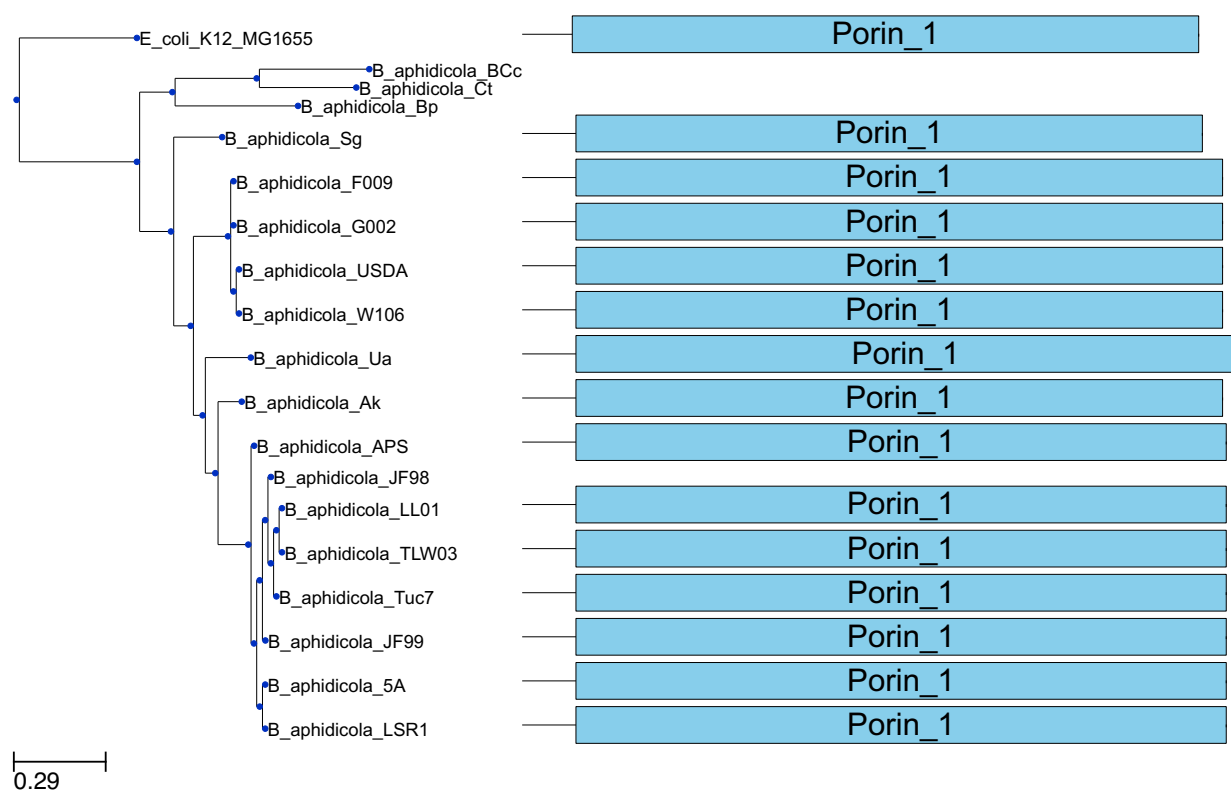

*ompN*

NP\_415895.1

"outer membrane pore protein N, non-specific"



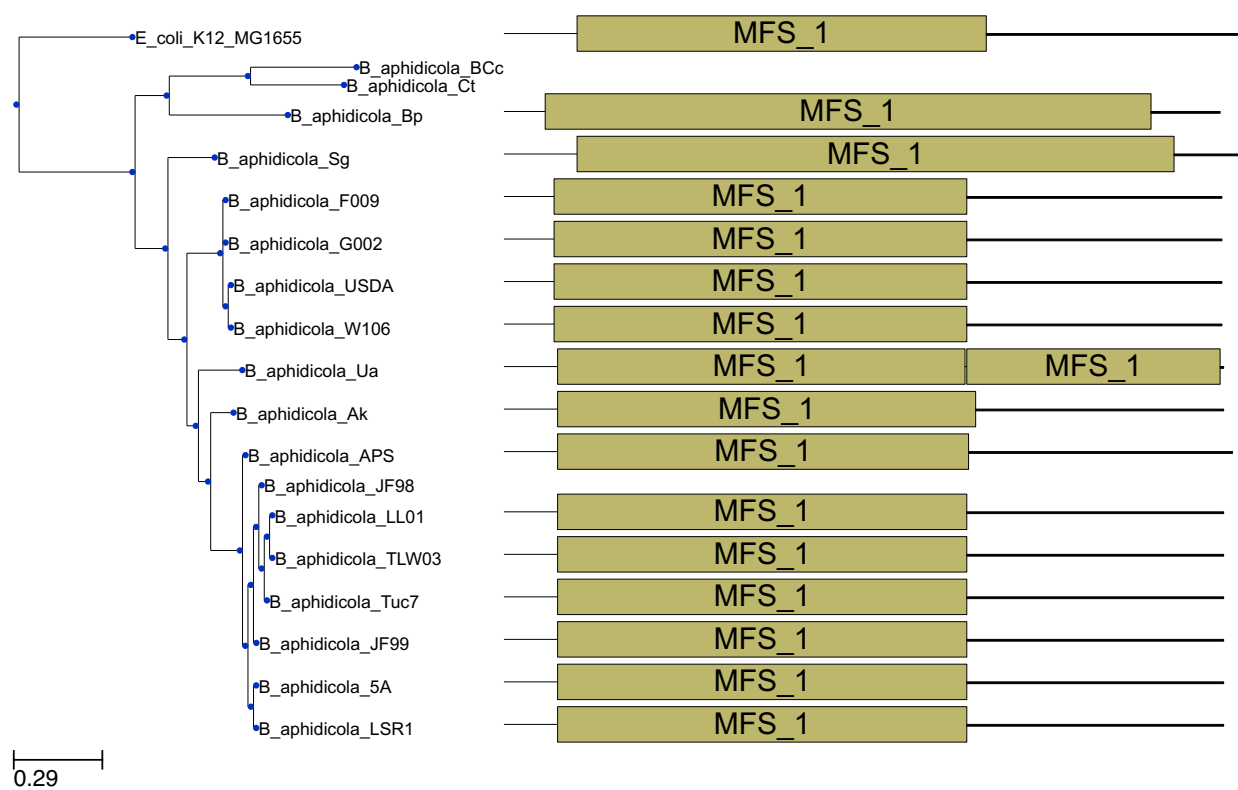

*ynfM*

NP\_416113.1

putative arabinose efflux transporter

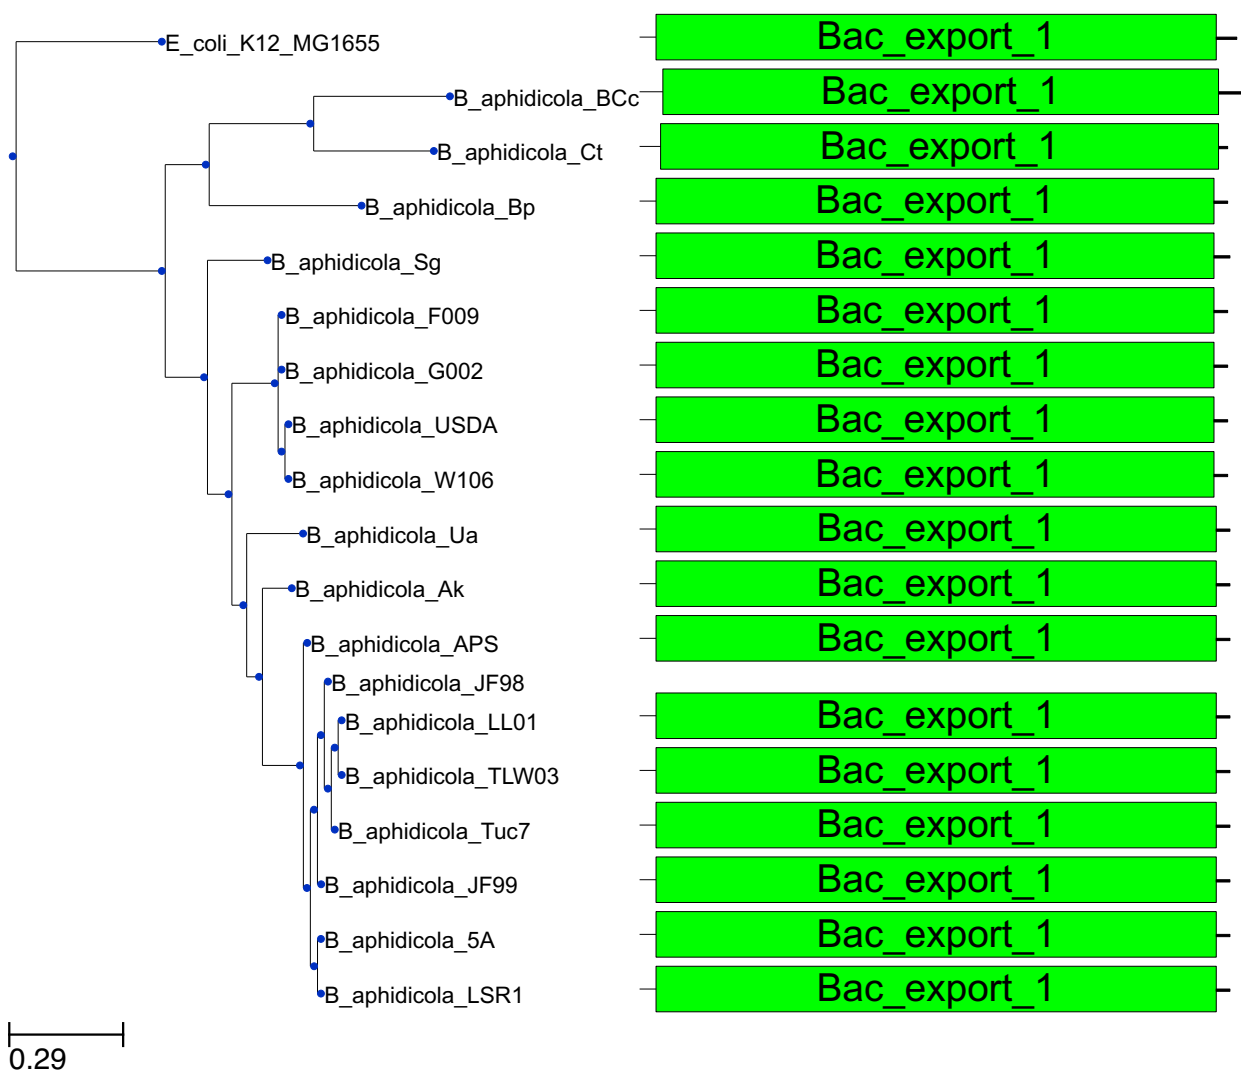

*fliR*  
NP\_416460.1  
flagellar export pore protein

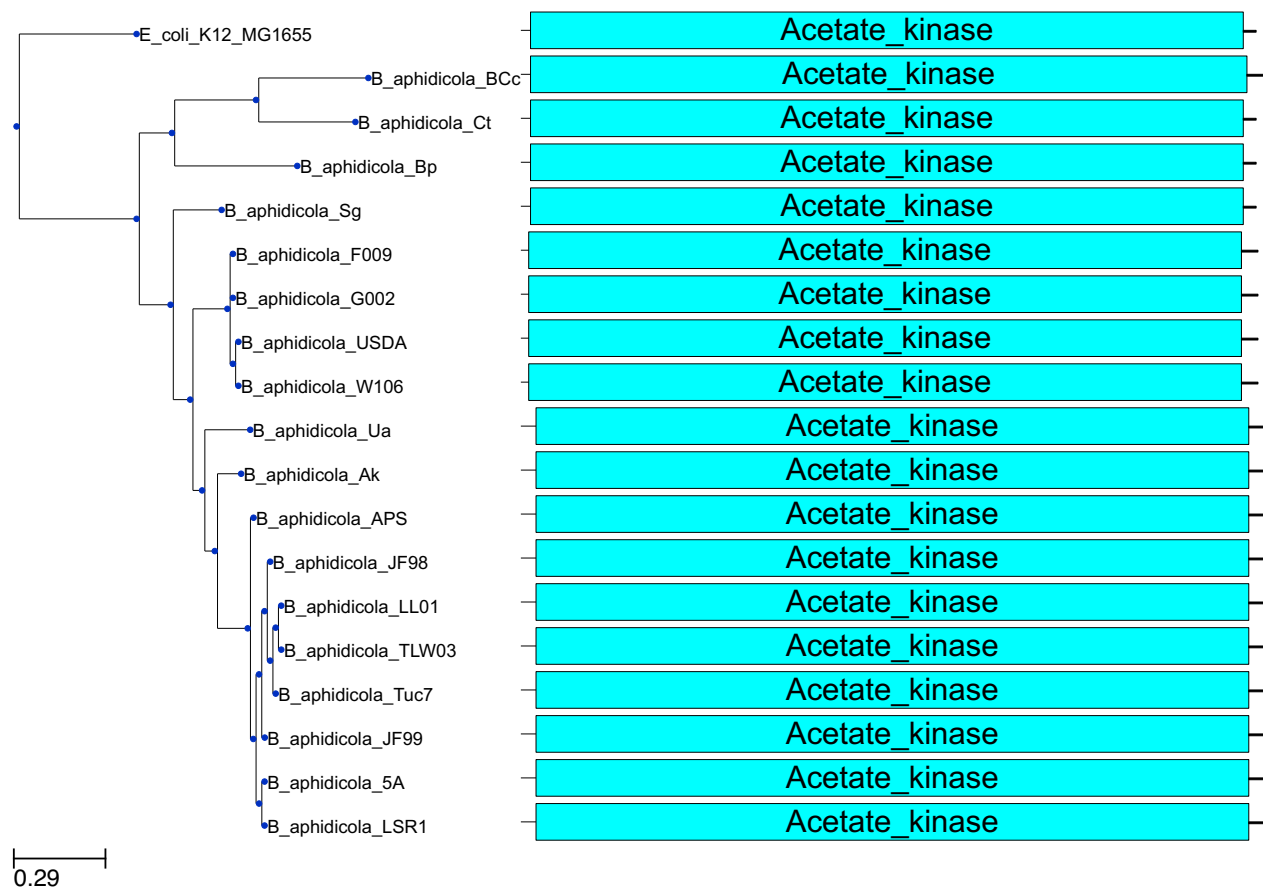

*ackA*  
 NP\_416799.1  
 acetate kinase A and propionate kinase 2

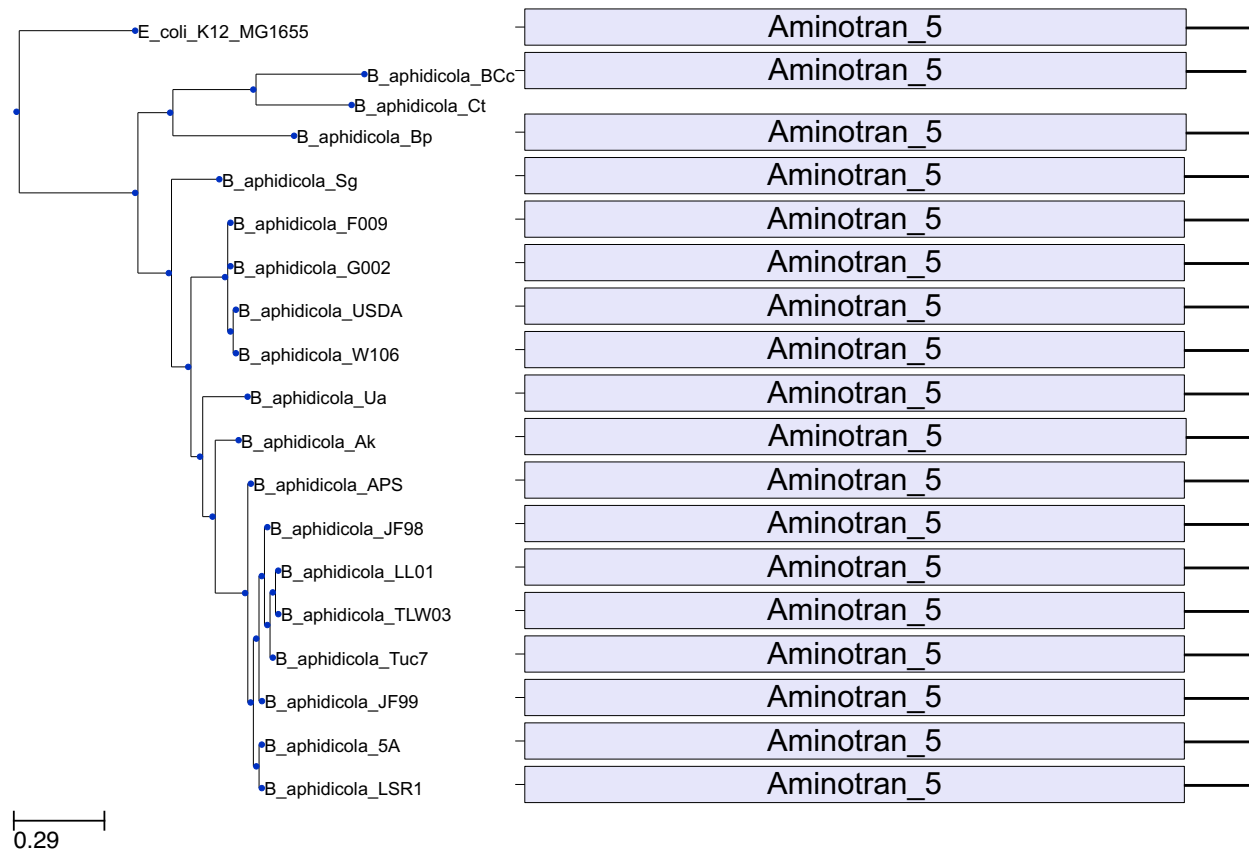

*iscS*

YP\_026169.1

"cysteine desulfurase (tRNA sulfurtransferase), PLP-dependent"

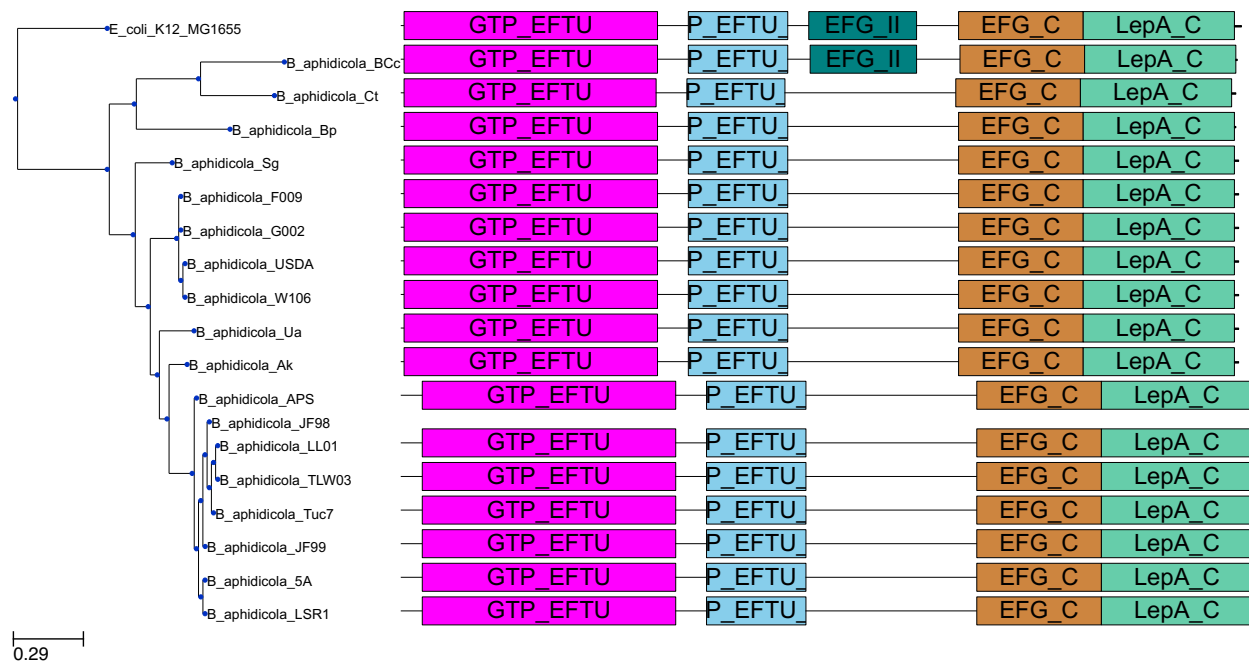

*lepA*

NP\_417064.1

"back-translocating elongation factor EF4, GTPase"

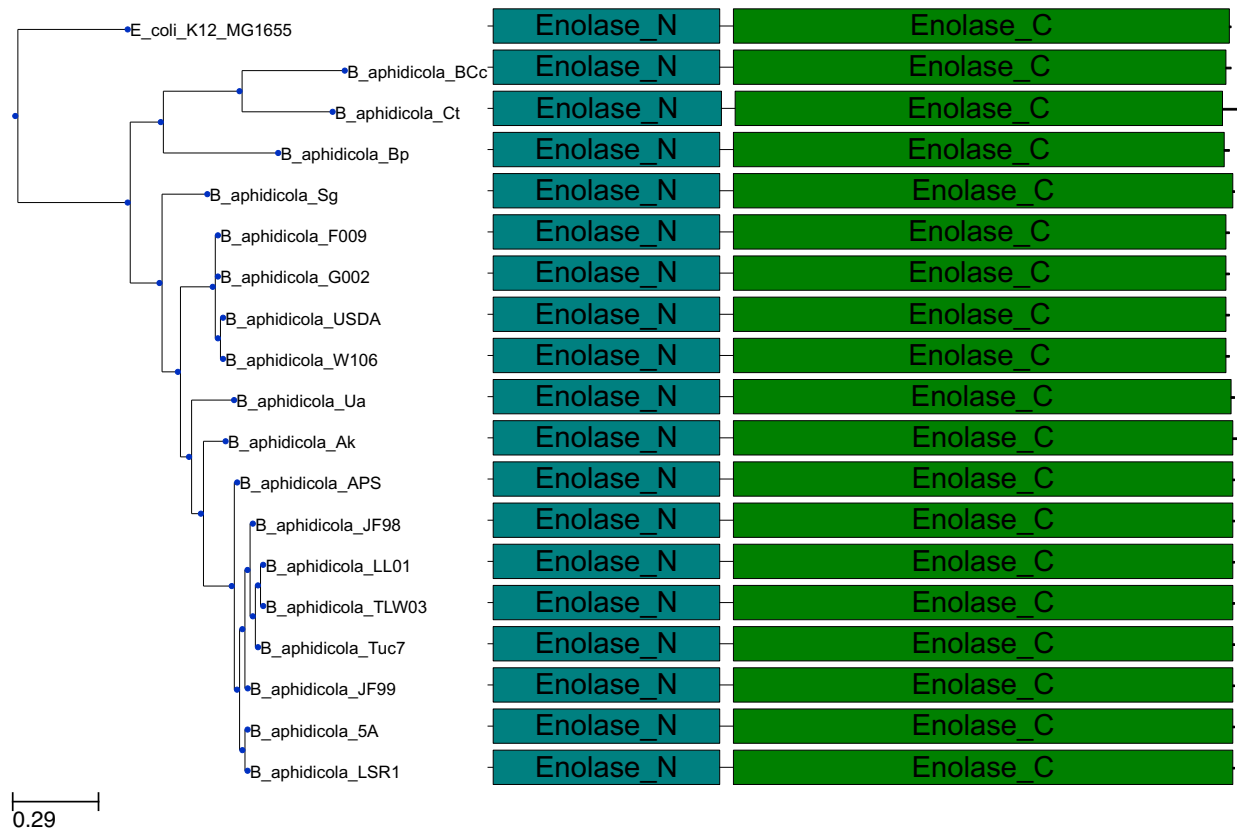

*eno*  
NP\_417259.1  
enolase

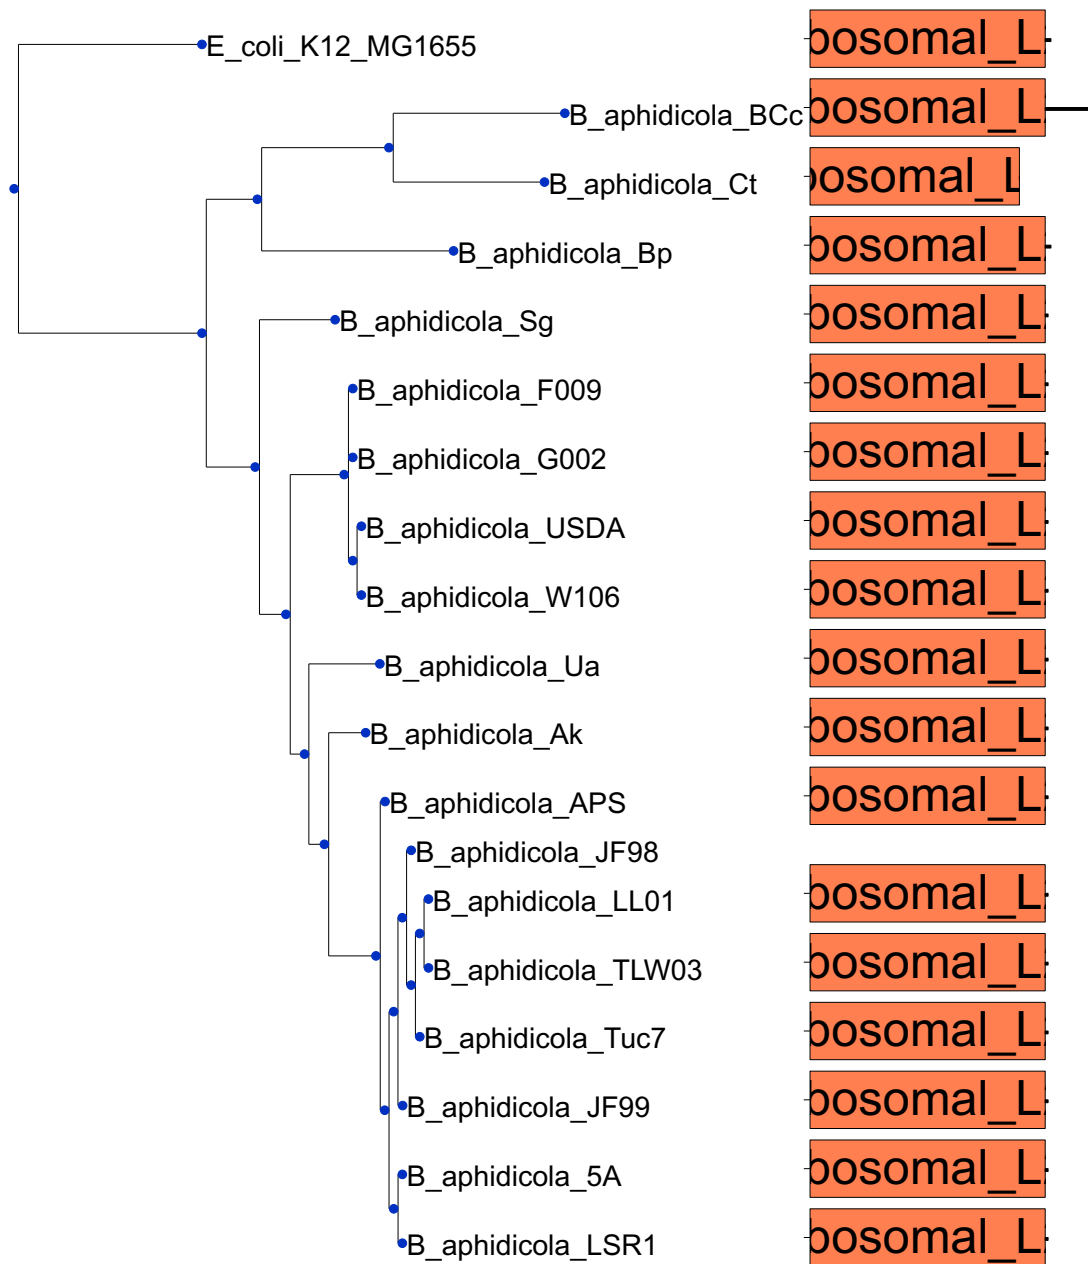

0.29

*rpmA*  
 NP\_417652.1  
 50S ribosomal subunit protein L27

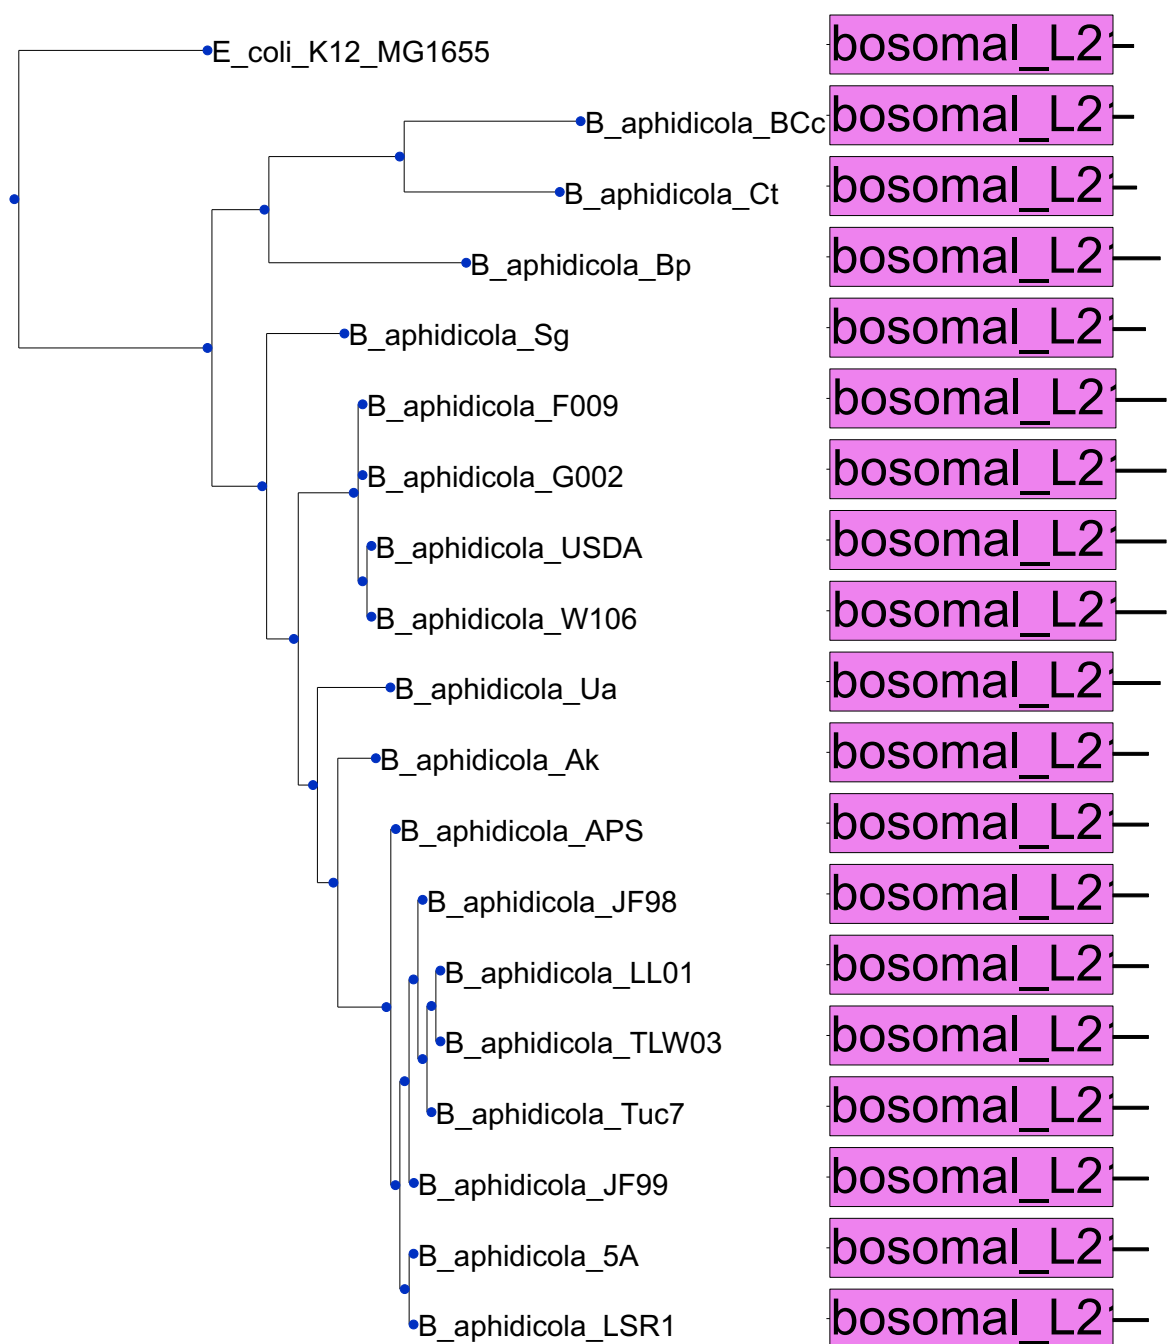

0.29

*rplU*  
 NP\_417653.1  
 50S ribosomal subunit protein L21



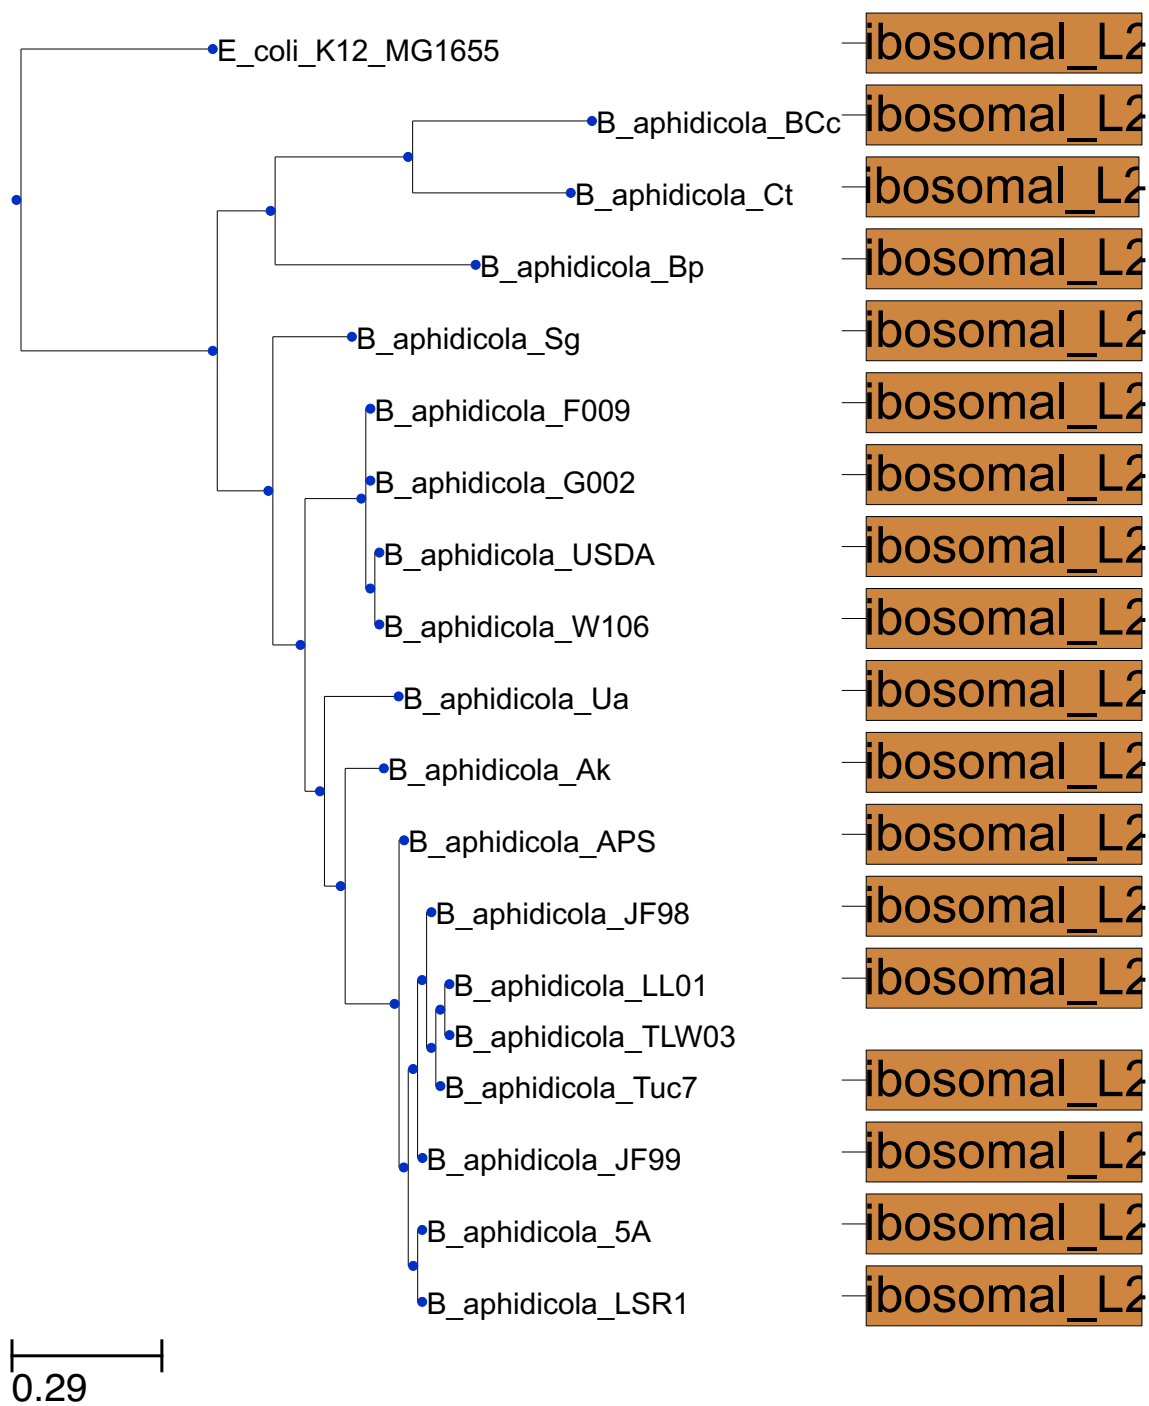

*rplW*  
NP\_417777.1  
50S ribosomal subunit protein L23

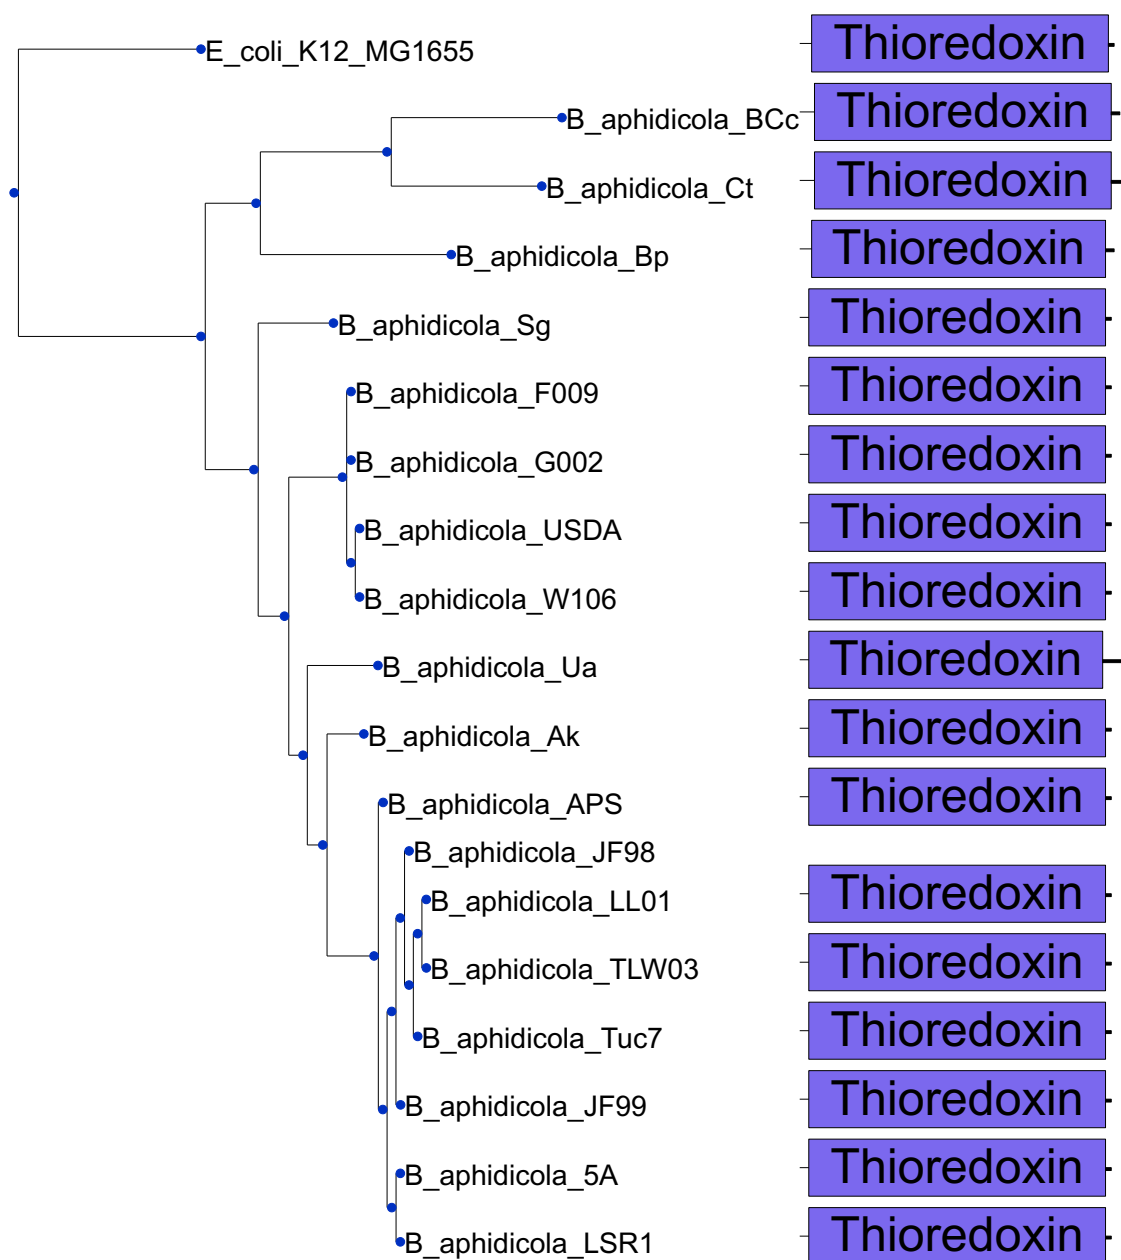

0.29

*trxA*  
NP\_418228.2  
thioredoxin 1

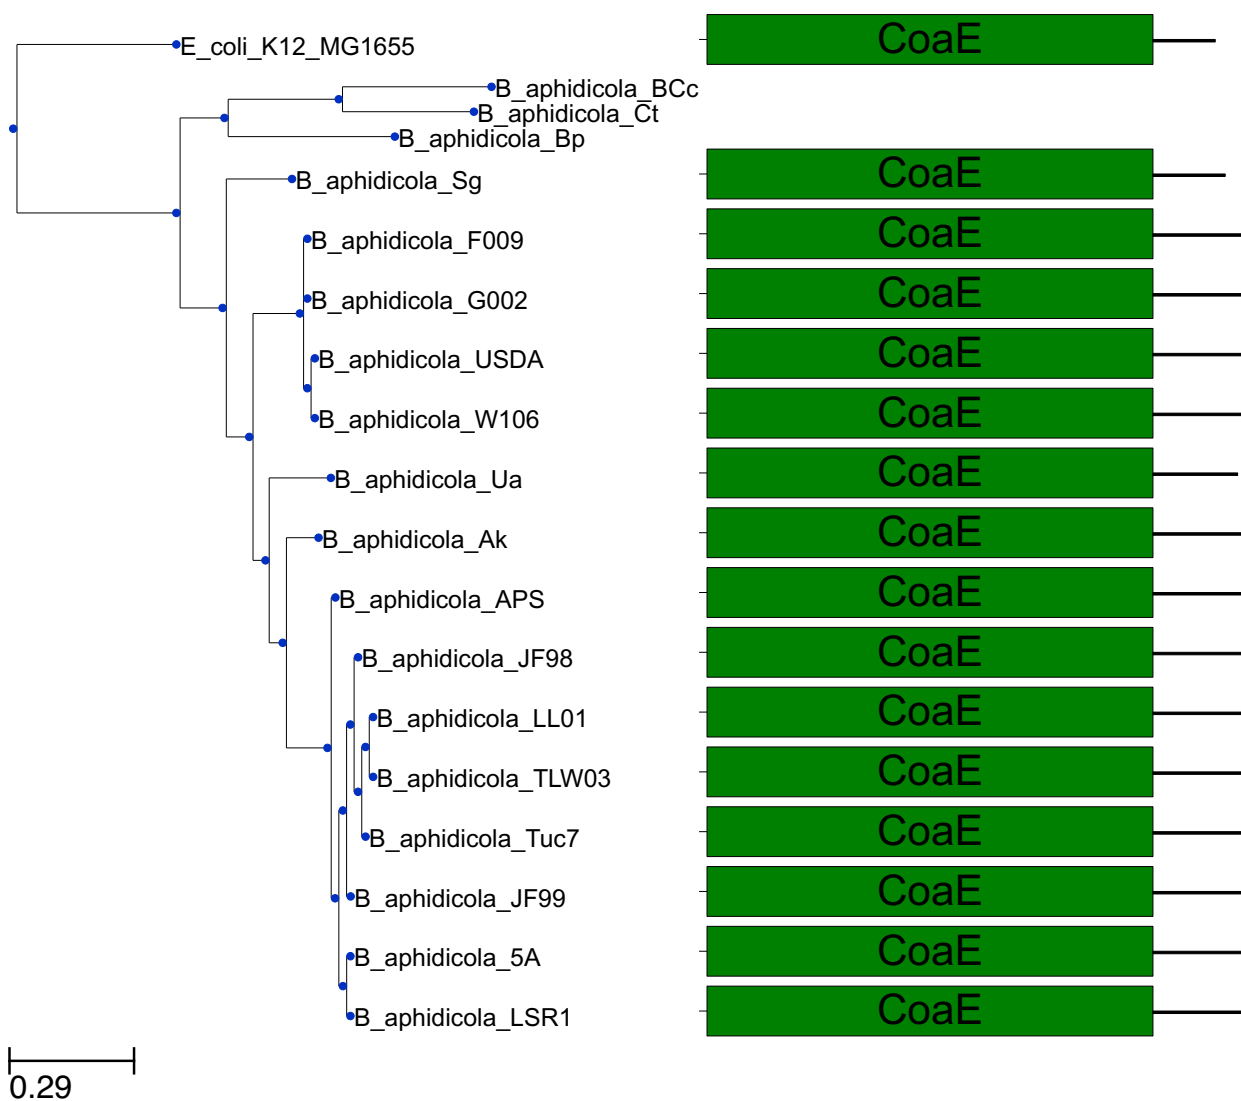

*coaE*  
NP\_414645.1  
dephospho-CoA kinase

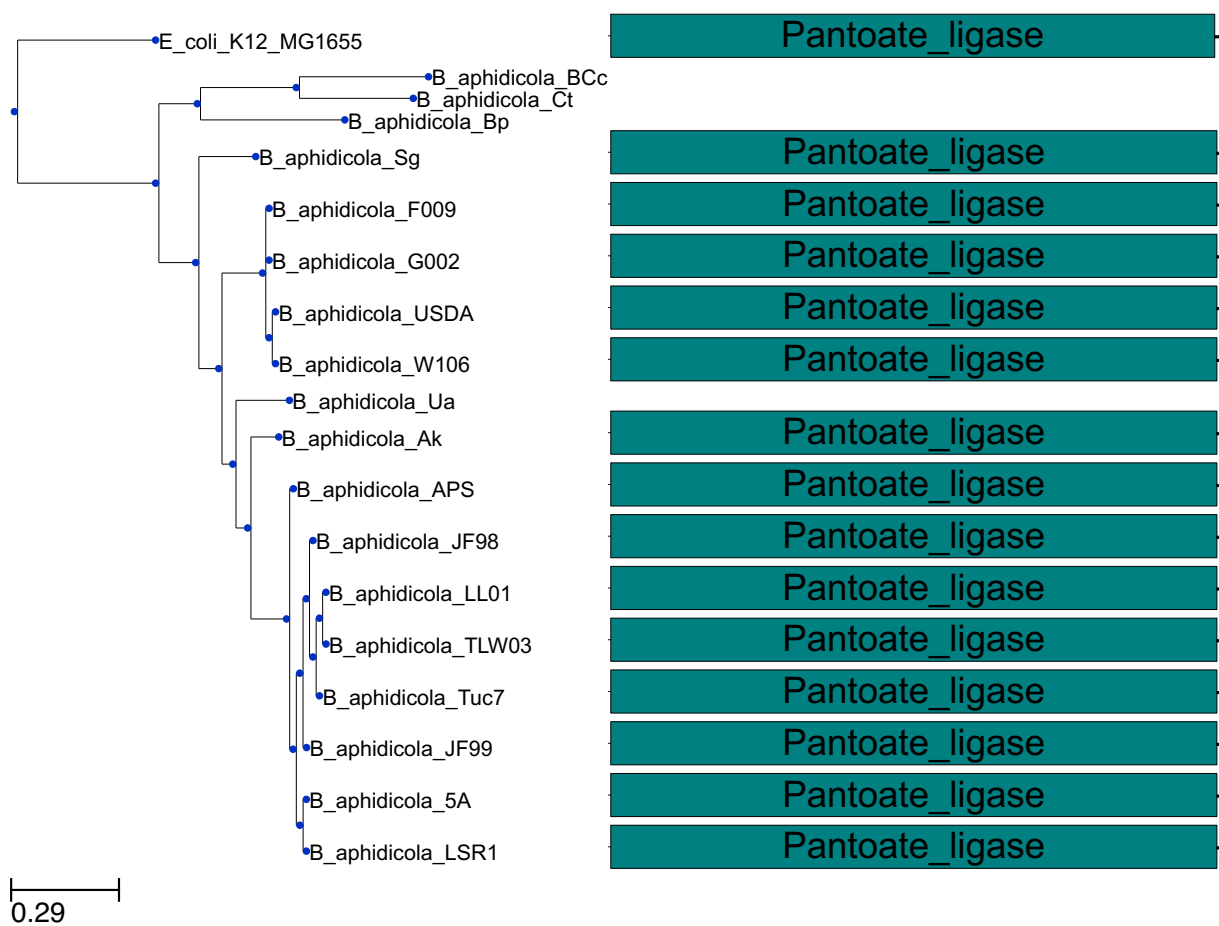

*panC*  
NP\_414675.1  
pantothenate synthetase

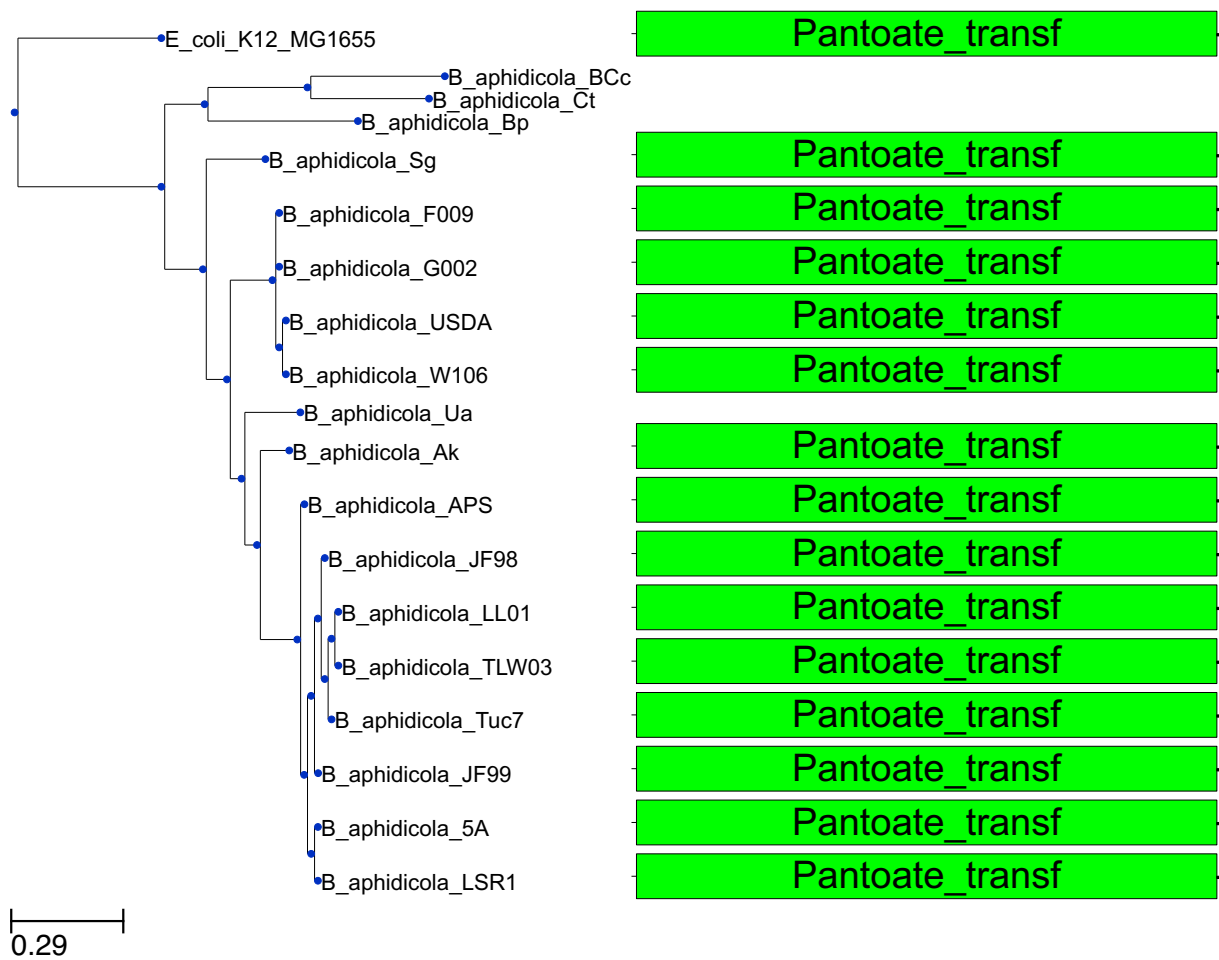

*panB*  
 NP\_414676.1  
 3-methyl-2-oxobutanoate hydroxymethyltransferase

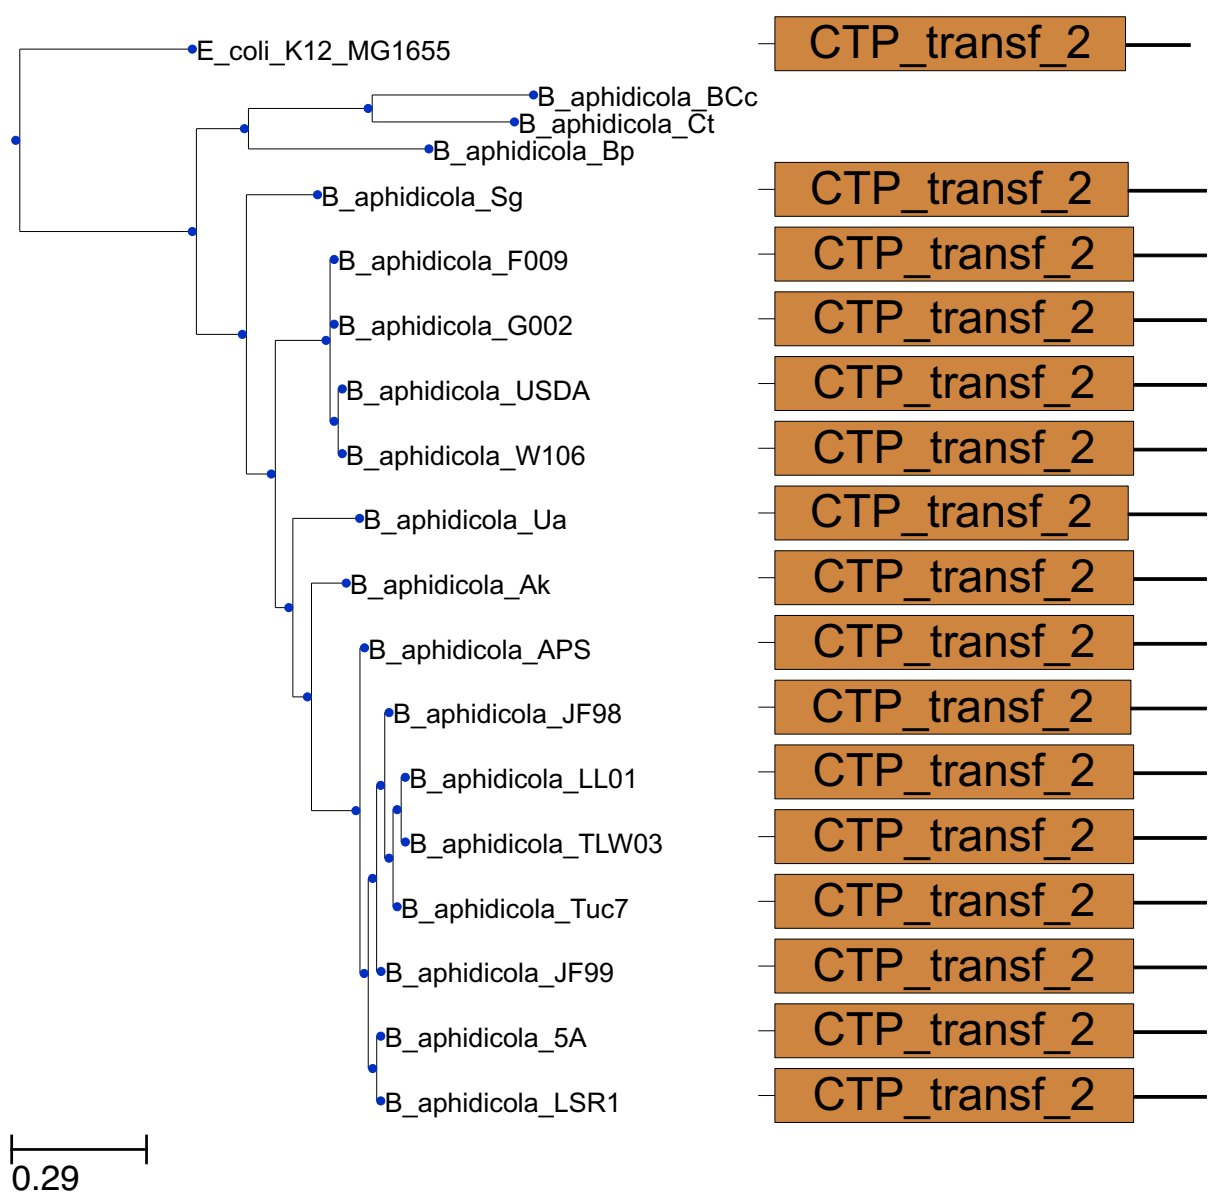

*coaD*  
NP\_418091.1  
pantetheine-phosphate adenylyltransferase

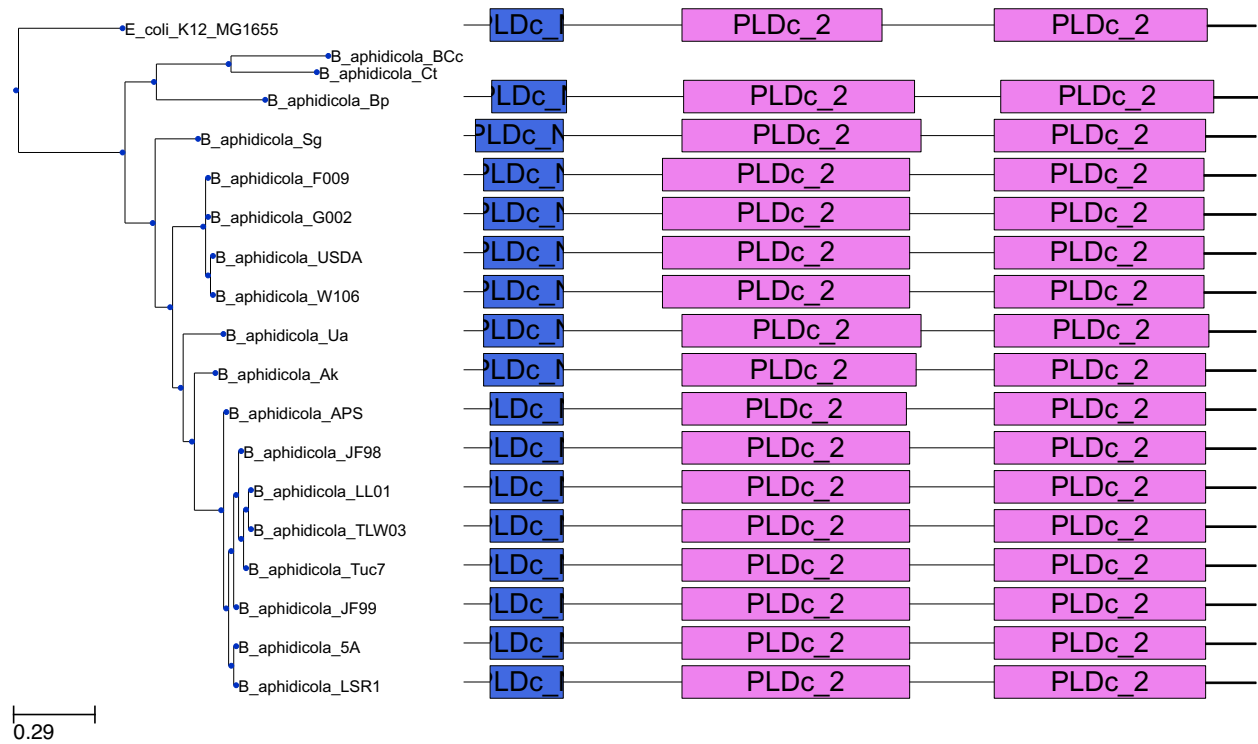

*cls*  
NP\_415765.1  
cardiolipin synthase 1

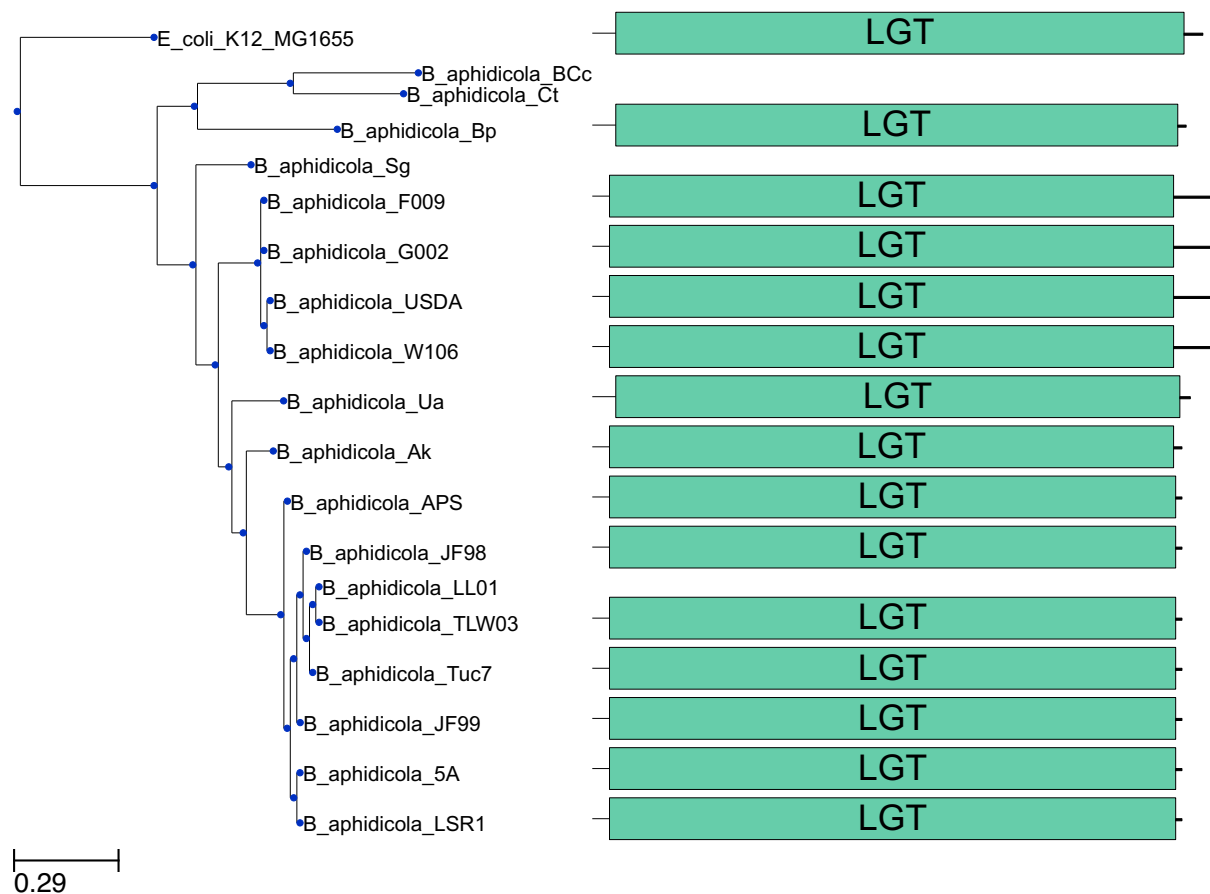

*lgt*

NP\_417305.1

phosphatidylglycerol-prolipoprotein diacylglyceryl transferase



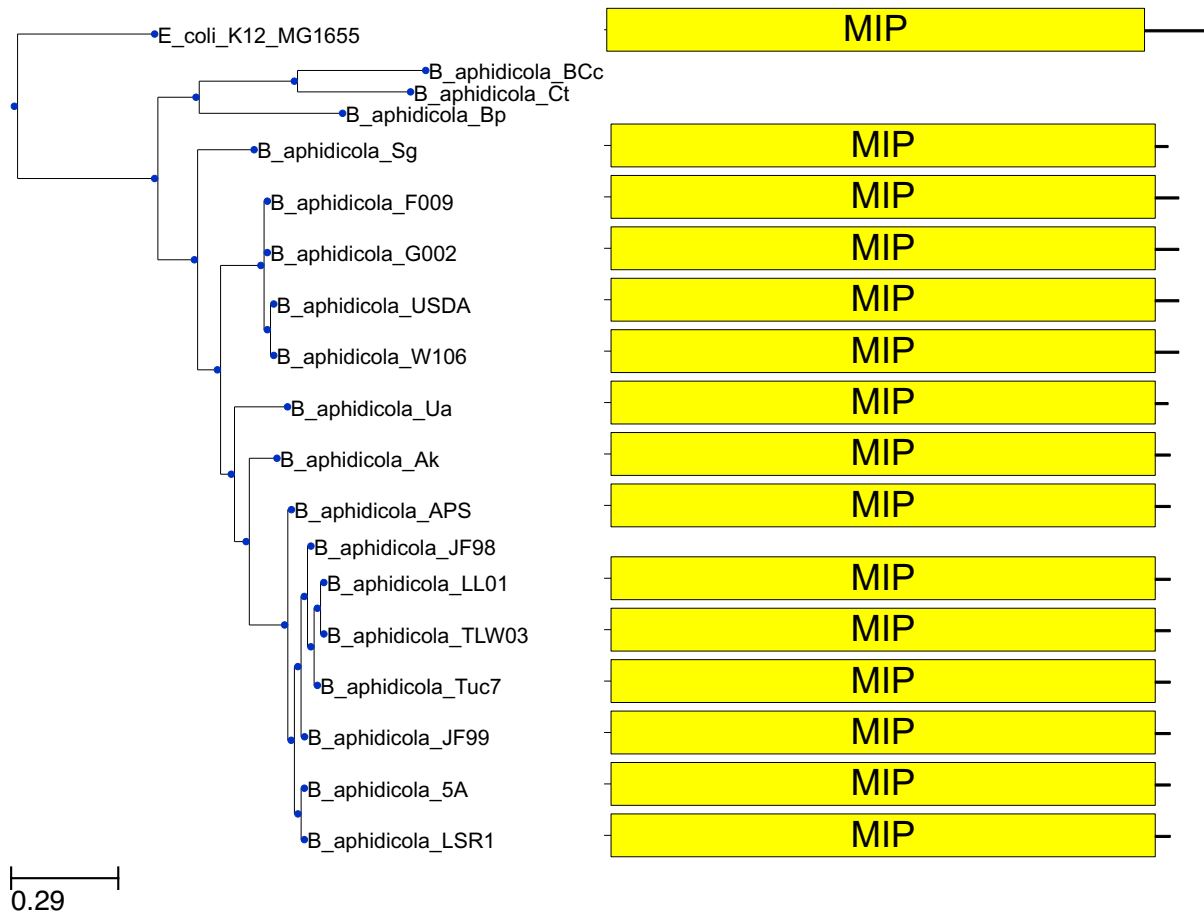

*glpF*  
NP\_418362.1  
glycerol facilitator

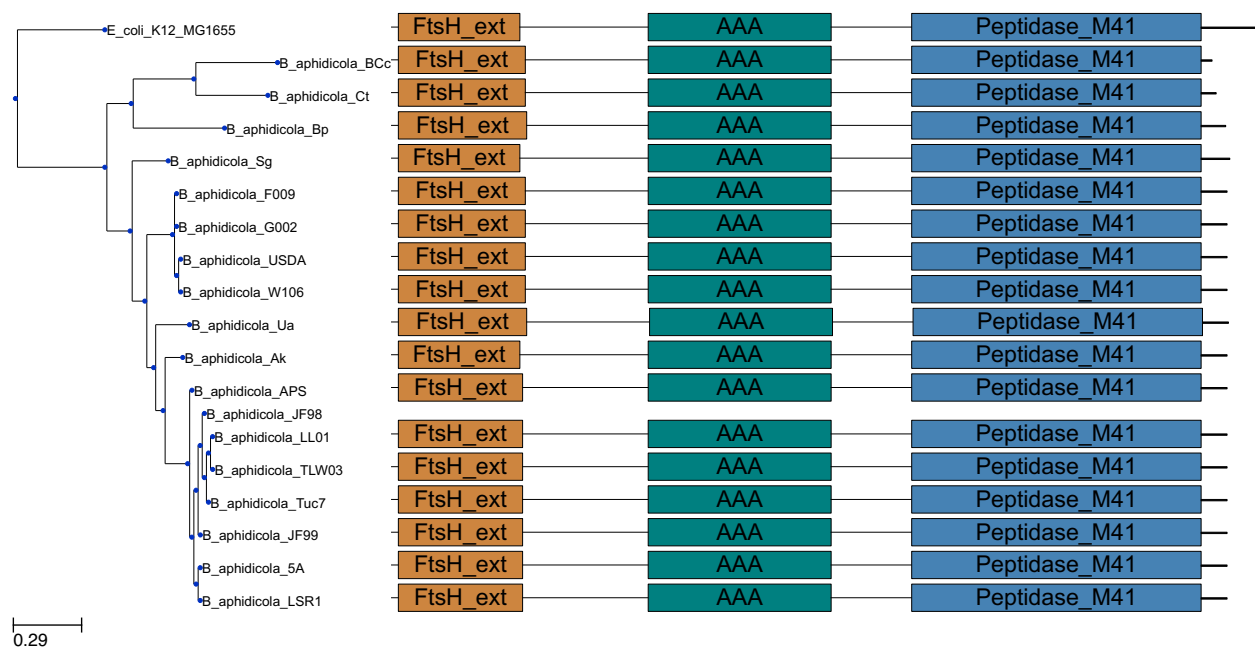

*ftsH*

NP\_417645.1

"protease, ATP-dependent zinc-metallo"

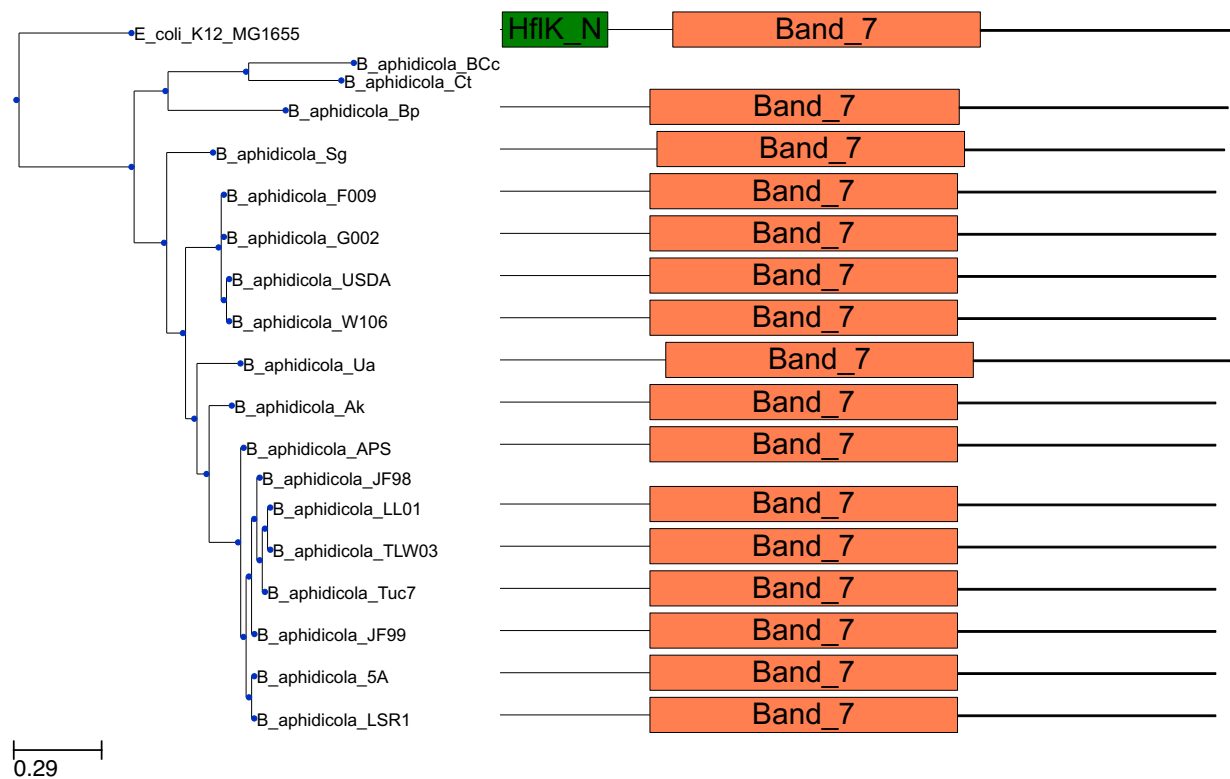

*hflK*

NP\_418595.1

modulator for HflB protease specific for phage lambda cII repressor

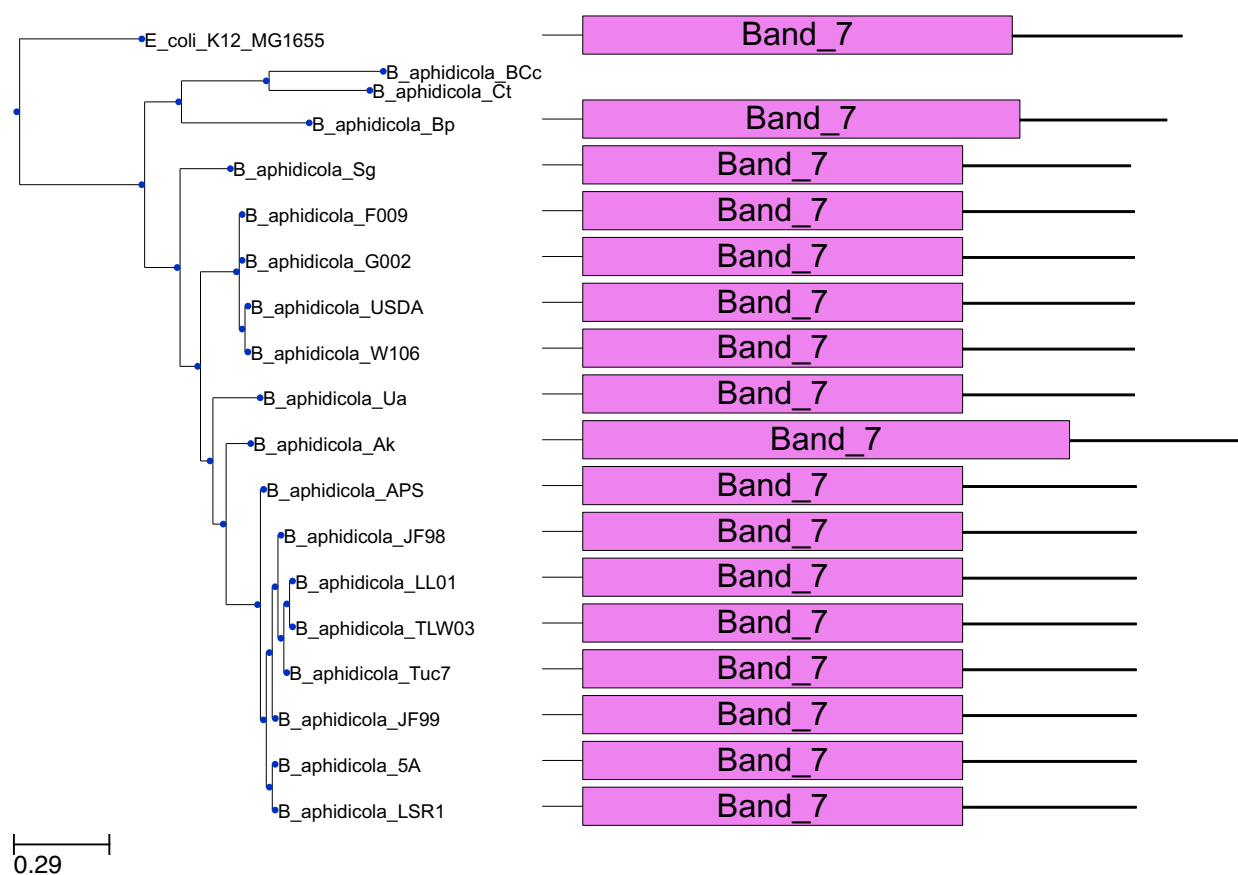

*hflC*

NP\_418596.1

HflB protease modulator specific for phage lambda cII repressor

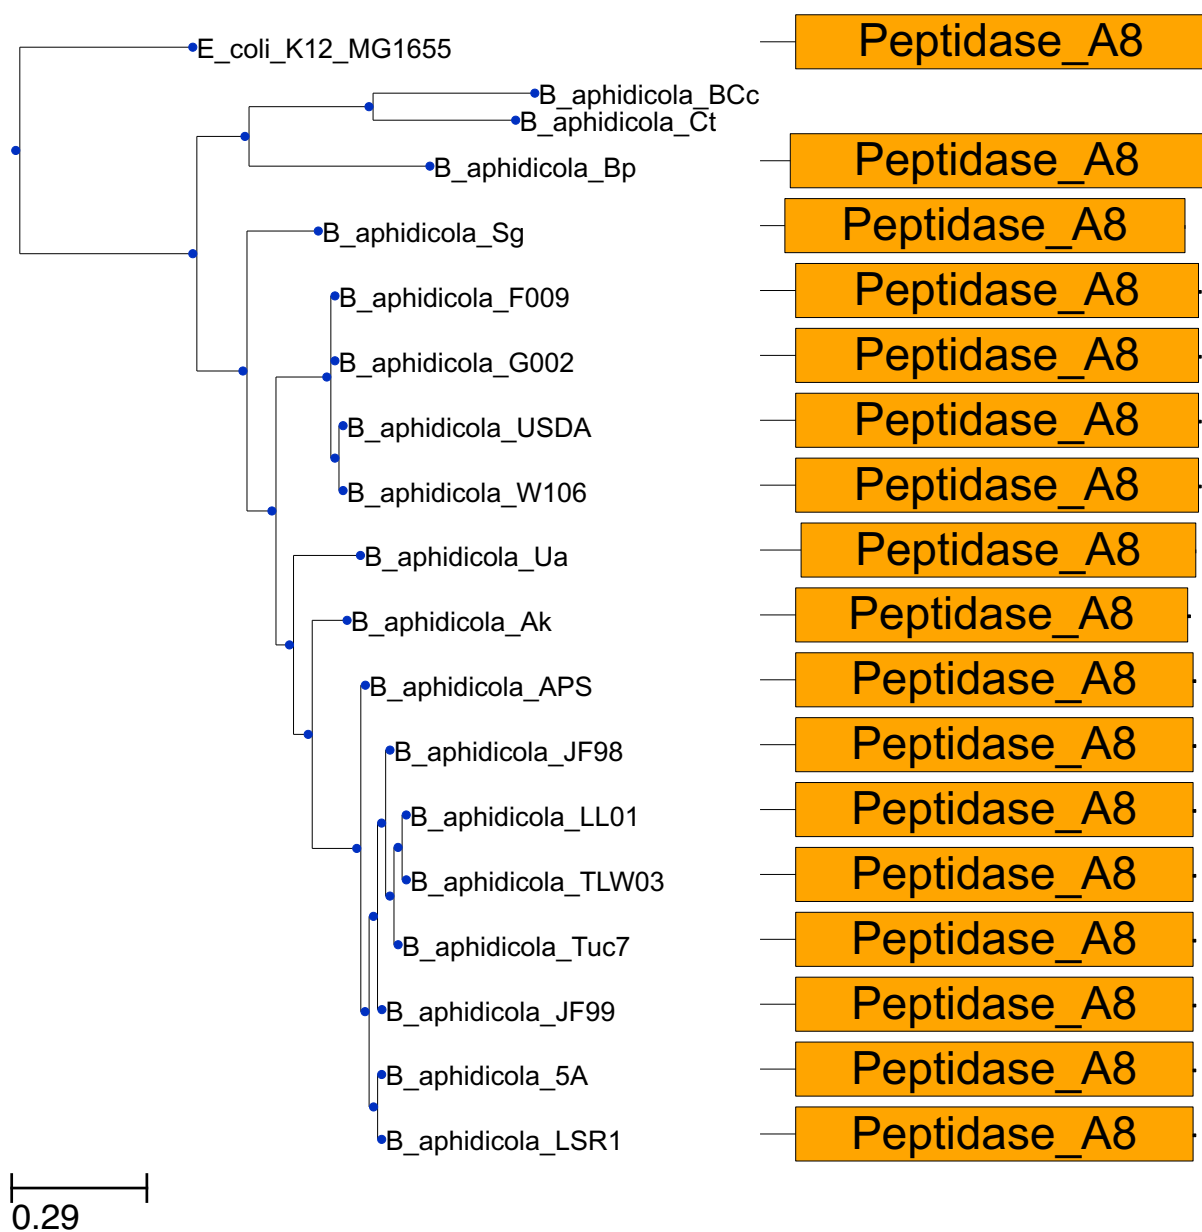

*LspA*  
NP\_414568.1  
prolipoprotein signal peptidase (signal peptidase II)

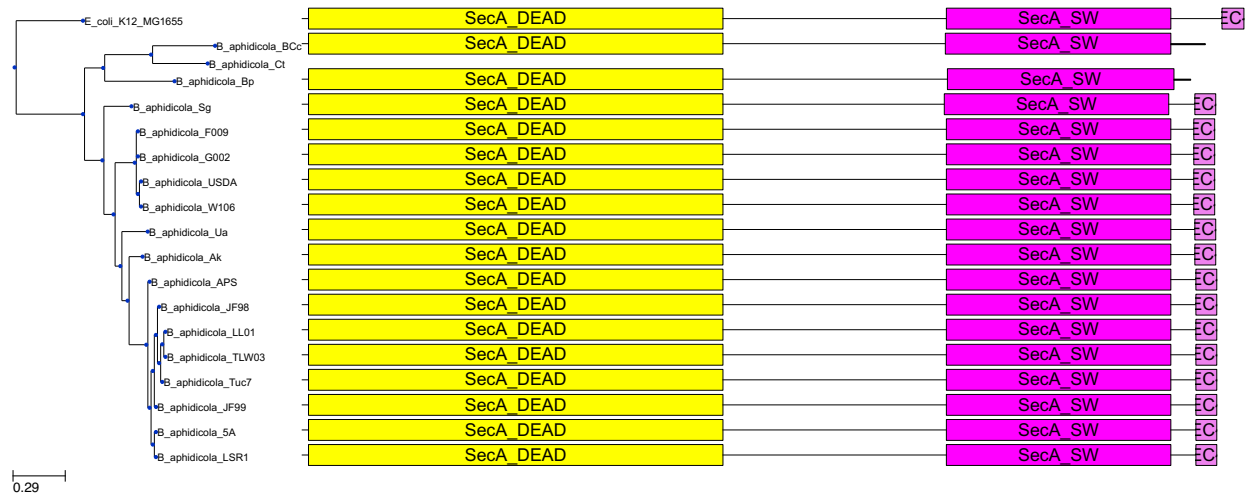

*secA*  
NP\_414640.1  
"preprotein translocase subunit, ATPase"

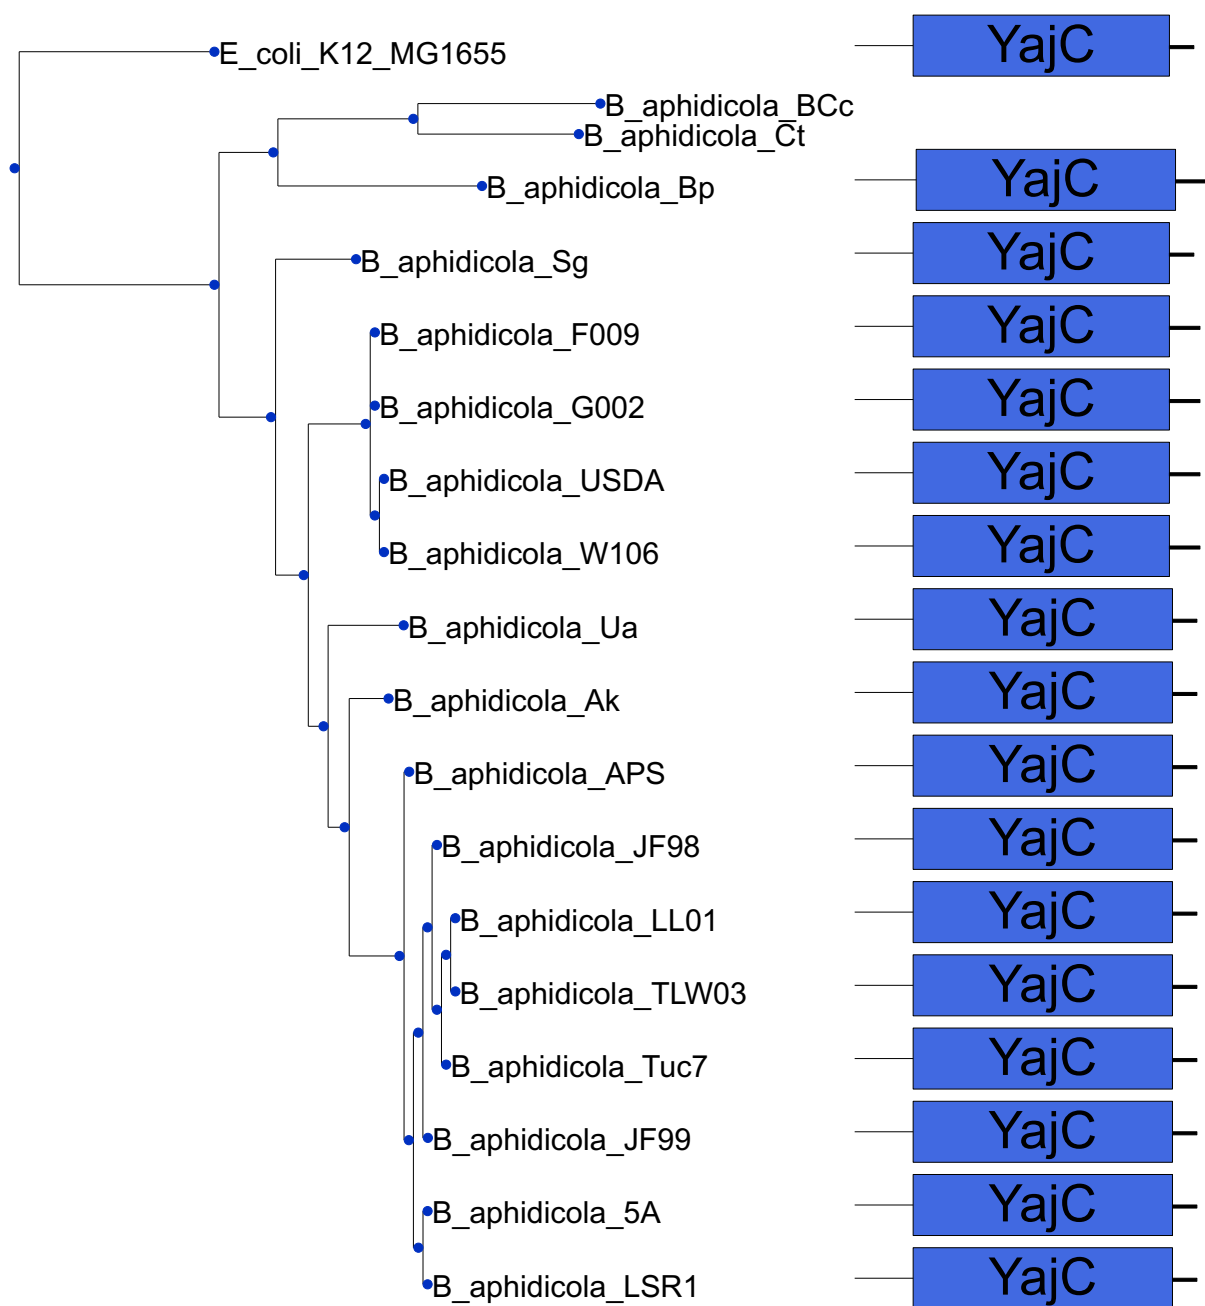

0.29

*yajC*  
NP\_414941.1  
SecYEG protein translocase auxillary subunit

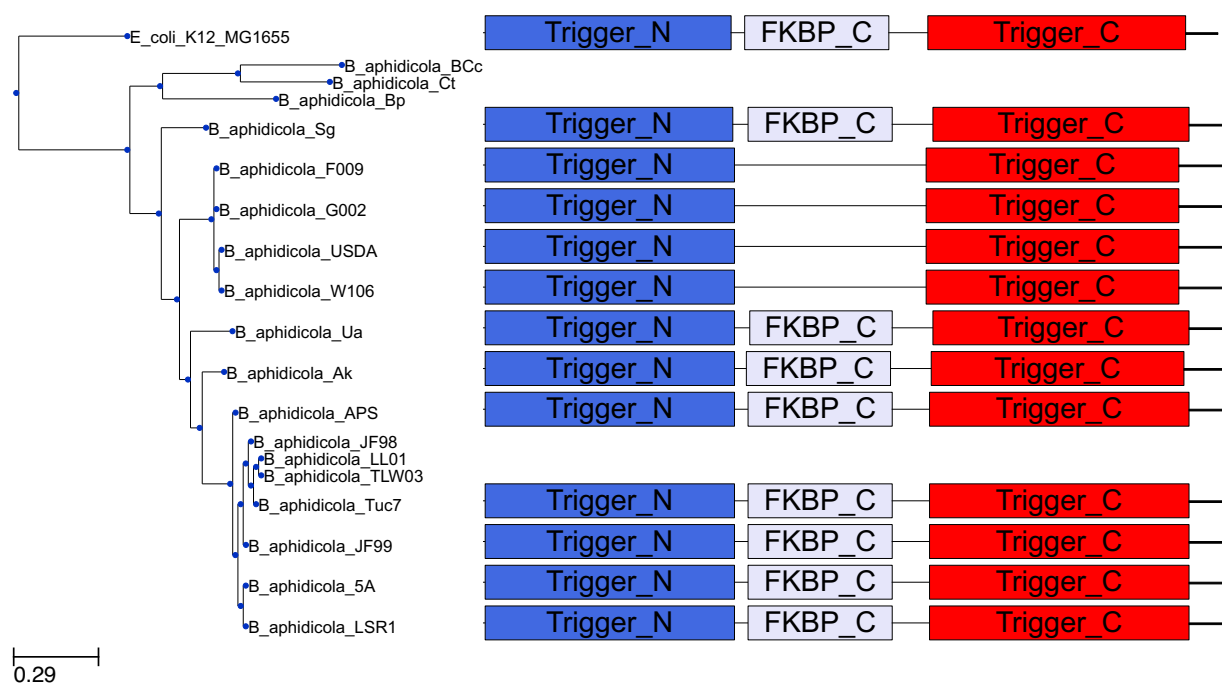

*tig*  
NP\_414970.1  
peptidyl-prolyl cis/trans isomerase (trigger factor)



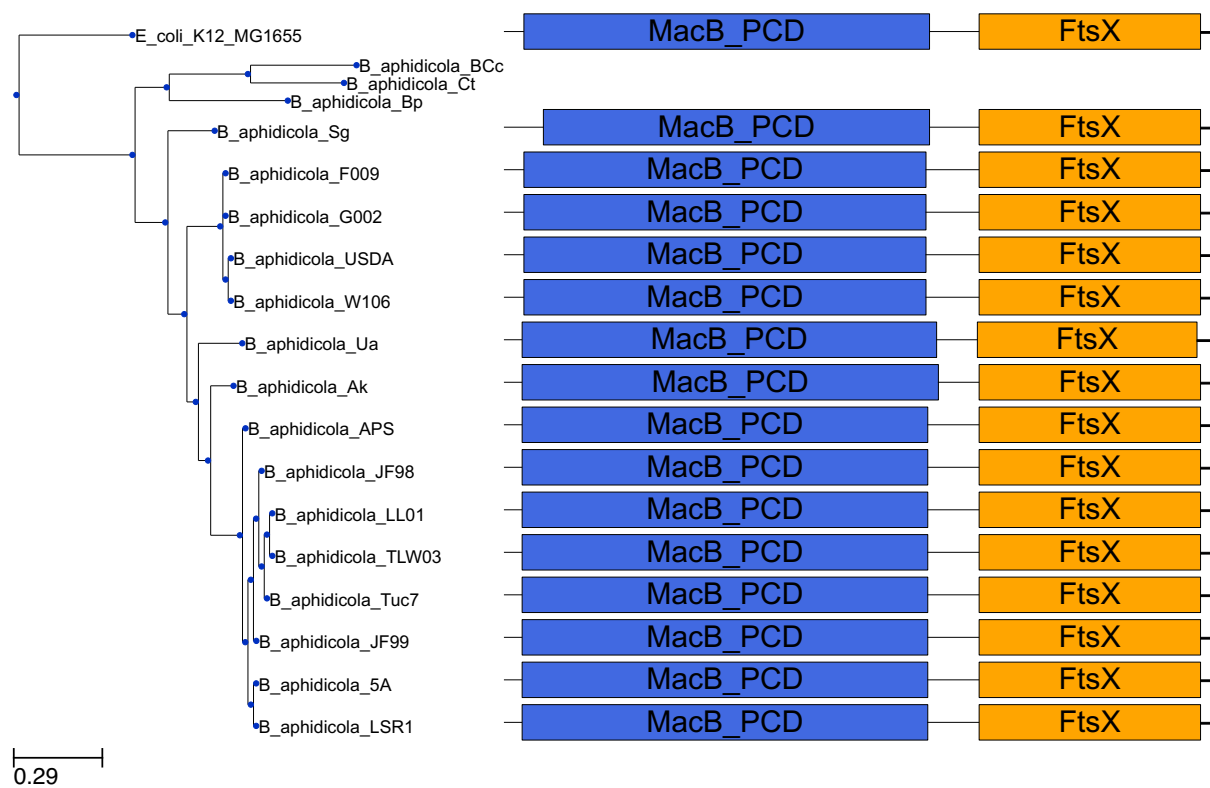

*loIC*  
NP\_415634.1  
lipoprotein-releasing system transmembrane protein

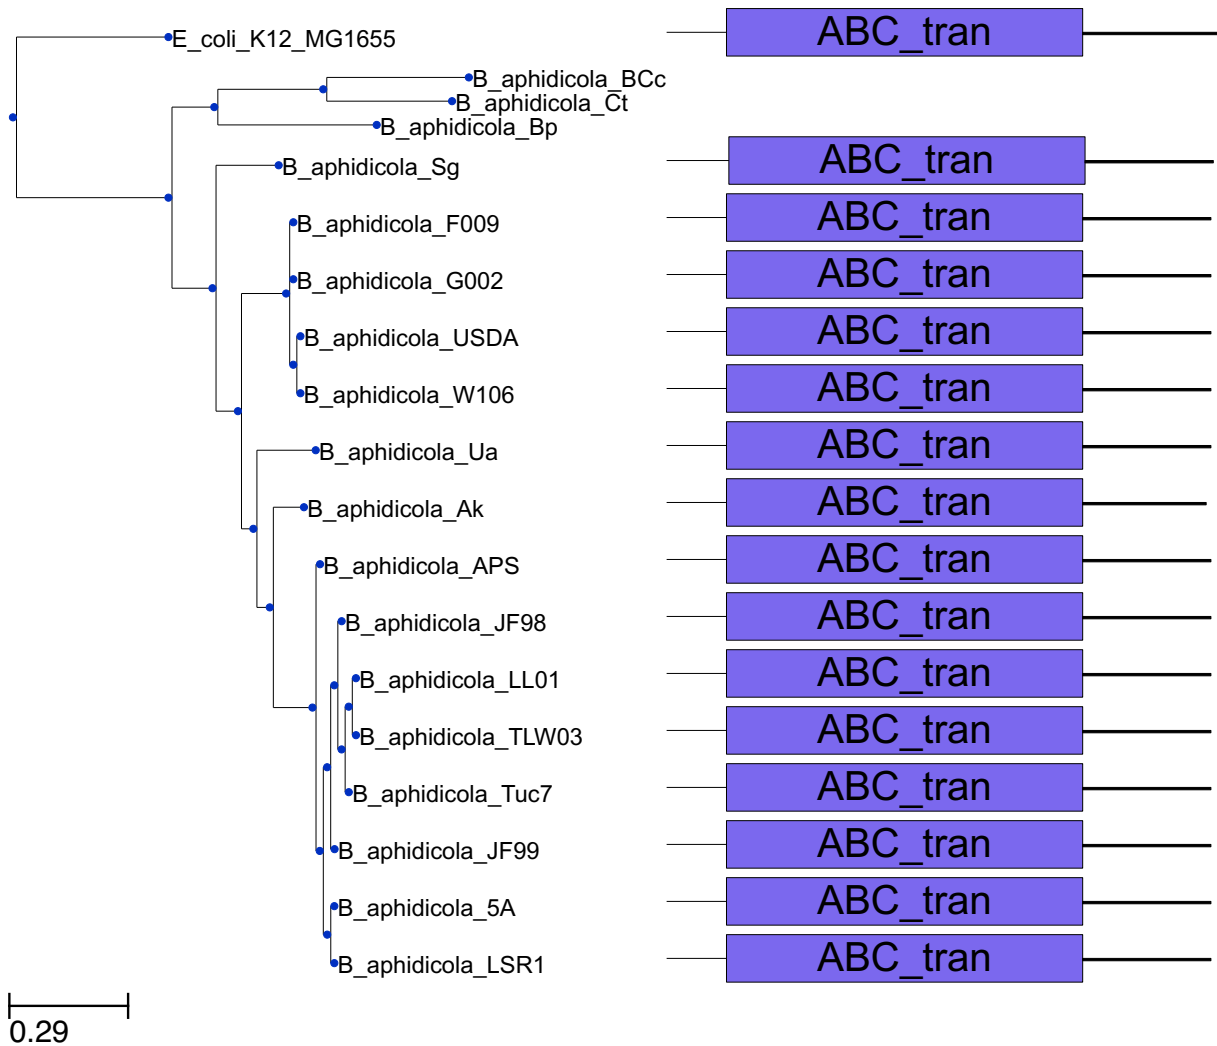

*loID*  
NP\_415635.4  
outer membrane-specific lipoprotein transporter subunit

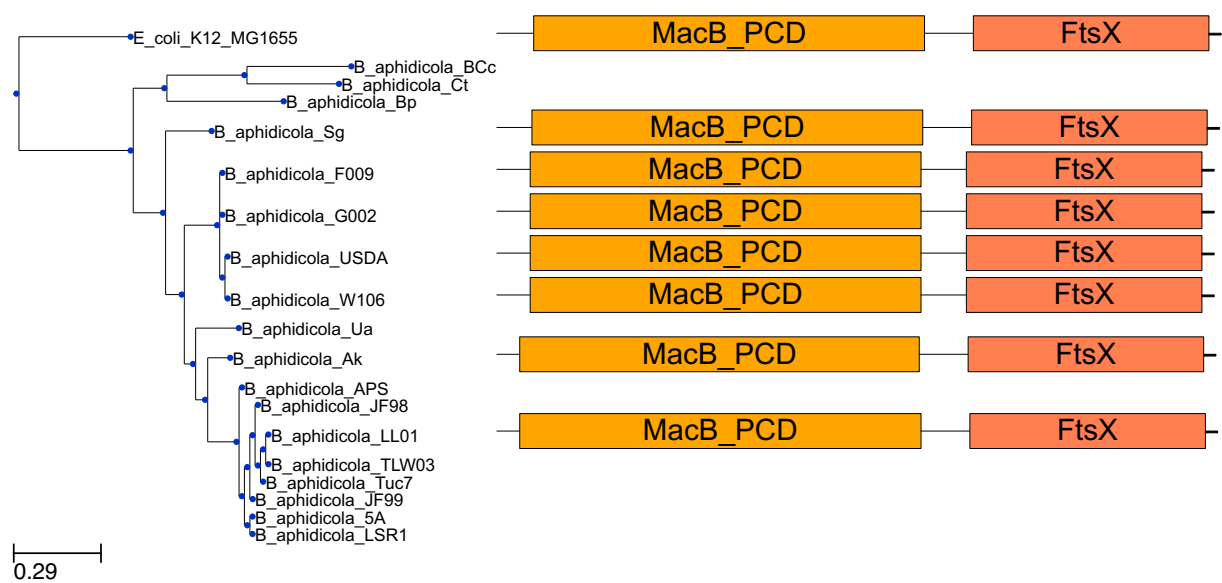

*loIE*

NP\_415636.1

lipoprotein-releasing system transmembrane protein

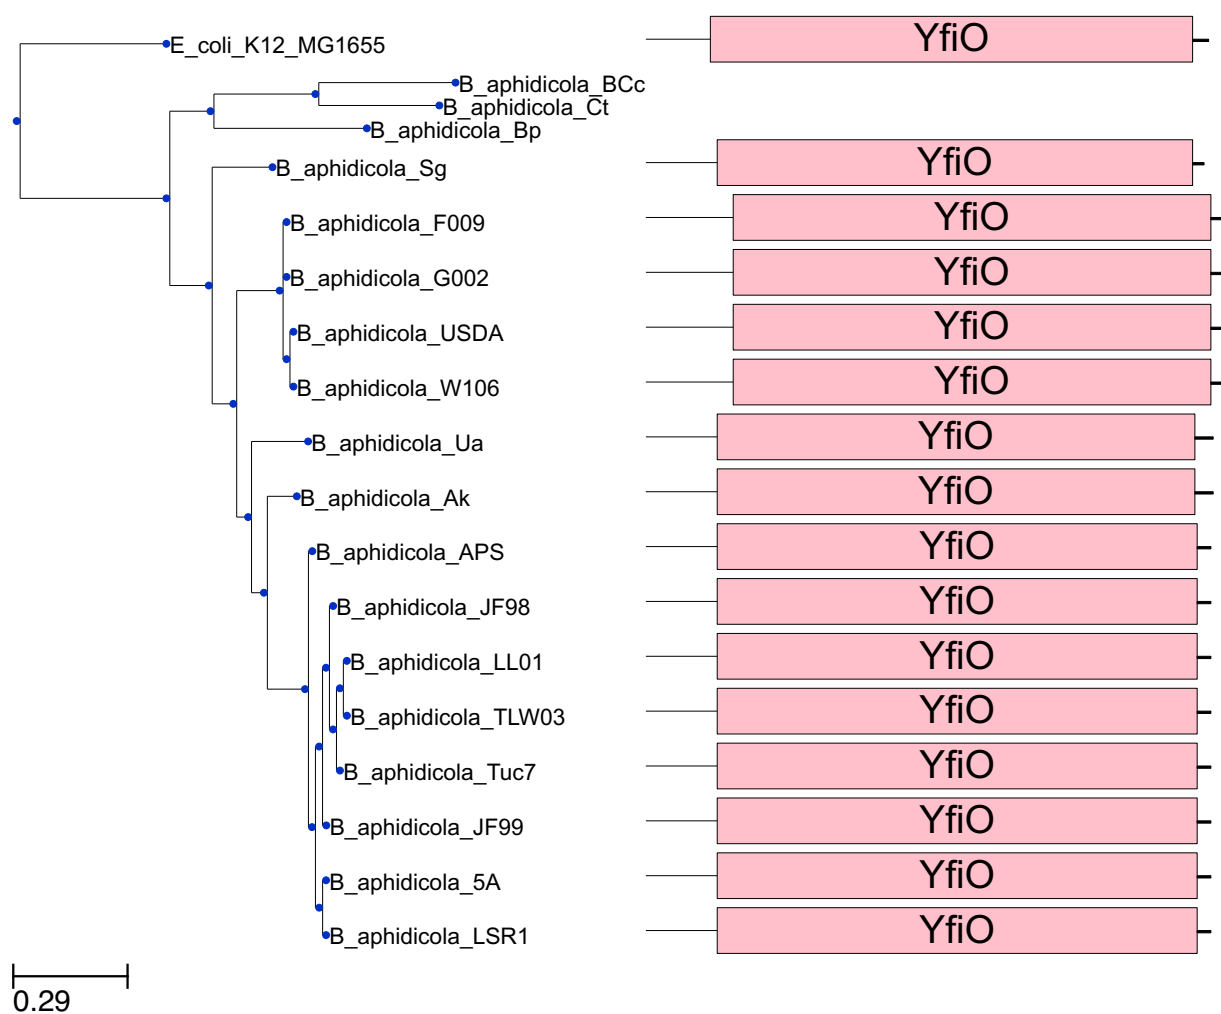

*yfiO*

NP\_417086.1

BamABCDE complex OM biogenesis lipoprotein

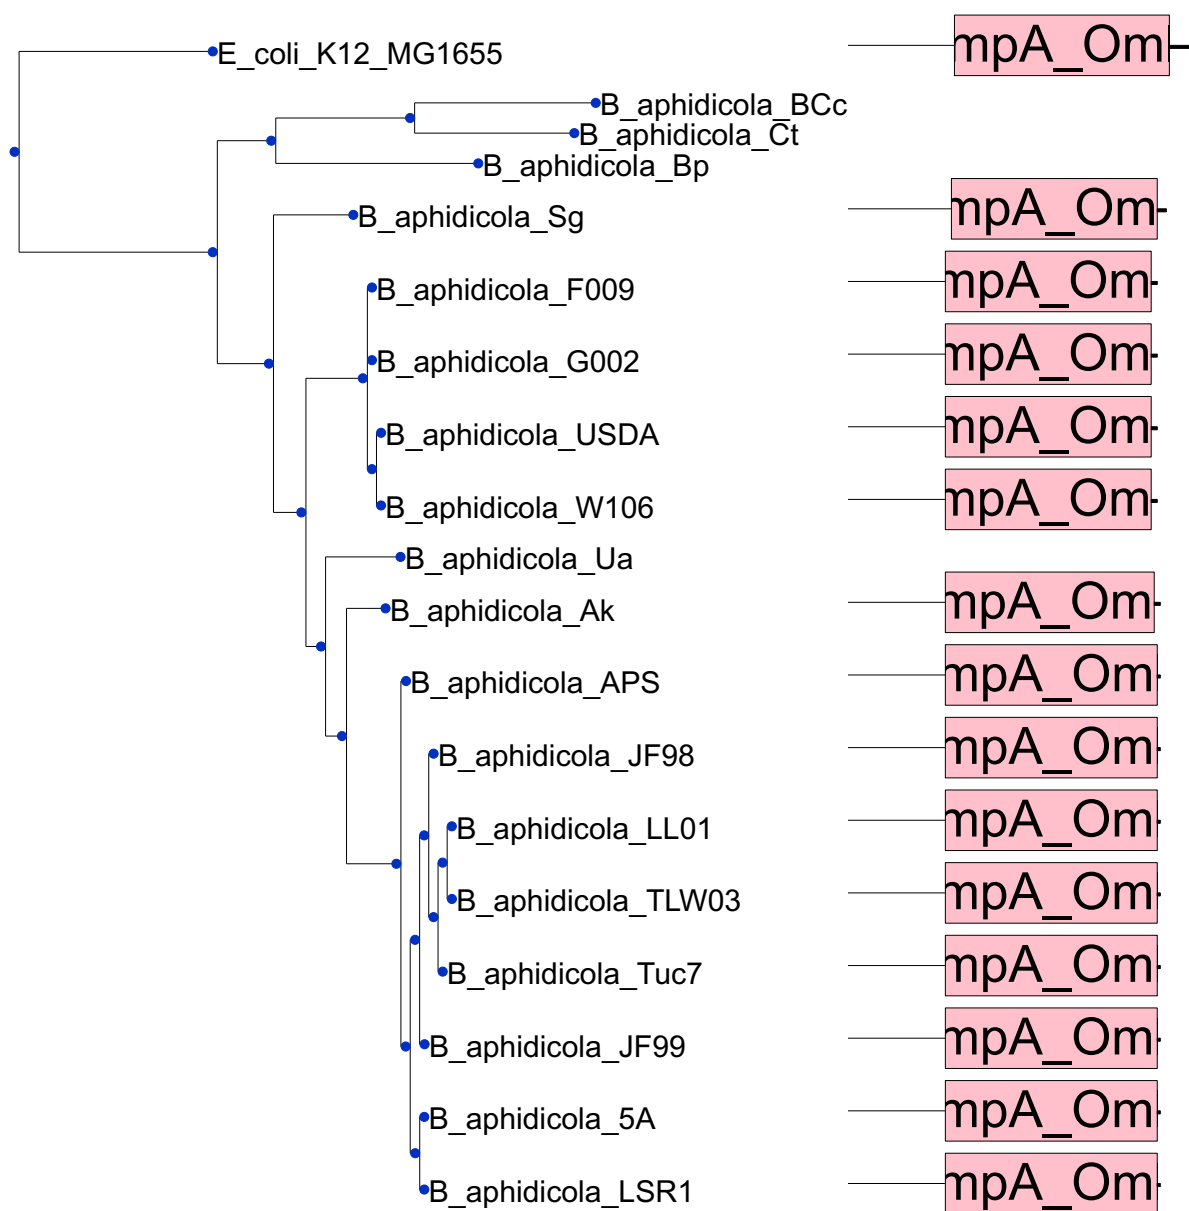

0.29

*smpA*

NP\_417107.2

lipoprotein component of BamABCDE OM biogenesis complex

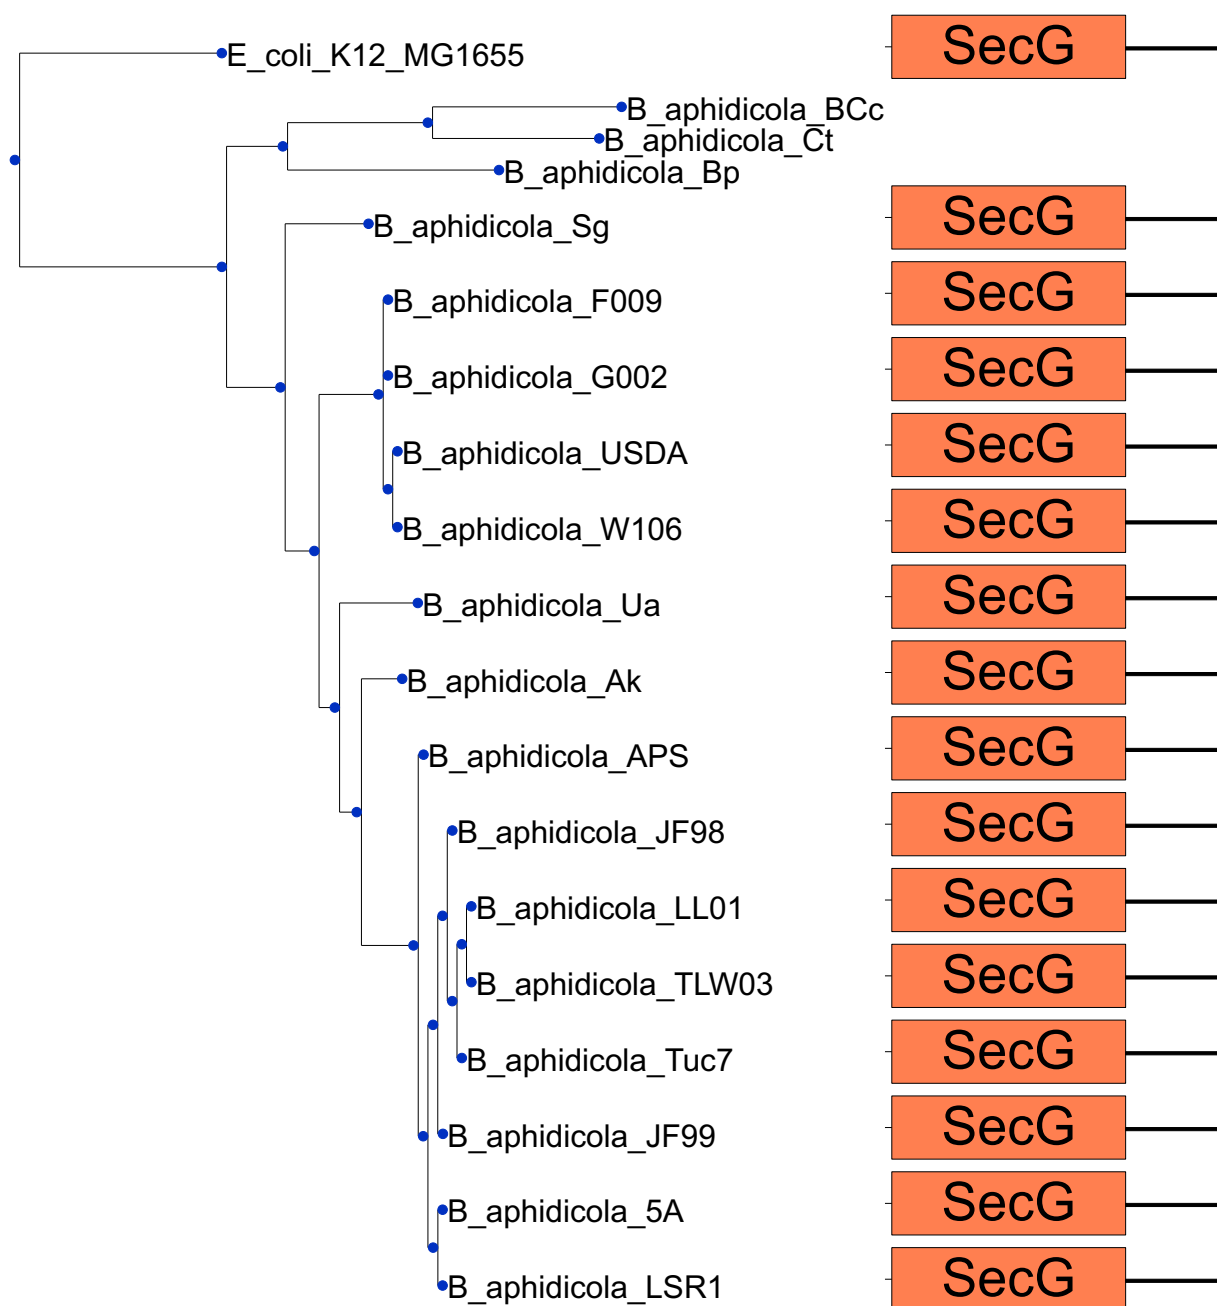

0.29

*secG*  
 NP\_417642.1  
 preprotein translocase membrane subunit

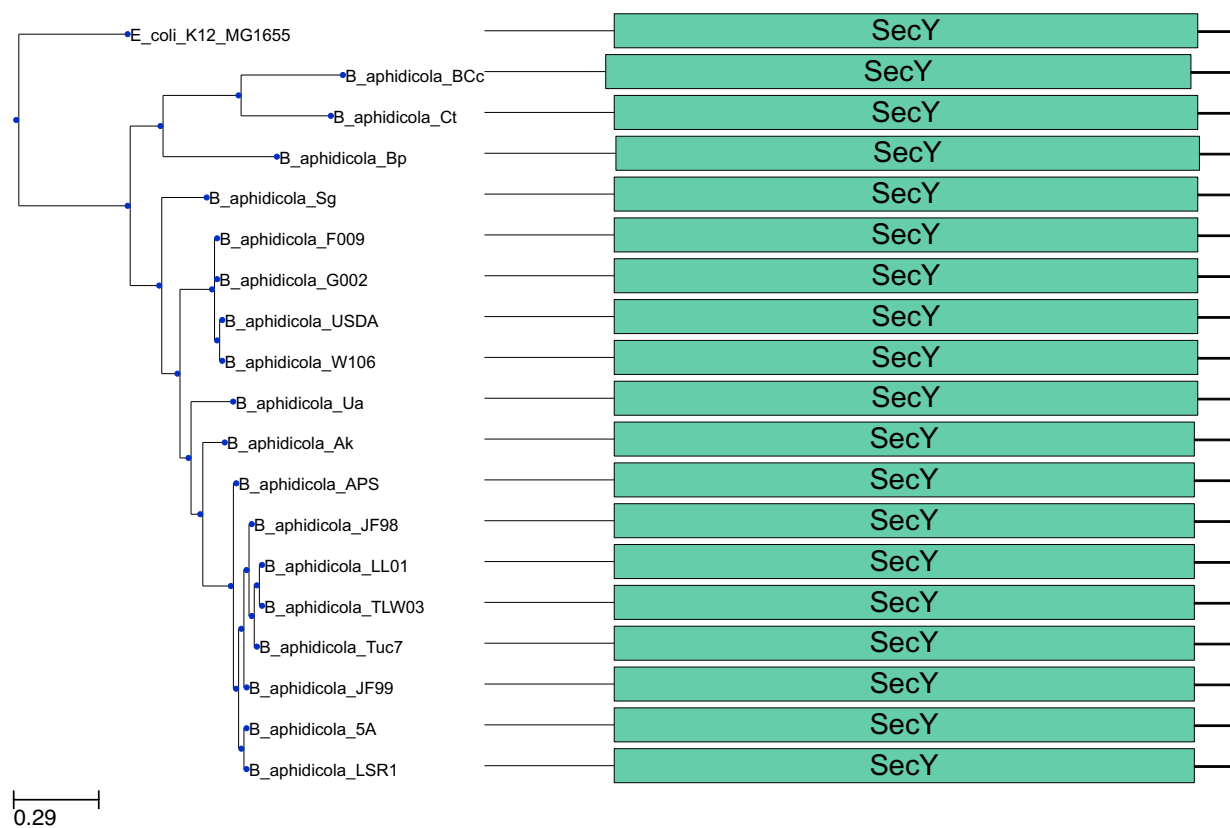

*secY*  
NP\_417759.1  
preprotein translocase membrane subunit

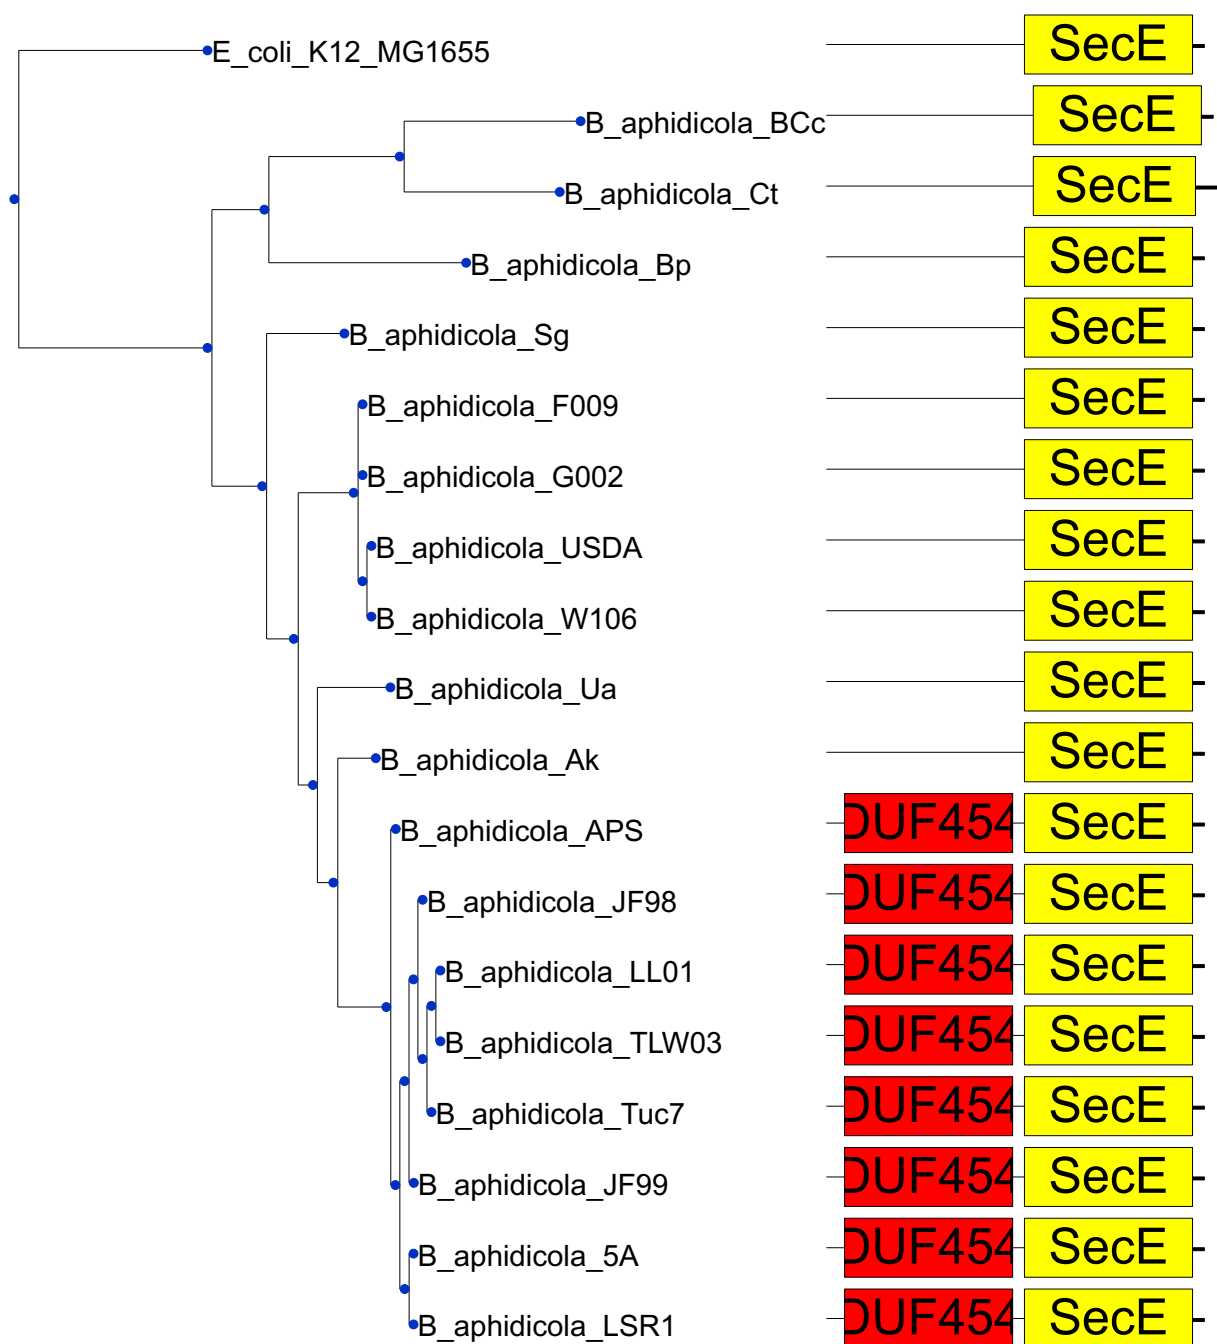

0.29

*secE*  
NP\_418408.1  
preprotein translocase membrane subunit



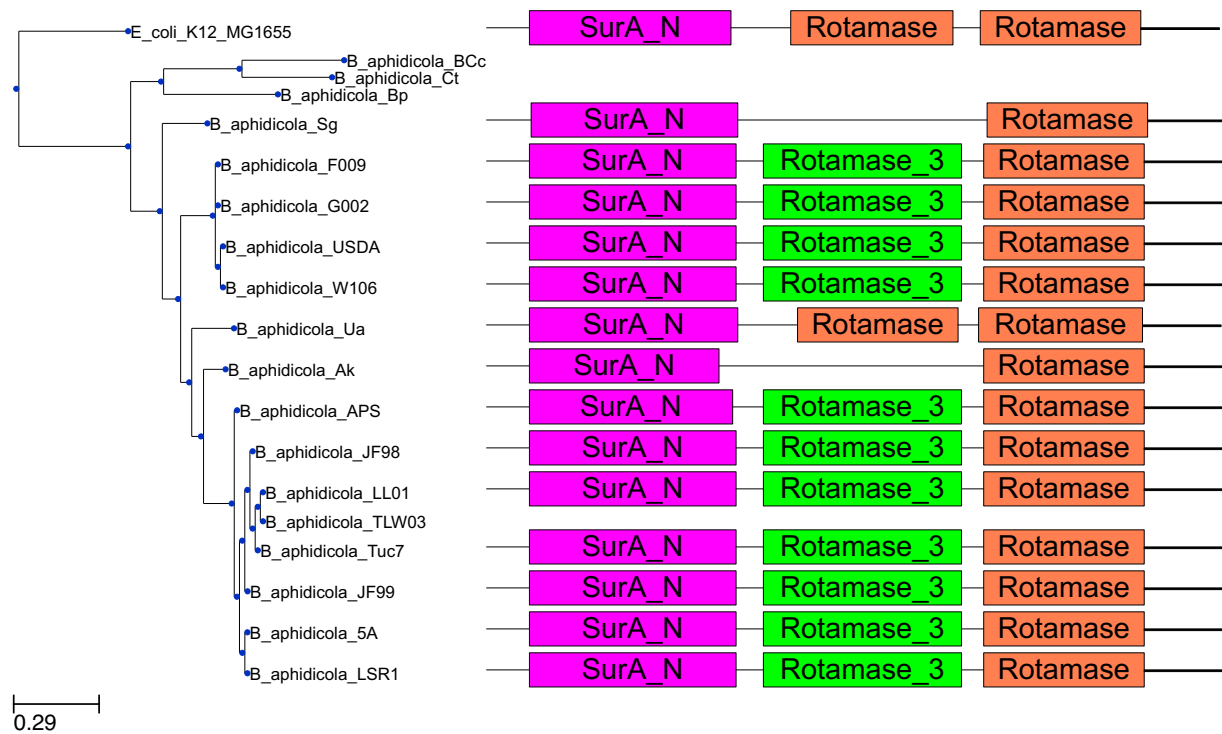

*surA*  
NP\_414595.1  
peptidyl-prolyl cis-trans isomerase (PPIase)

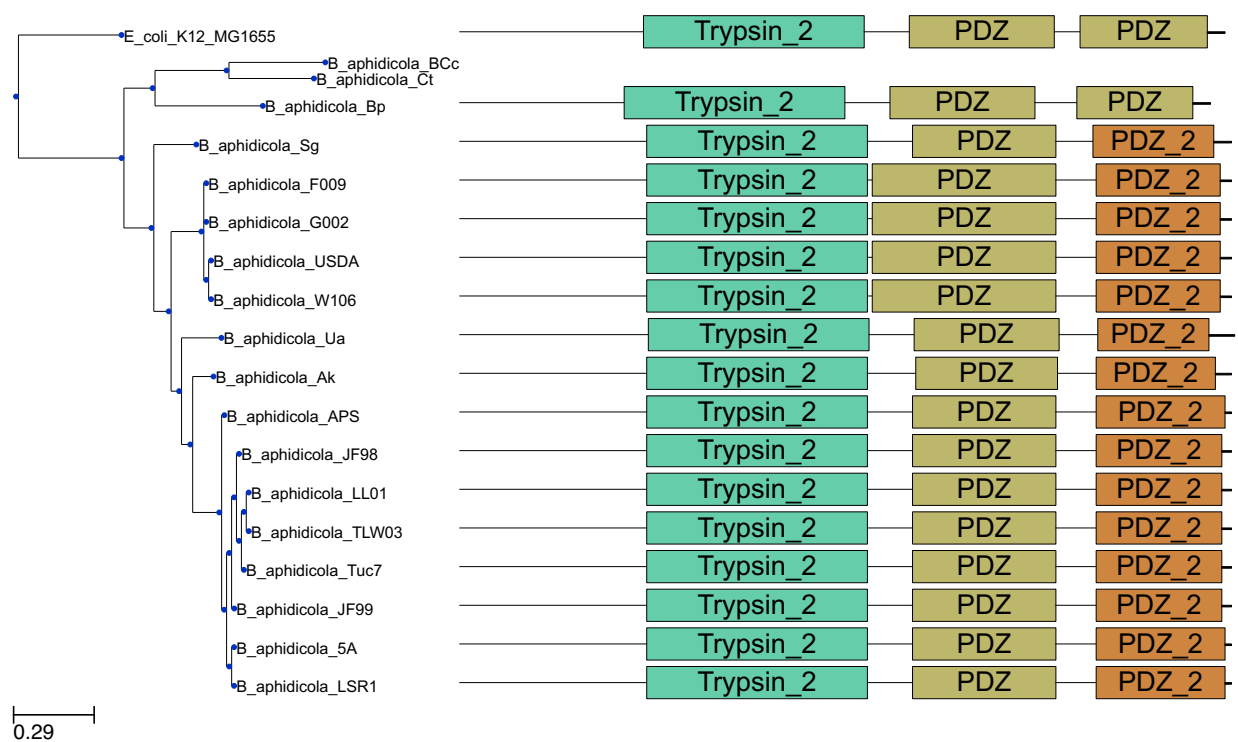

*degP*

NP\_414703.1

"serine endoprotease (protease Do), membrane-associated"

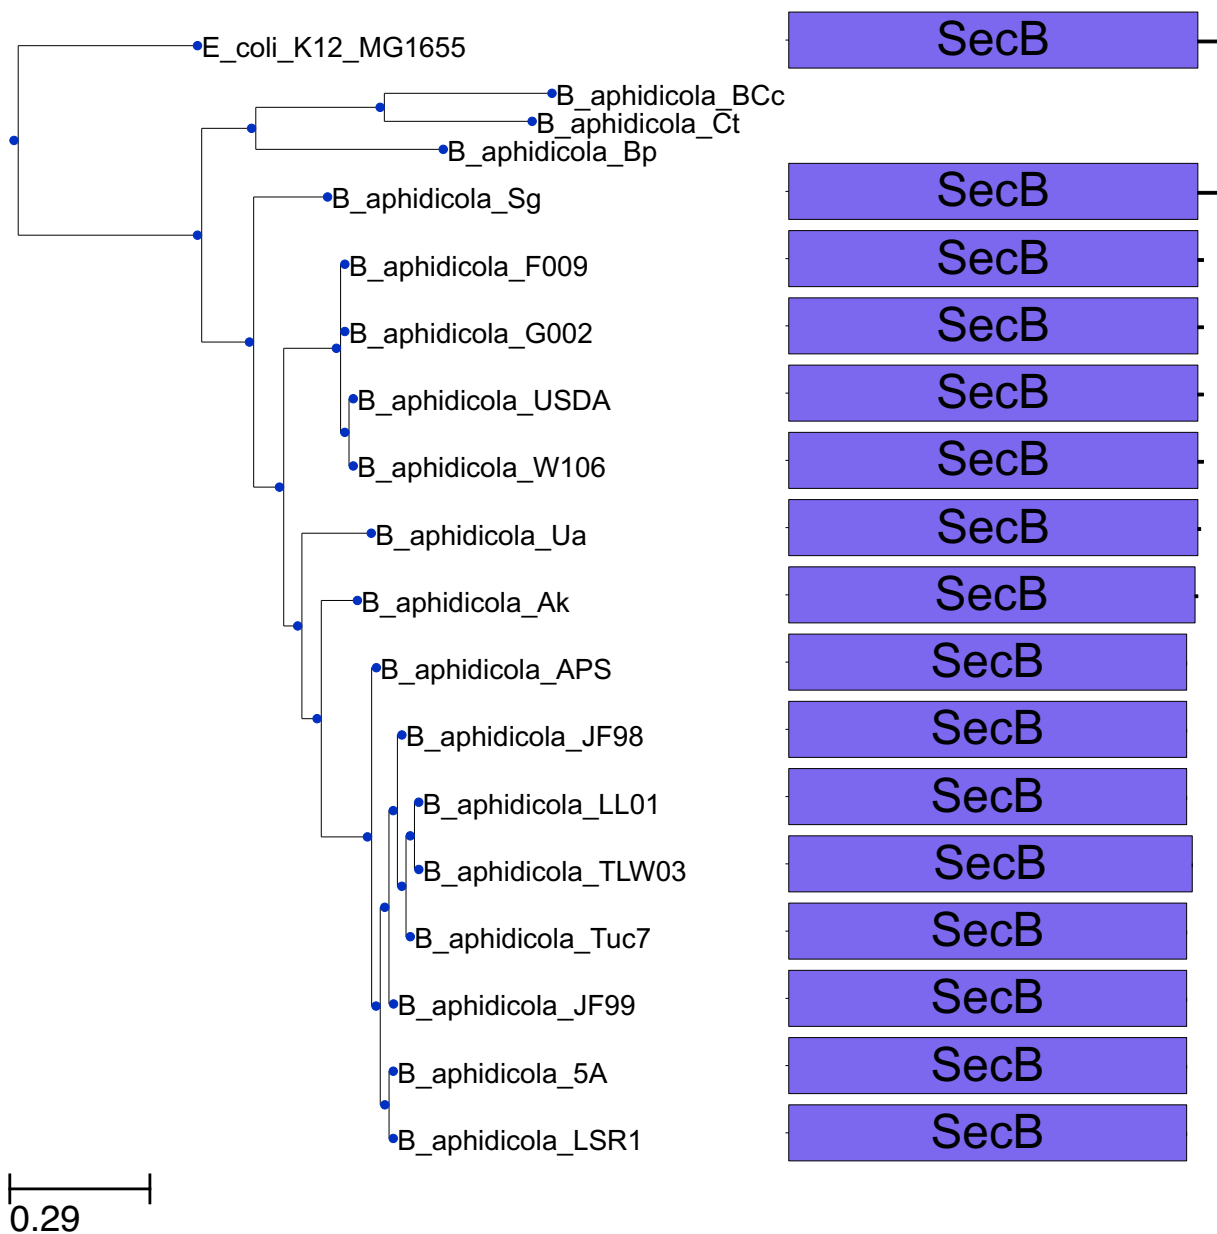

*secB*  
 NP\_418066.1  
 protein export chaperone

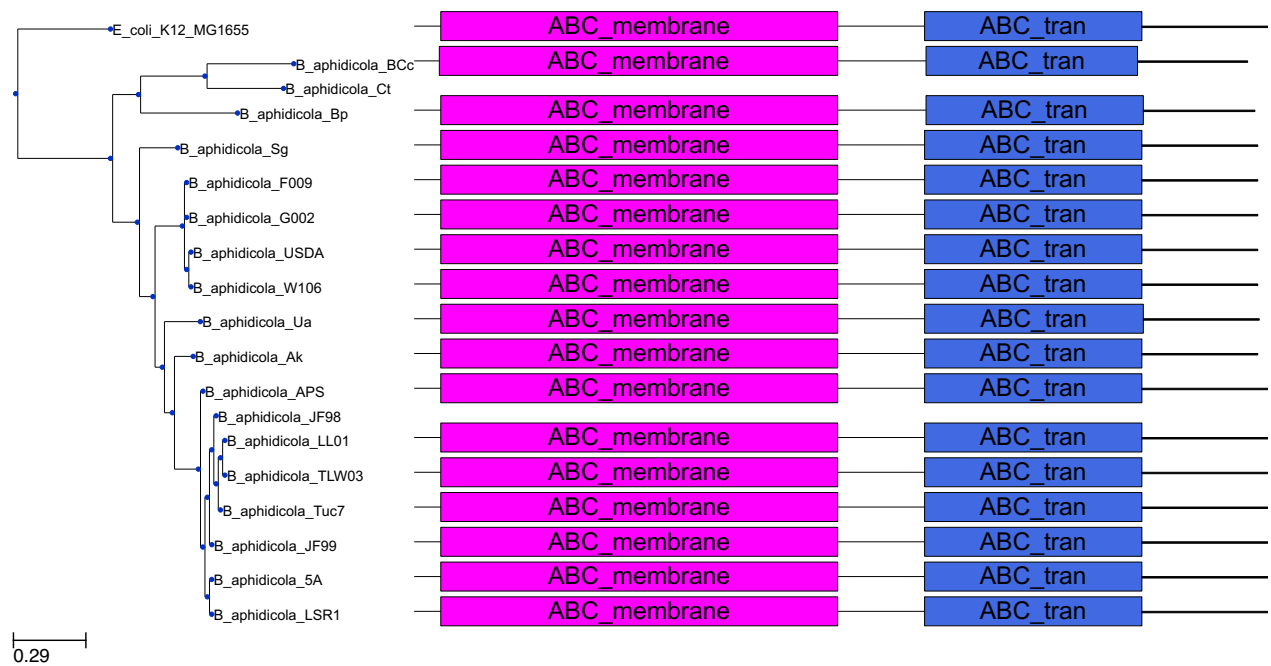

*mdIA*

NP\_414982.1

putative multidrug ABC transporter ATPase

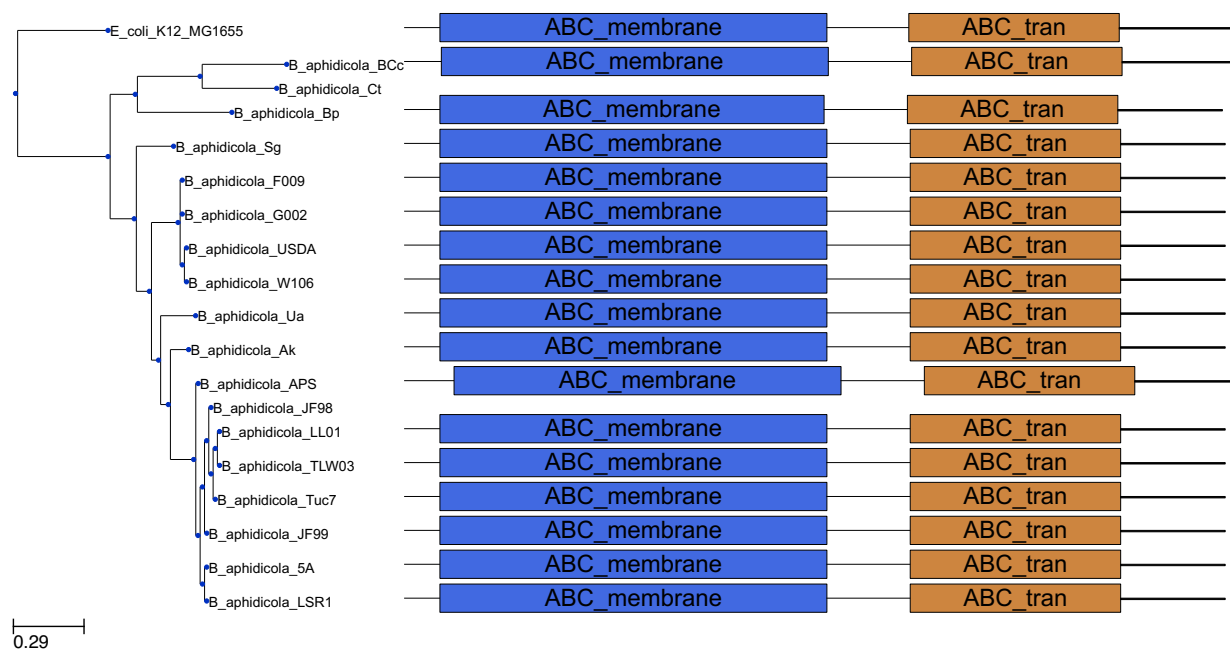

*mdlB*

NP\_414983.1

putative multidrug ABC transporter ATPase

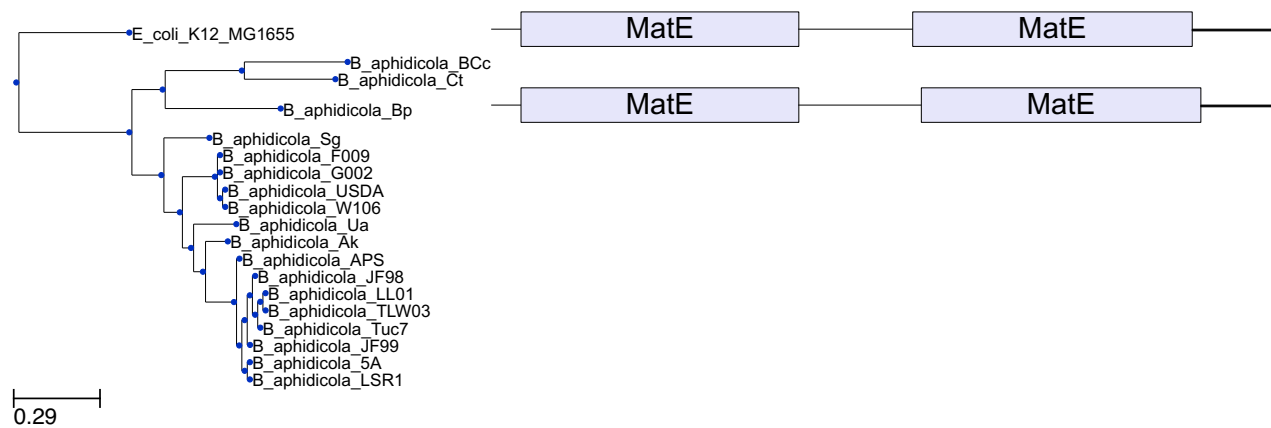

*mdtK*

YP\_025307.1

multidrug efflux system transporter

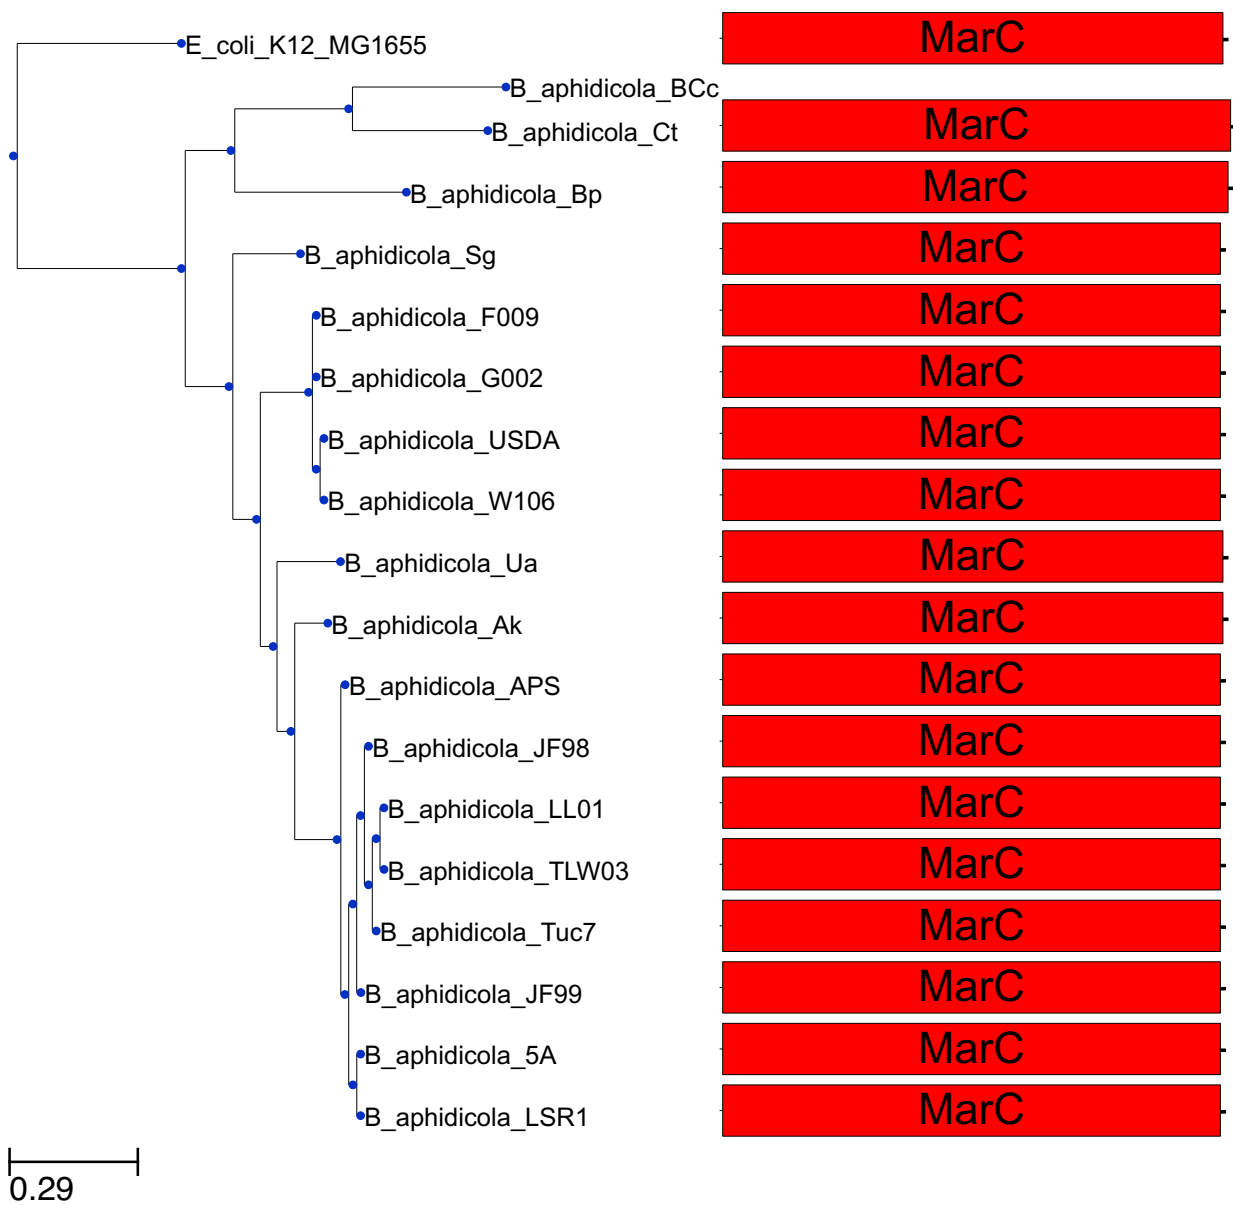

*yhgN*  
NP\_417892.1  
UPF0056 family inner membrane protein
