# Supplementary material for: Testing the Domino Theory of Gene Loss in Buchnera aphidicola: The Relevance of Epistatic Interactions
Source: MDPI journal article supplement (doi:10.3390/life8020017), 2018-05-29
Supplement: s1 [file s1]

a)

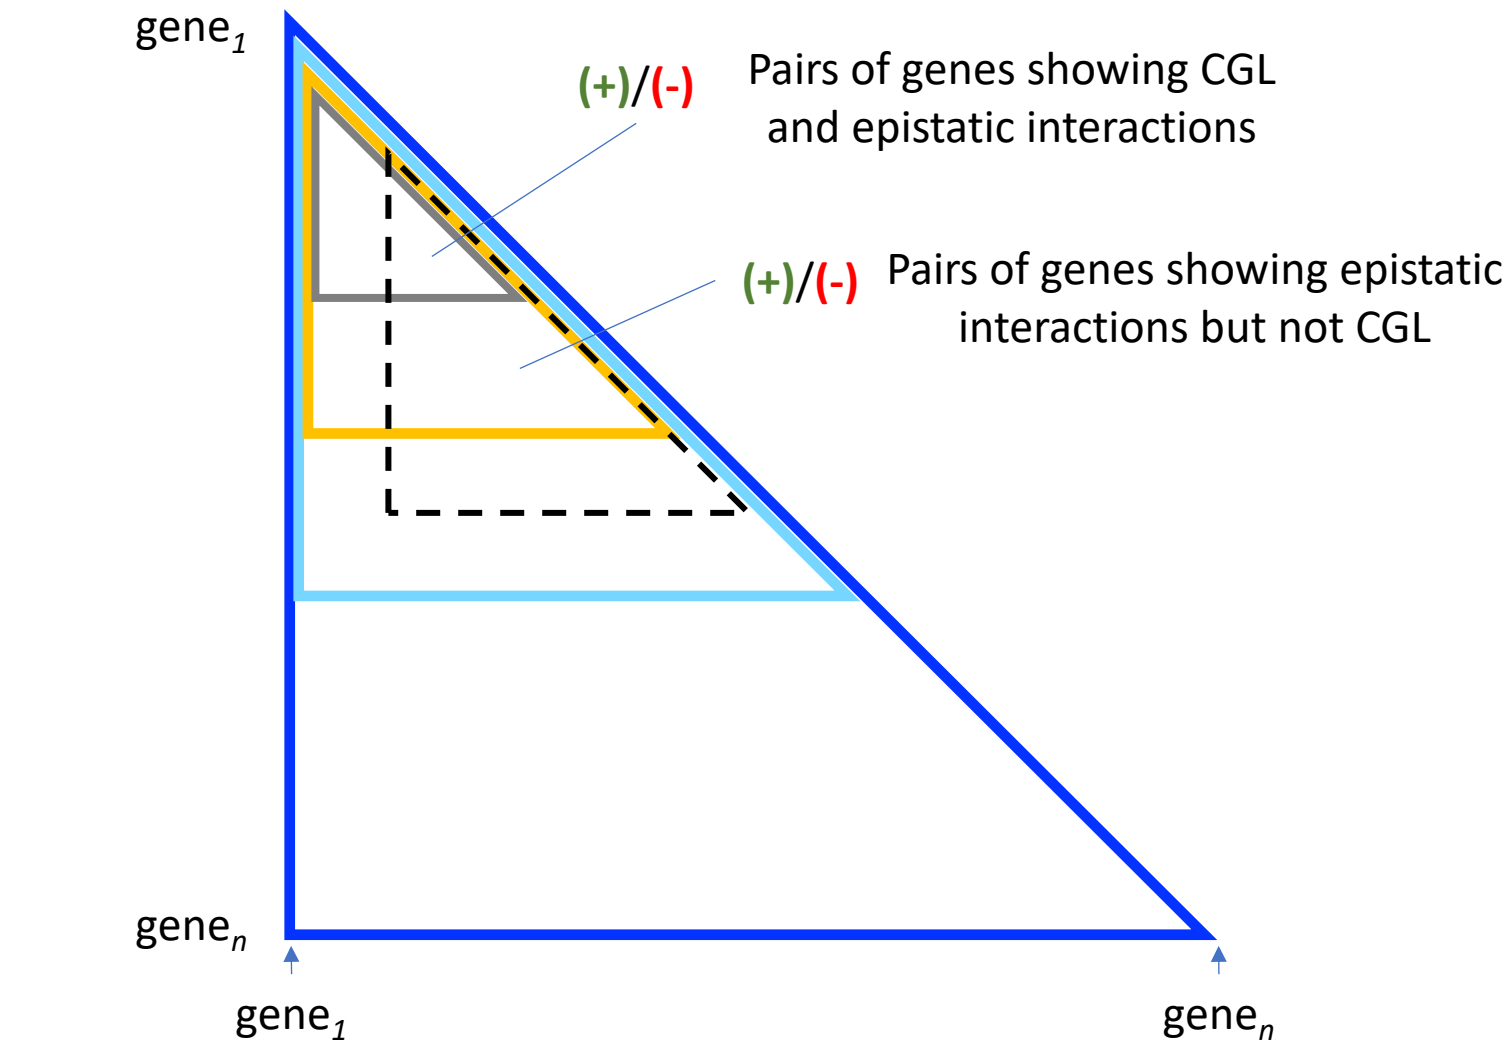

b)

|        | RM                  |                   | MM                 |                     | RM                  |                   | MM                 |                     |
|--------|---------------------|-------------------|--------------------|---------------------|---------------------|-------------------|--------------------|---------------------|
|        | epistasis           |                   | epistasis          |                     | epistasis           |                   | epistasis          |                     |
|        | (+)                 | (-)               | (+)                | (-)                 | (+)                 | (-)               | (+)                | (-)                 |
| CGL    | 4<br>(1:1:2)        | 0<br>(0:0:0)      | 9<br>(0:5:4)       | 4<br>(2:2:0)        | 42<br>(12:21:9)     | 13<br>(1:9:3)     | 46<br>(5:23:18)    | 48<br>(19:23:6)     |
| No CGL | 403<br>(147:198:58) | 180<br>(34:94:52) | 288<br>(66:157:65) | 505<br>(194:253:58) | 365<br>(136:178:51) | 167<br>(33:85:49) | 251<br>(61:139:51) | 461<br>(177:232:52) |

FDR < 0.1

FDR < 0.45

(Essntial-Essential:Essential-Non-essential:Non-essential-Non-essential)

c)

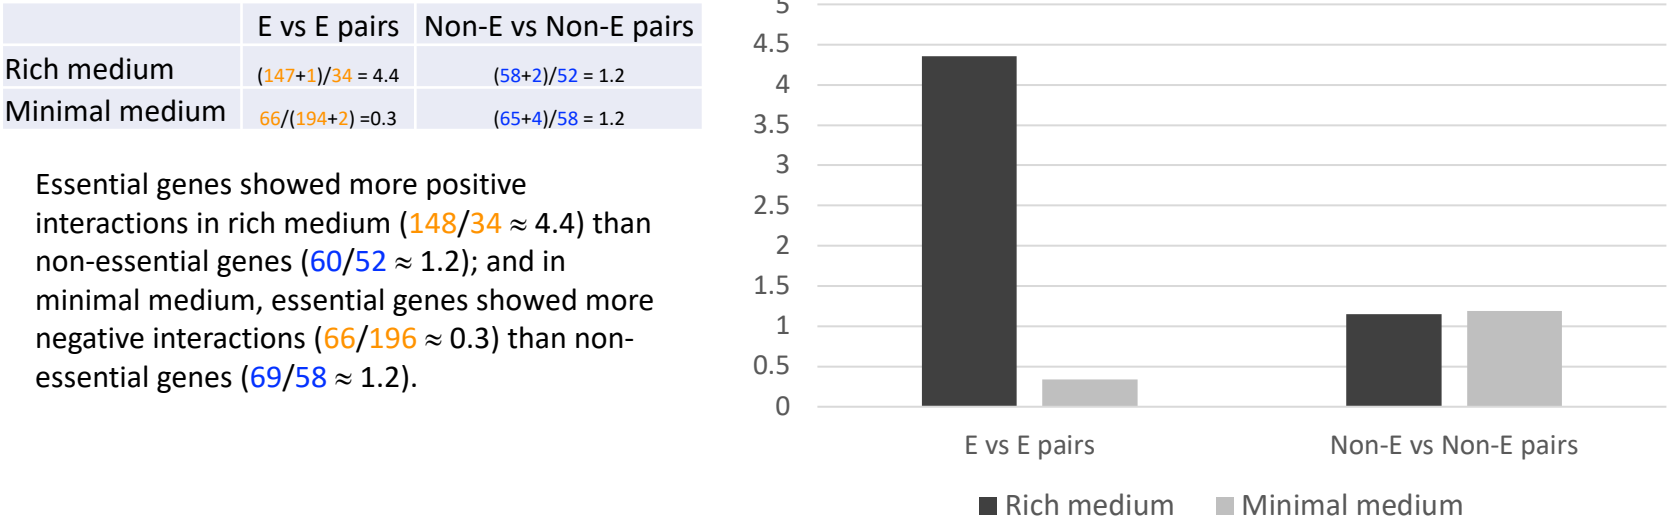

- E. coli*
- Genes studied by Babu et al. (2011)
- E. coli* genes studied here with orthologs in *Buchnera*
- Negative epistasis
- Positive epistasis
